# Supplementary material for: Treatment effects of soluble guanylate cyclase modulation on diabetic kidney disease at single-cell resolution
Source: PubMed Central journal article supplement (PMC10140477; doi:10.1016/j.xcrm.2023.100992), 2023-04-05
Supplement: mmc1.pdf [file mmc1.pdf]

**Cell Reports Medicine, Volume 4**

**Supplemental information**

**Treatment effects of soluble guanylate cyclase  
modulation on diabetic kidney disease  
at single-cell resolution**

**Michael S. Balzer, Mira Pavkovic, Julia Frederick, Amin Abedini, Alexius Freyberger, Julia Vienenkötter, Ilka Mathar, Krystyna Siudak, Frank Eitner, Peter Sandner, Manuel Grundmann, and Katalin Susztak**

## Supplementary Information

### Treatment effects of soluble guanylate cyclase modulation on diabetic kidney disease at single-cell resolution

Michael S. Balzer<sup>1,2,3,4</sup>, Mira Pavkovic<sup>5</sup>, Julia Frederick<sup>1,2</sup>, Amin Abedini<sup>1,2</sup>, Alexius Freyberger<sup>5</sup>, Julia Vienenkötter<sup>5</sup>, Ilka Mathar<sup>5</sup>, Krystyna Siudak<sup>5</sup>, Frank Eitner<sup>5,6</sup>, Peter Sandner<sup>5,7</sup>, Manuel Grundmann<sup>5</sup>, and Katalin Susztak<sup>1,2,8,9</sup>

<sup>1</sup>Renal, Electrolyte, and Hypertension Division, Department of Medicine, Perelman School of Medicine, University of Pennsylvania, Philadelphia, PA 19104, USA

<sup>2</sup>Institute for Diabetes, Obesity and Metabolism, Perelman School of Medicine, University of Pennsylvania, Philadelphia, PA 19104, USA

<sup>3</sup>Department of Nephrology and Medical Intensive Care, Charité – Universitätsmedizin Berlin, 10117 Berlin, Germany

<sup>4</sup>Berlin Institute of Health at Charité – Universitätsmedizin Berlin, BIH Biomedical Innovation Academy, BIH Charité Clinician Scientist Program, 10117 Berlin, Germany

<sup>5</sup>Bayer AG, Research and Early Development, Pharma Research Center, 42096 Wuppertal, Germany

<sup>6</sup>Division of Nephrology and Clinical Immunology, RWTH Aachen University, 52062 Aachen, Germany

<sup>7</sup>Department of Pharmacology, Hannover Medical School, 30625 Hannover, Germany

<sup>8</sup>Department of Genetics, Perelman School of Medicine, University of Pennsylvania, Philadelphia, PA 19104, USA

#### <sup>9</sup>Lead contact

**Katalin Susztak, MD, PhD**

Professor of Medicine

University of Pennsylvania

Perelman School of Medicine

3400 Civic Center Blvd

Smilow Translational Research Center 12-123

Philadelphia, PA 19104

Phone: (215) 898-2009

[ksusztak@pennmedicine.upenn.edu](mailto:ksusztak@pennmedicine.upenn.edu)

#### Supplementary Table

Page 2

#### Supplementary Figures

Pages 3-30

**Table S1. Blood pressure effects of sGC activation in the ZSF1 rat. Related to Figure 1.**

| <b>Treatment</b>      | <b>Baseline MAP (mmHg)</b> | <b>Post-application MAP (mmHg)</b> |
|-----------------------|----------------------------|------------------------------------|
| Vehicle               | 120.4 ± 4.8                | 112.6 ± 1.9                        |
| Runcaciguat (3 mg/kg) | 122.4 ± 4.0                | 110.7 ± 1.8                        |

Mean arterial blood pressure (MAP) measured in mmHg with telemetric implants in ZSF1 rats treated with either vehicle (n=6) or 3 mg/kg runcaciguat (n=5); data are shown as mean ± SEM registered over 1 hour before the application for baseline (hour -1 to 0) and 5 hours after application (hour +1 to +6).

**a**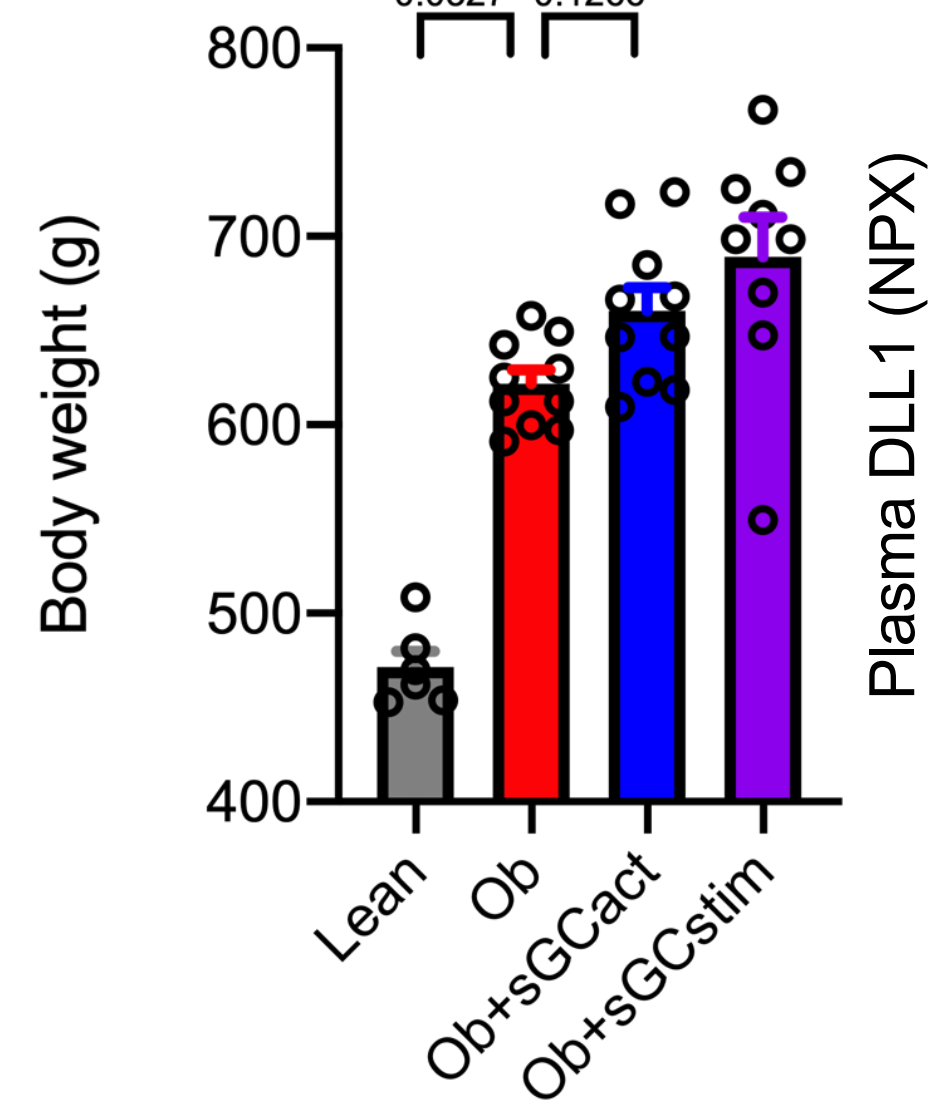**c**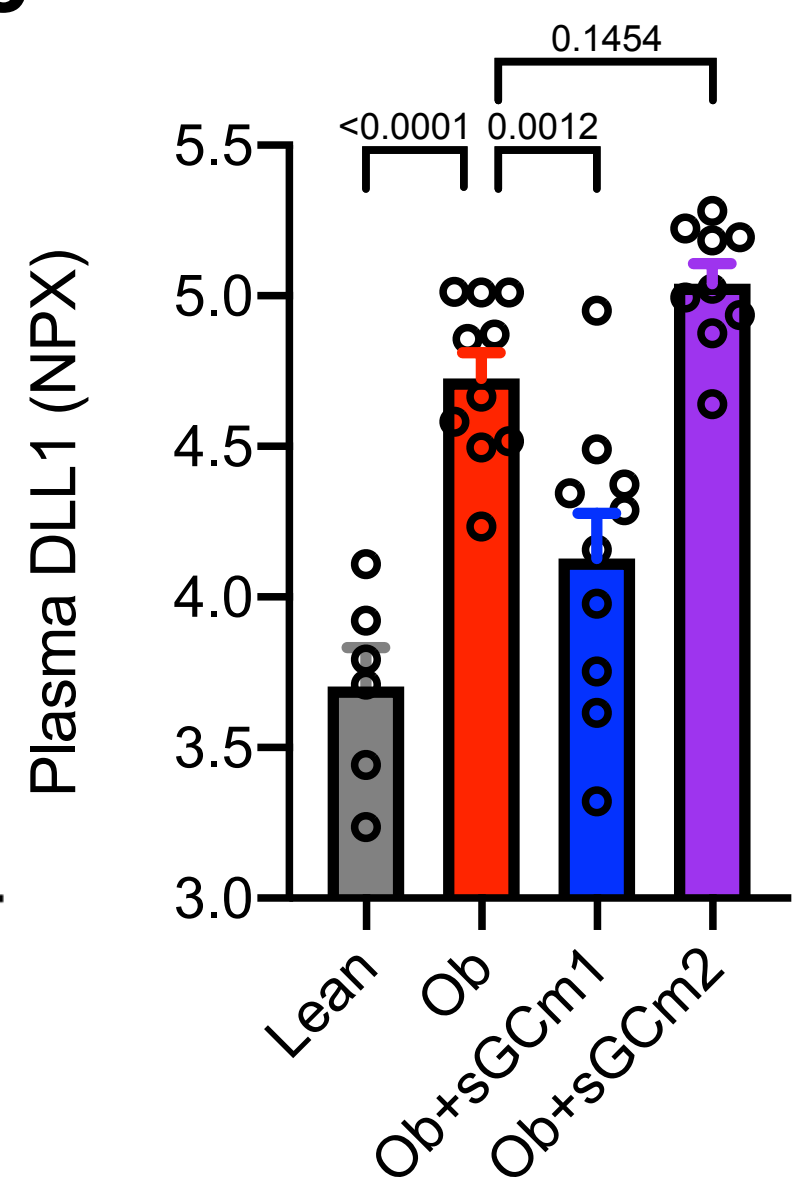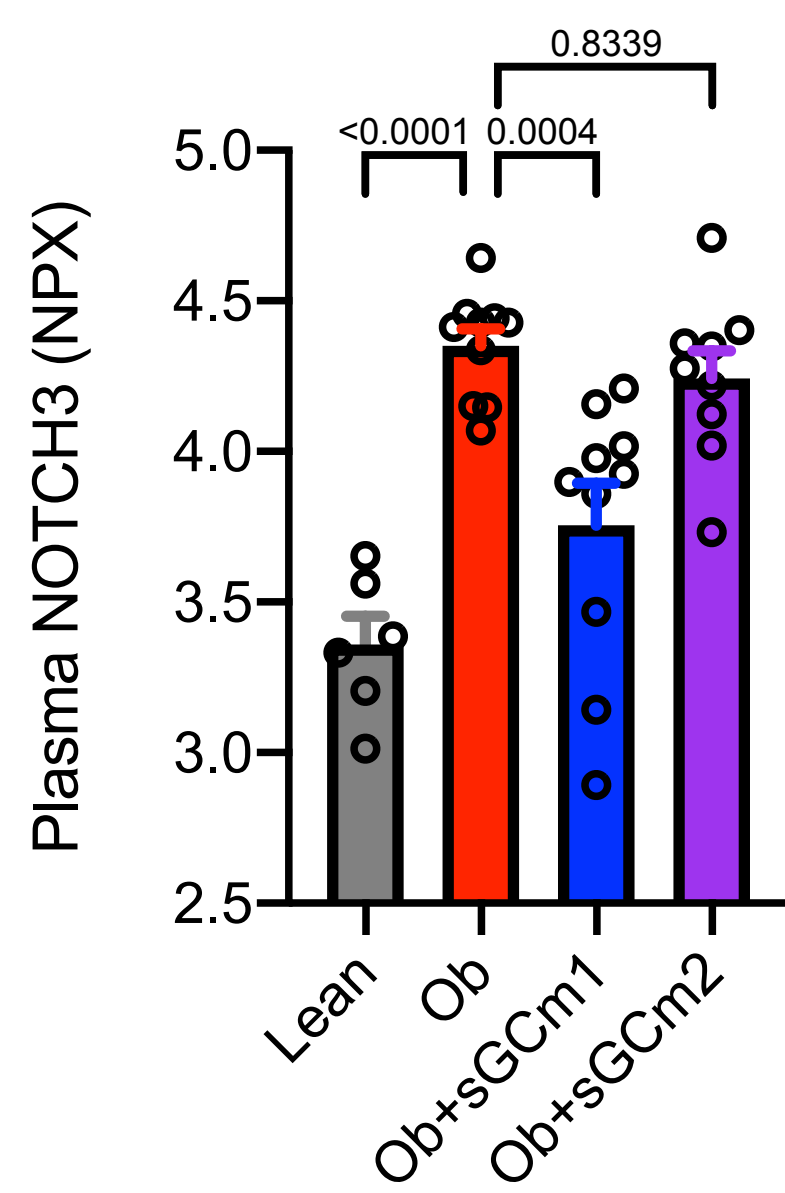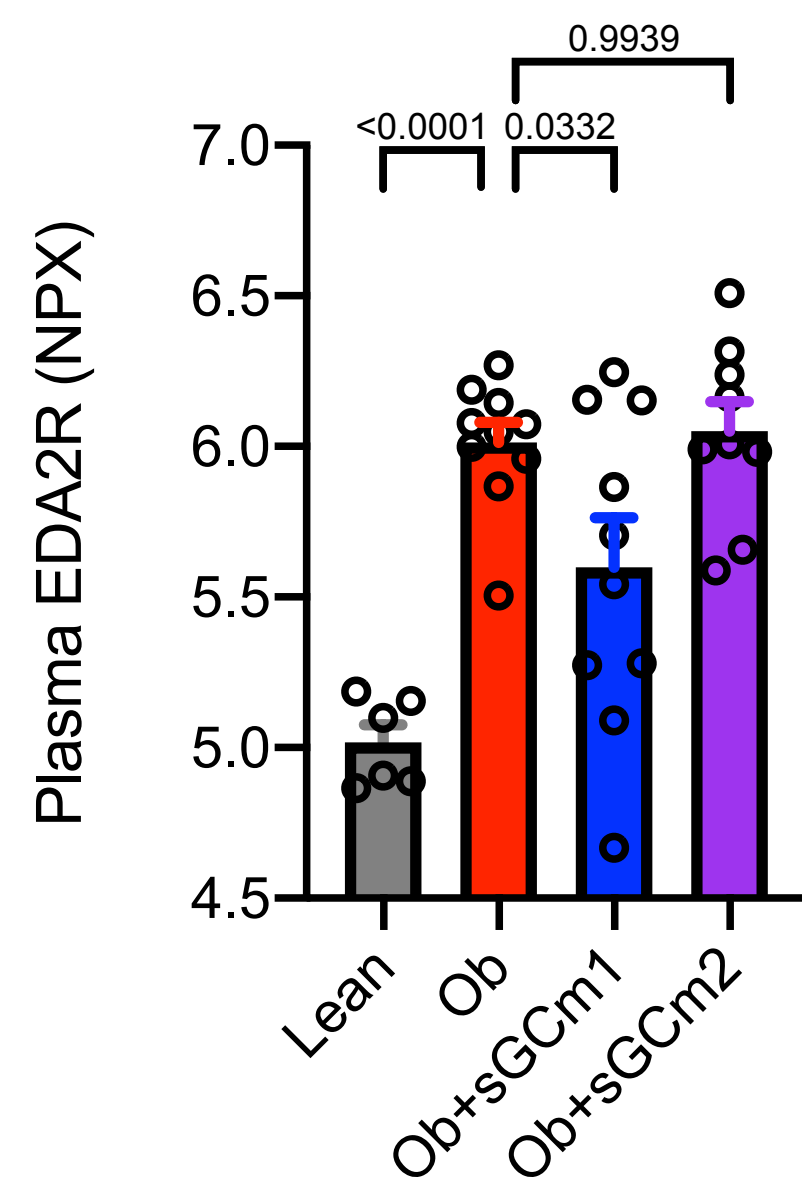**b**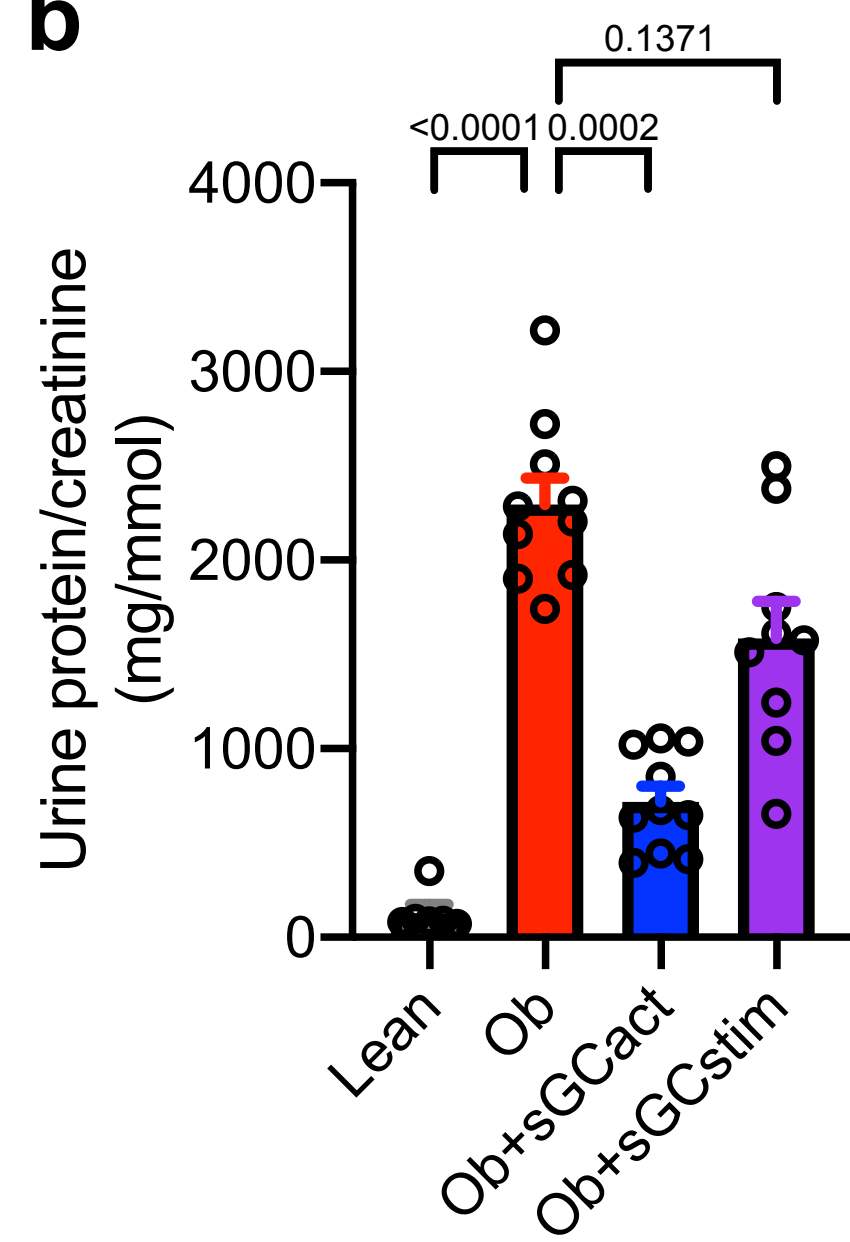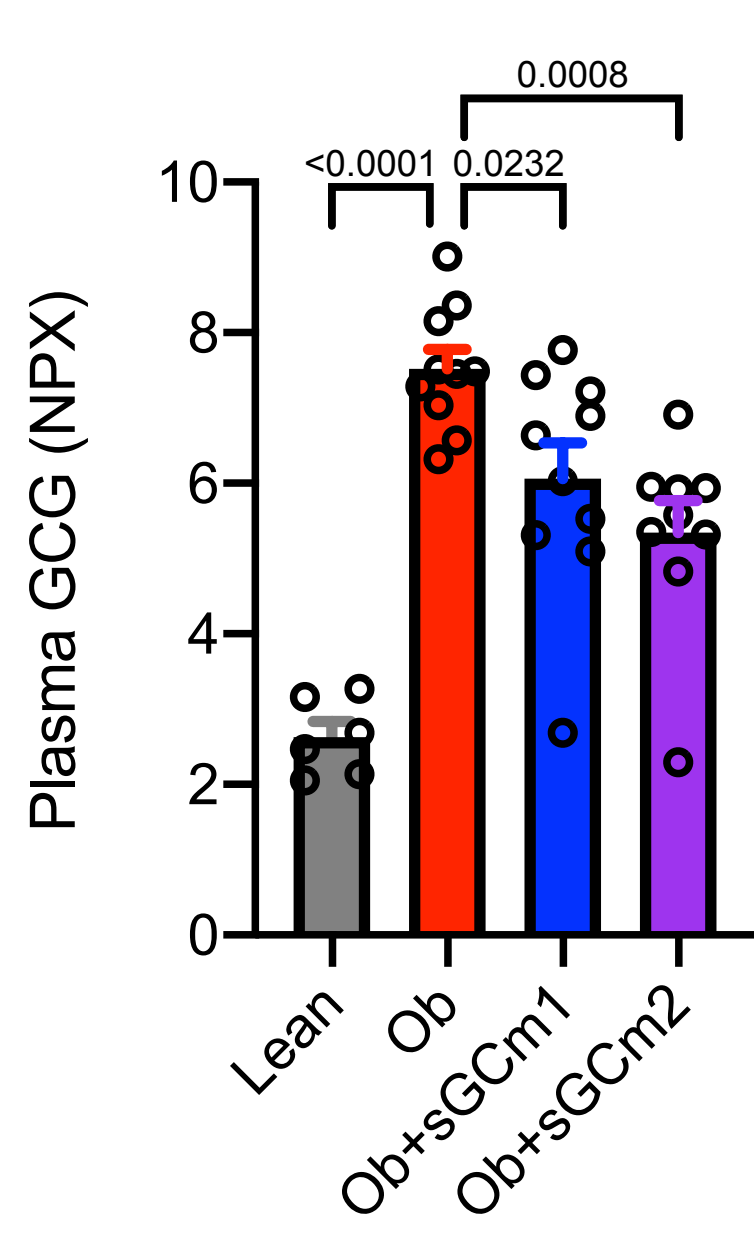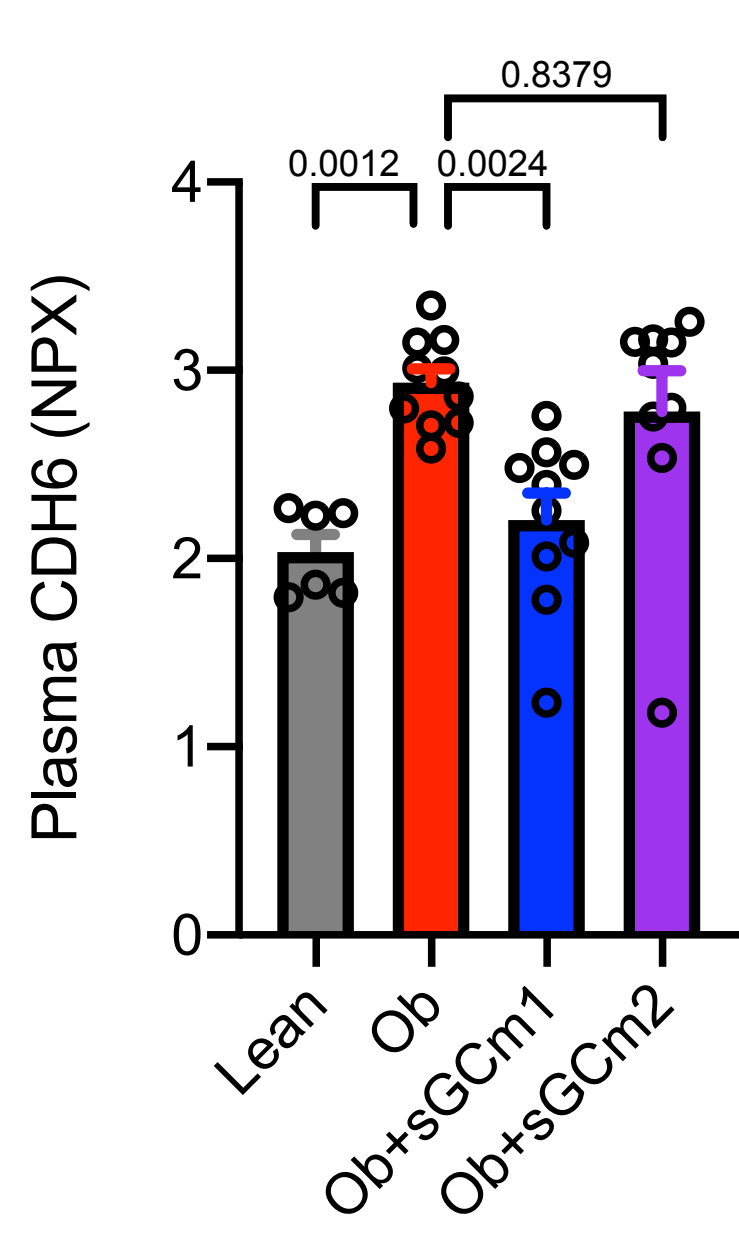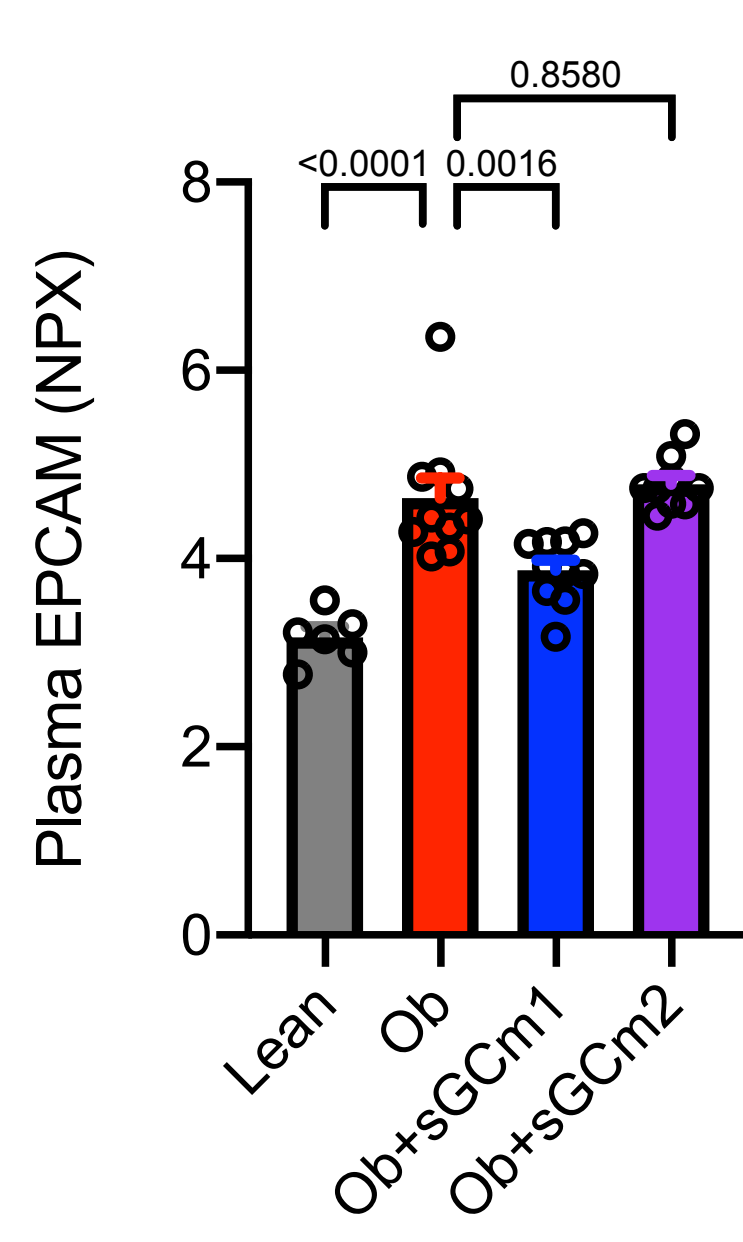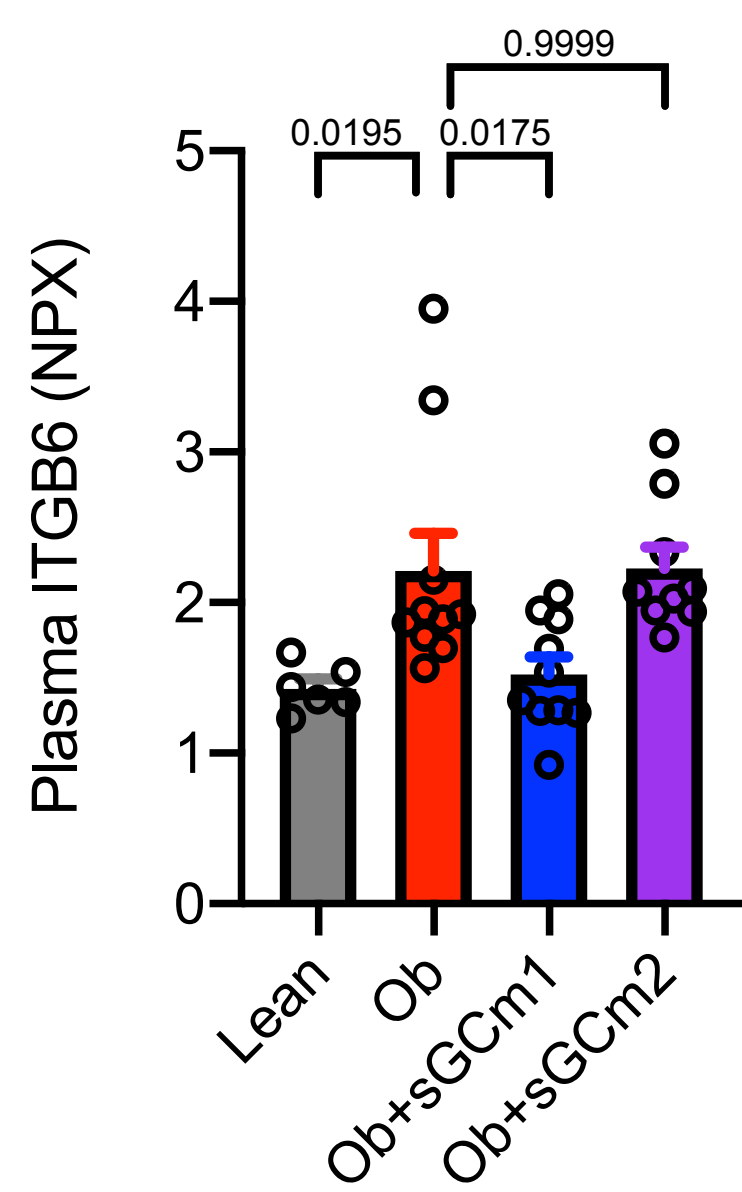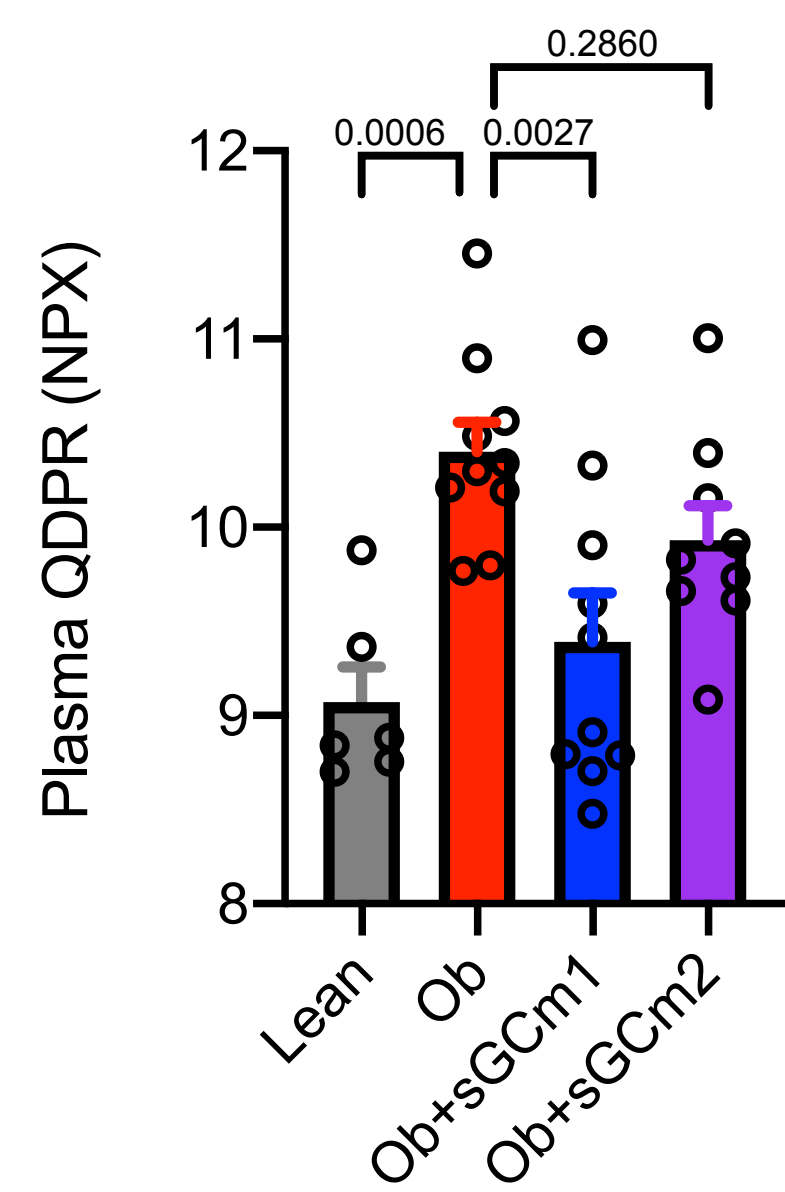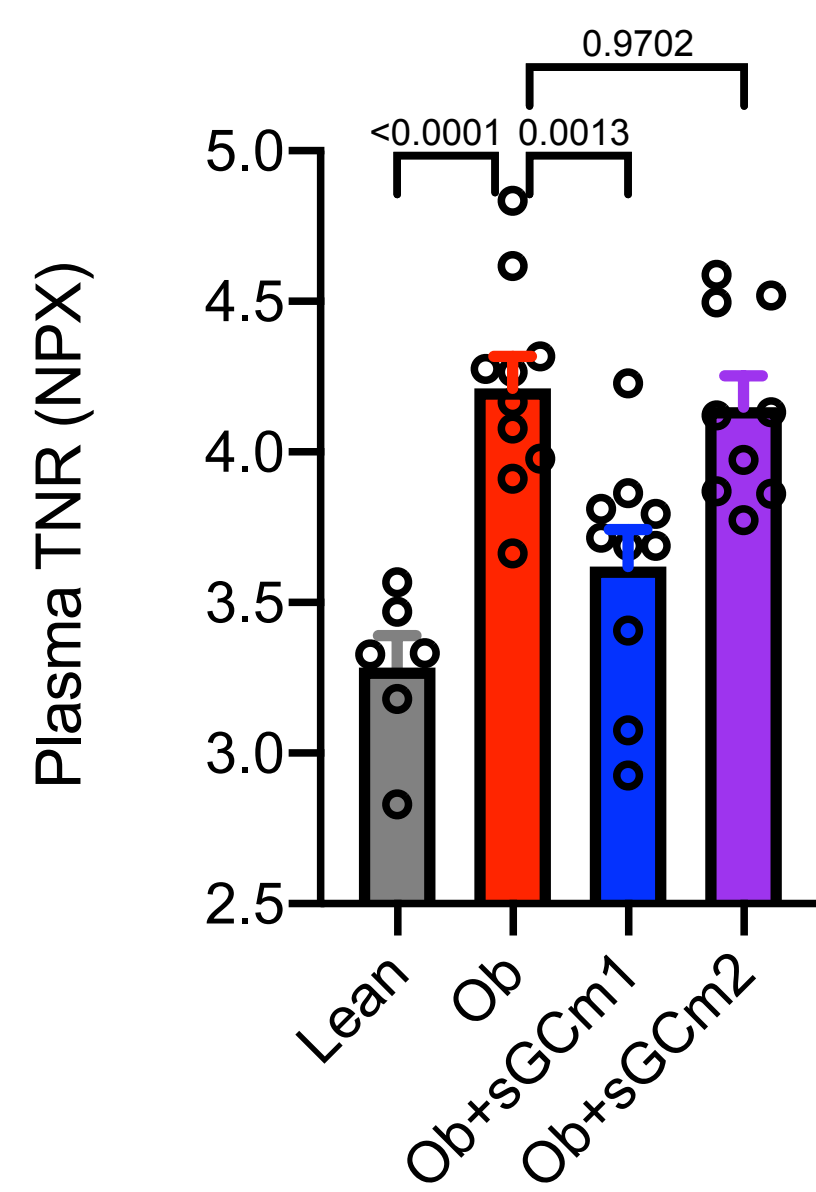

**Figure S1. Diabetic ZSF1 rats recapitulate phenotypic changes of DKD with marked disease improvement by sGC activators. Related to Figure 1.**

- (a) Body weight; p values are given for Kruskal-Wallis test (Benjamini, Krieger, Yekutieli-corrected); Ob, Obese.
- (b) Urinary protein/creatinine ratio; p values are given for Kruskal-Wallis test (Benjamini, Krieger, Yekutieli-corrected); Ob, Obese.
- (c) Explorative proteomics analysis of 92 plasma proteins using a multiplexed proximity extension assay (Olink); p values are given for one-way ANOVA (Benjamini, Krieger, Yekutieli-corrected); NPX, normalized protein expression; Ob, Obese.

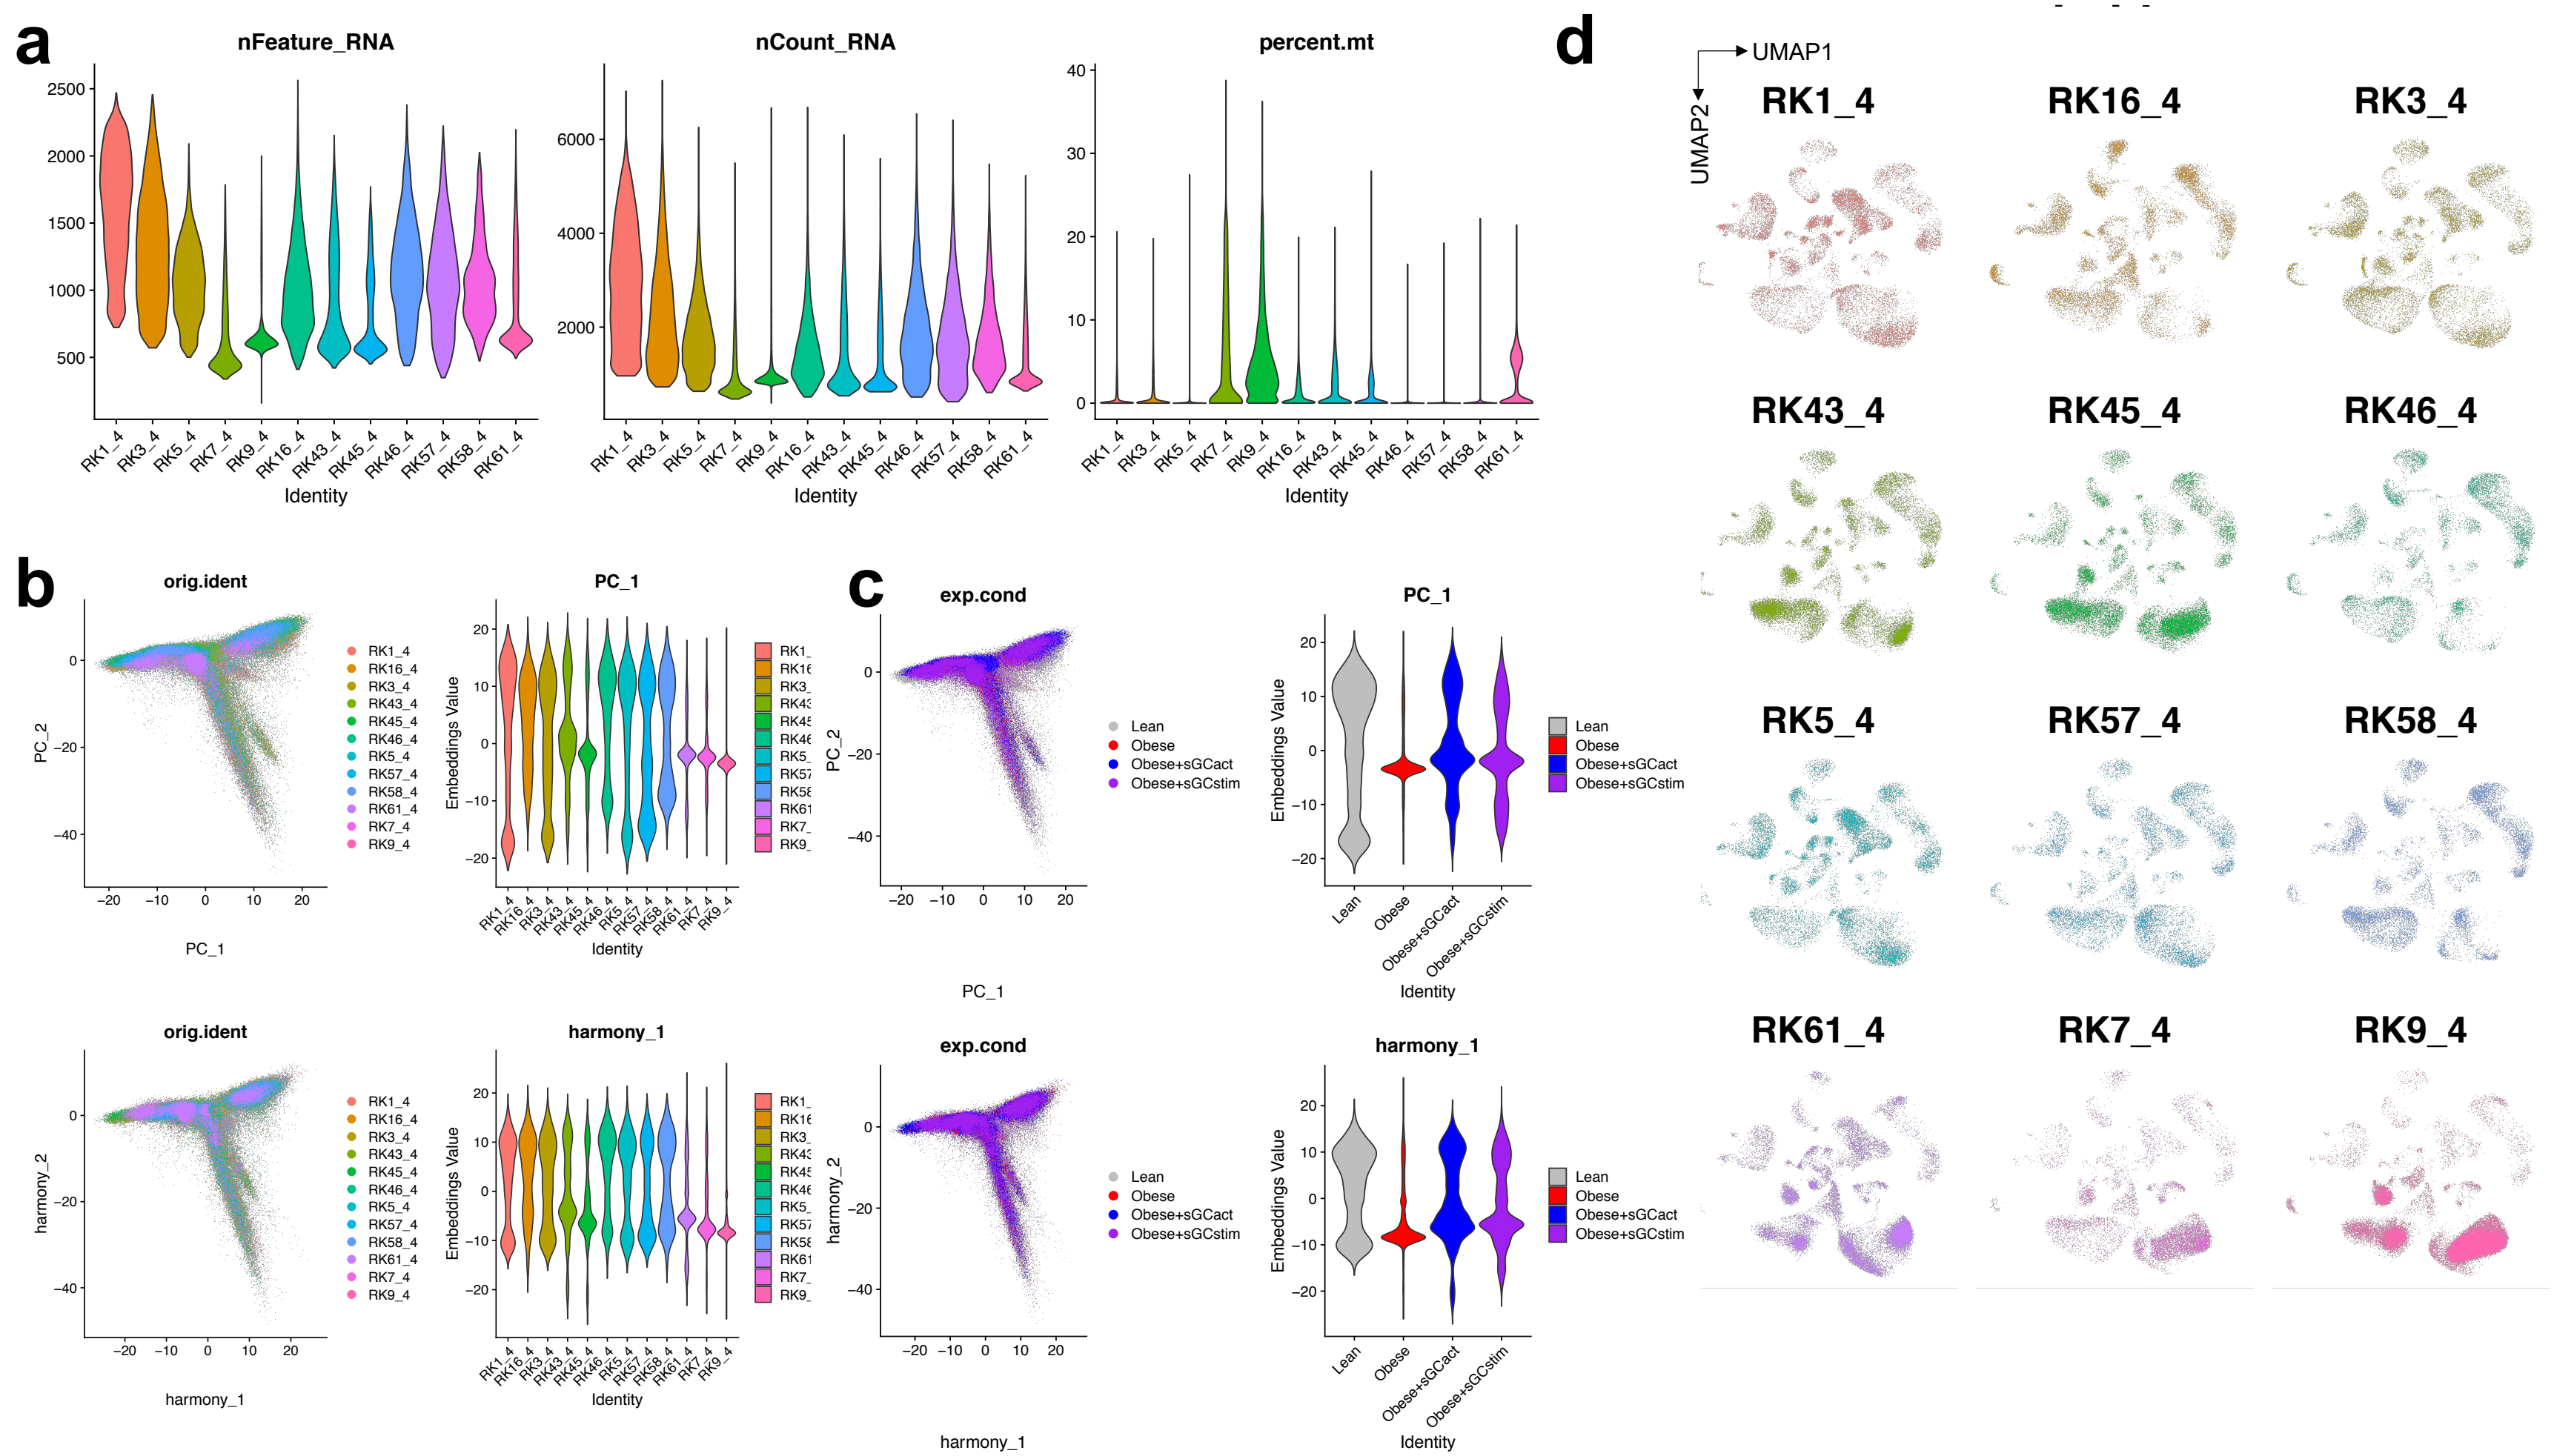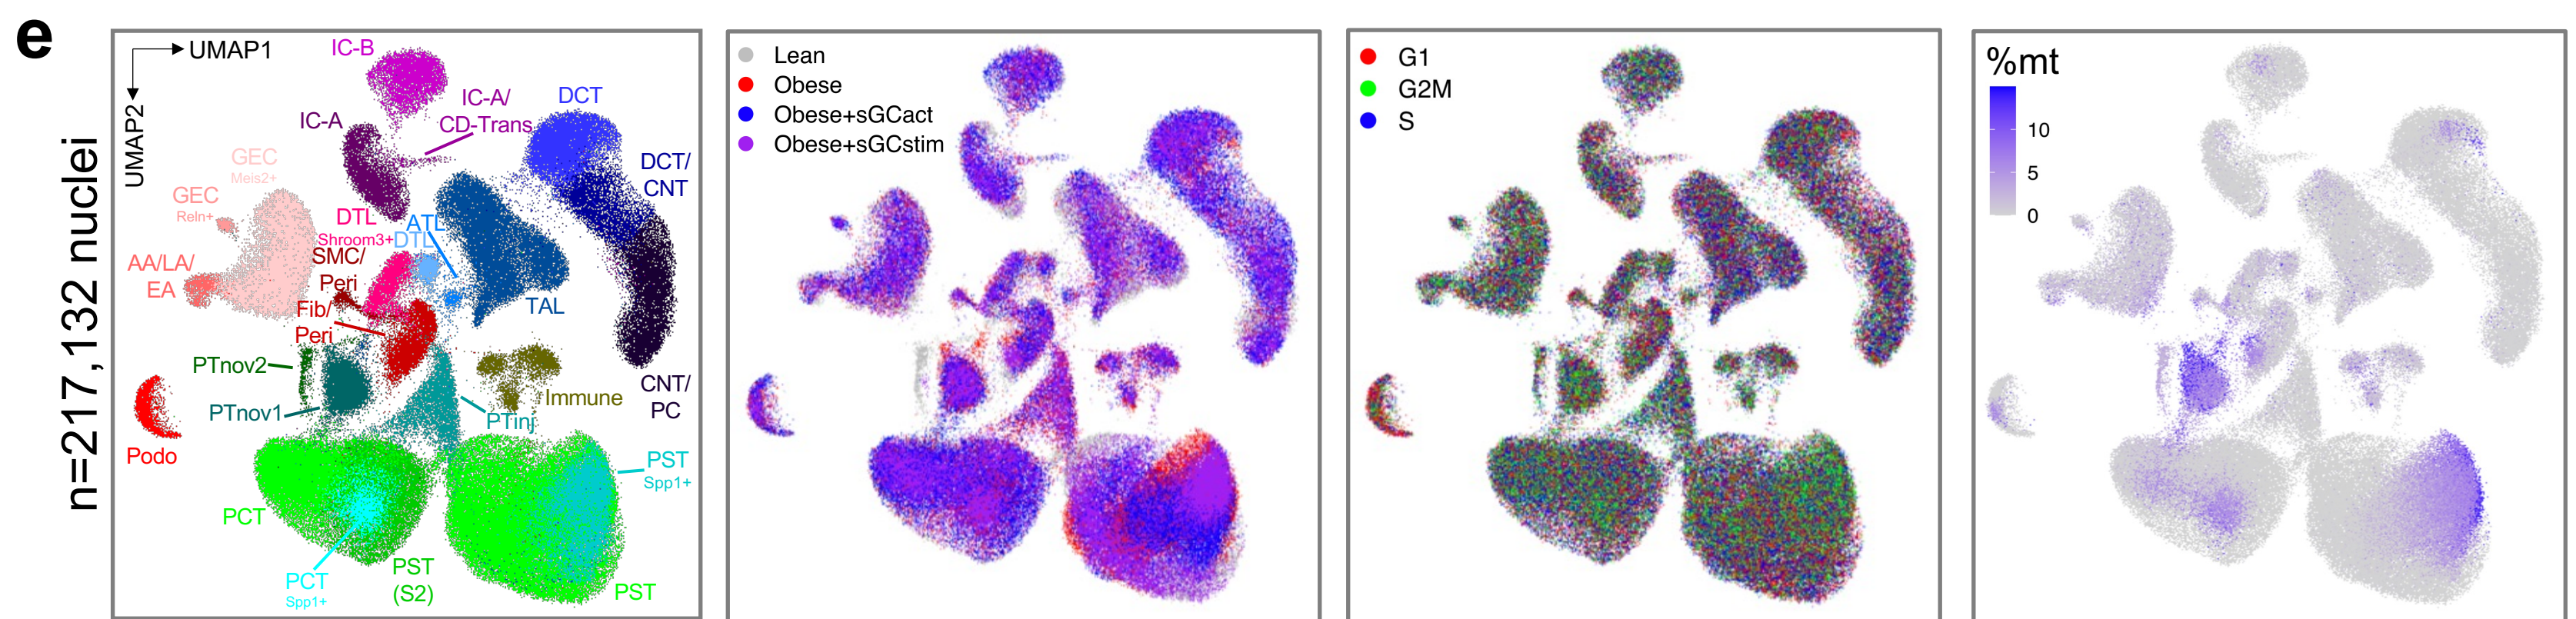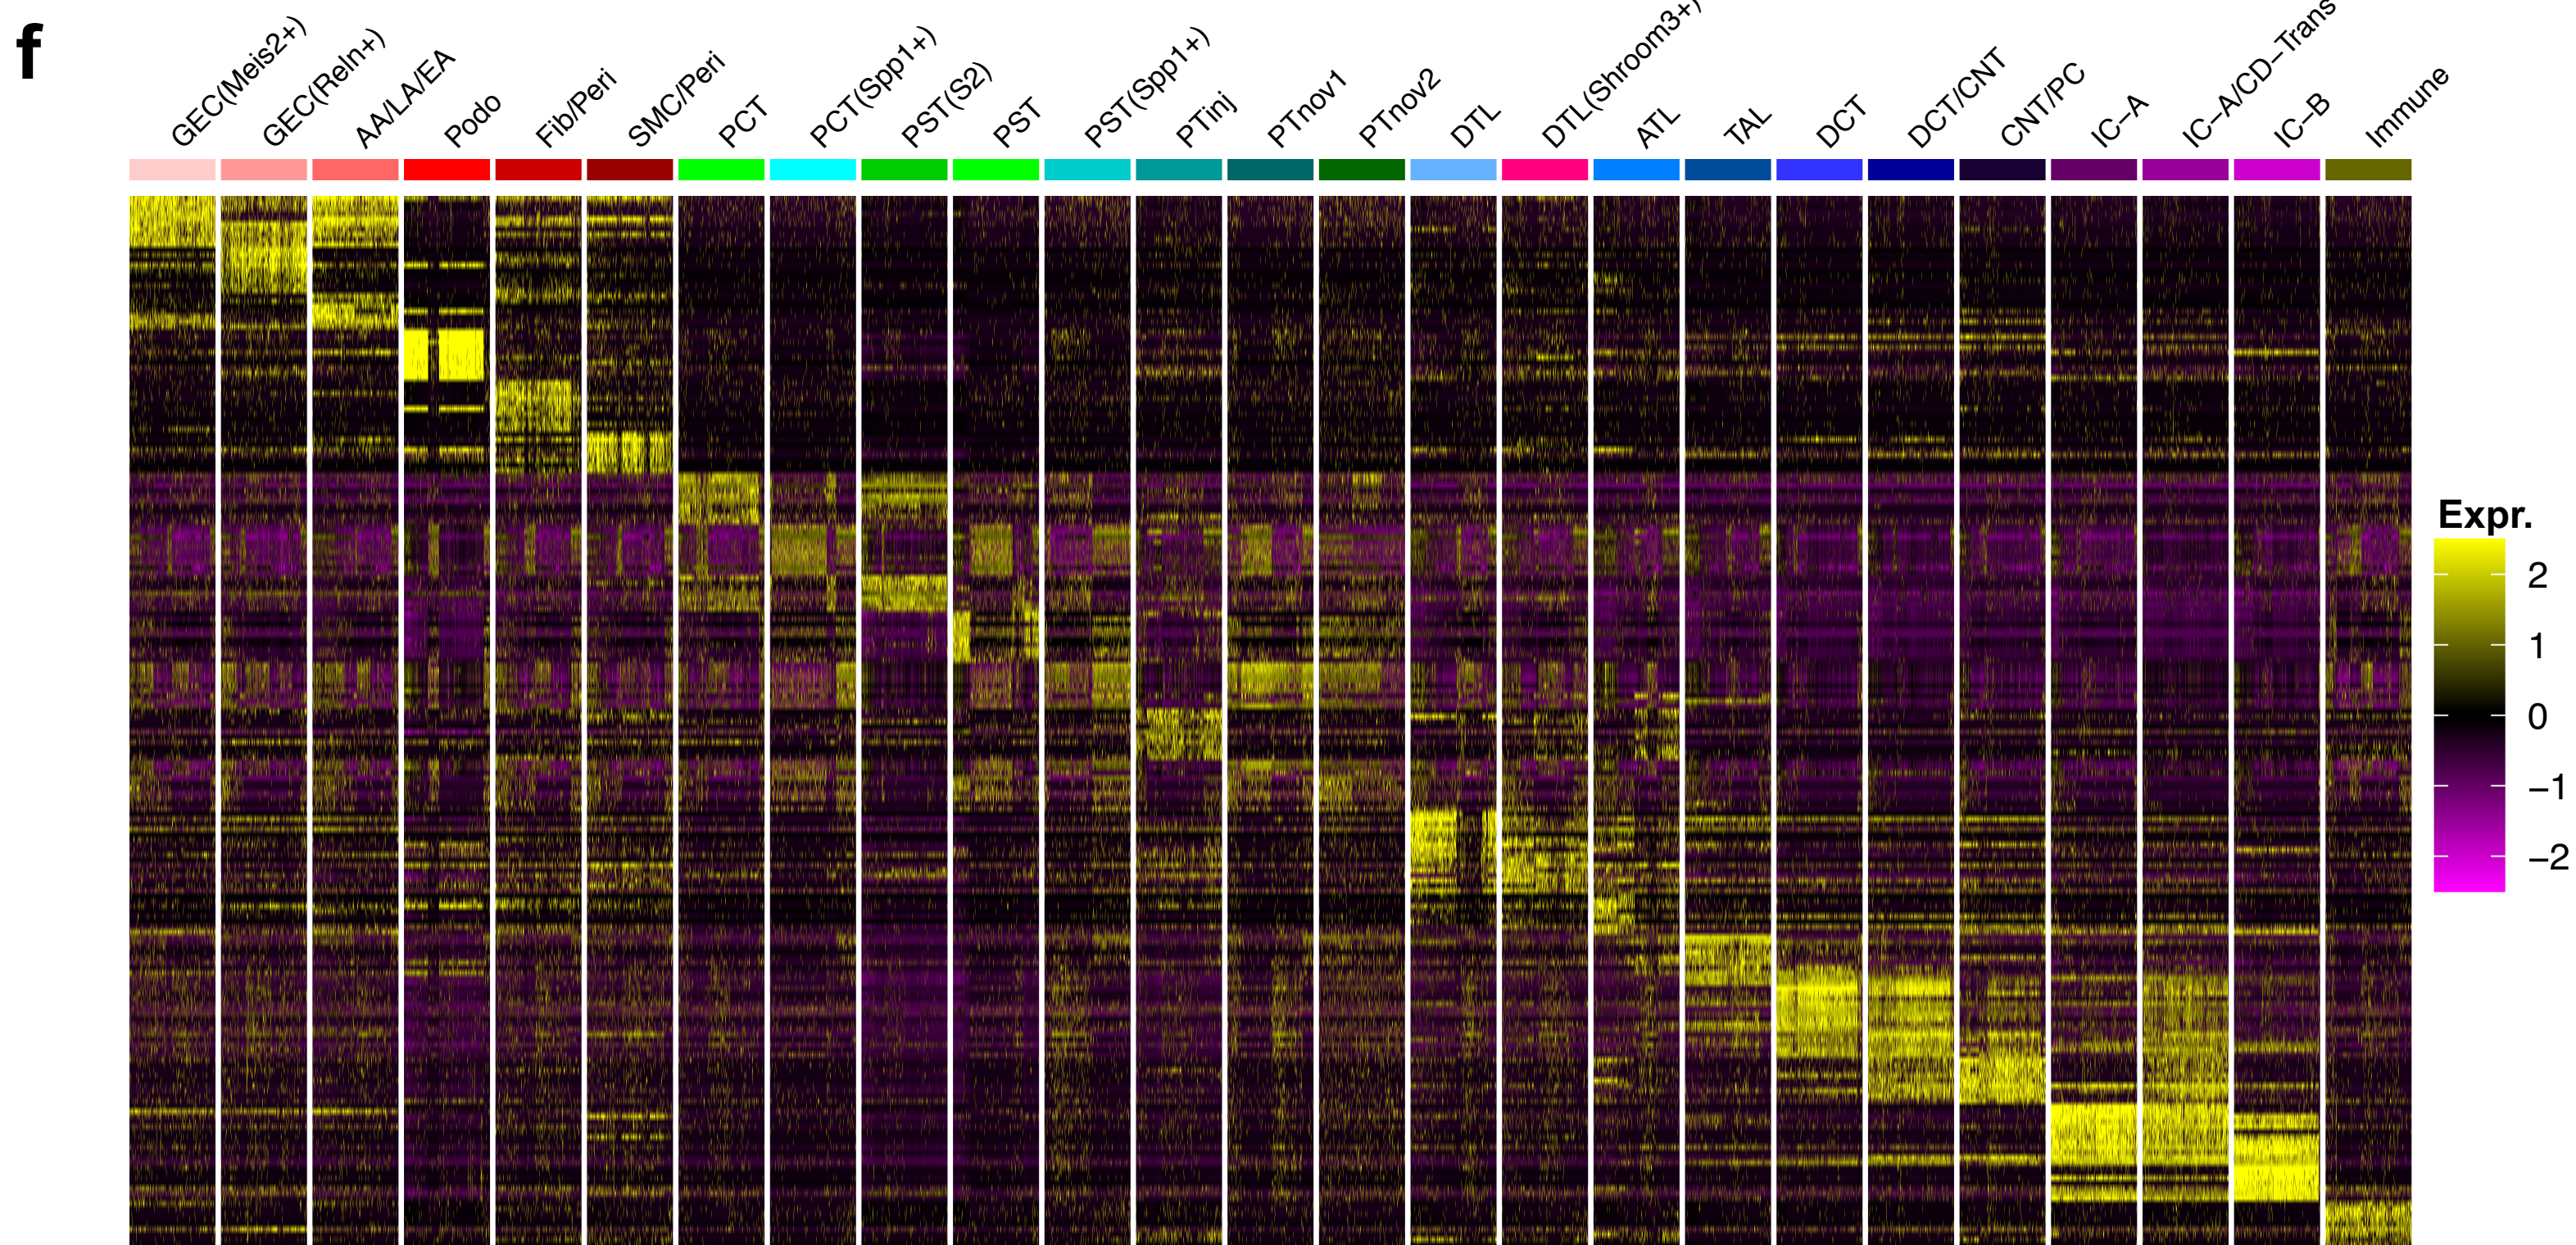

**Figure S2. Single-cell transcriptomic landscape of the diabetic ZSF1 rat. Related to Figure 2.**

- (a) Violin plots showing number of informative genes (nFeature\_RNA), unique molecular identifiers (nCount\_RNA), and percentage of mitochondrial genes (percent.mt) per single cell.
- (b) Principal component (PC) representation (left) and violin plots of corresponding embeddings values (right) before (top) and after batch correction (bottom) using Harmony, stratified by individual sample.
- (c) Same as in (b), stratified by experimental group.
- (d) Integrated UMAP corresponding to **Fig. 2a**, stratified by sample.
- (e) Integrated UMAP corresponding to **Fig. 2a**, annotated by low-level clustering, experimental group, cell cycle phase, and mitochondrial percentage (%mt), respectively; GEC, glomerular endothelial cell; AA/LA/EA, afferent arteriole/large artery/efferent arteriole; Podo, podocyte; Fib, fibroblast; Peri, pericyte; SMC, smooth muscle cell; PCT, proximal convoluted tubule; PST(S2); proximal straight tubule (segment 2); PTinj, injured proximal tubule; PTnov, novel PT; DTL, descending thin limb; ATL, ascending thin limb; TAL, thick ascending limb; DCT, distal convoluted tubule; CNT, connecting tubule; PC, collecting duct principal cell; IC-A, collecting duct intercalated cell type A; CD-Trans, collecting duct transitional cell; IC-B, collecting duct intercalated cell type B; Immune, immune cell.
- (f) Heatmap of top 10 differentially expressed genes for low-level clustering, corresponding to **Fig. 2b**.

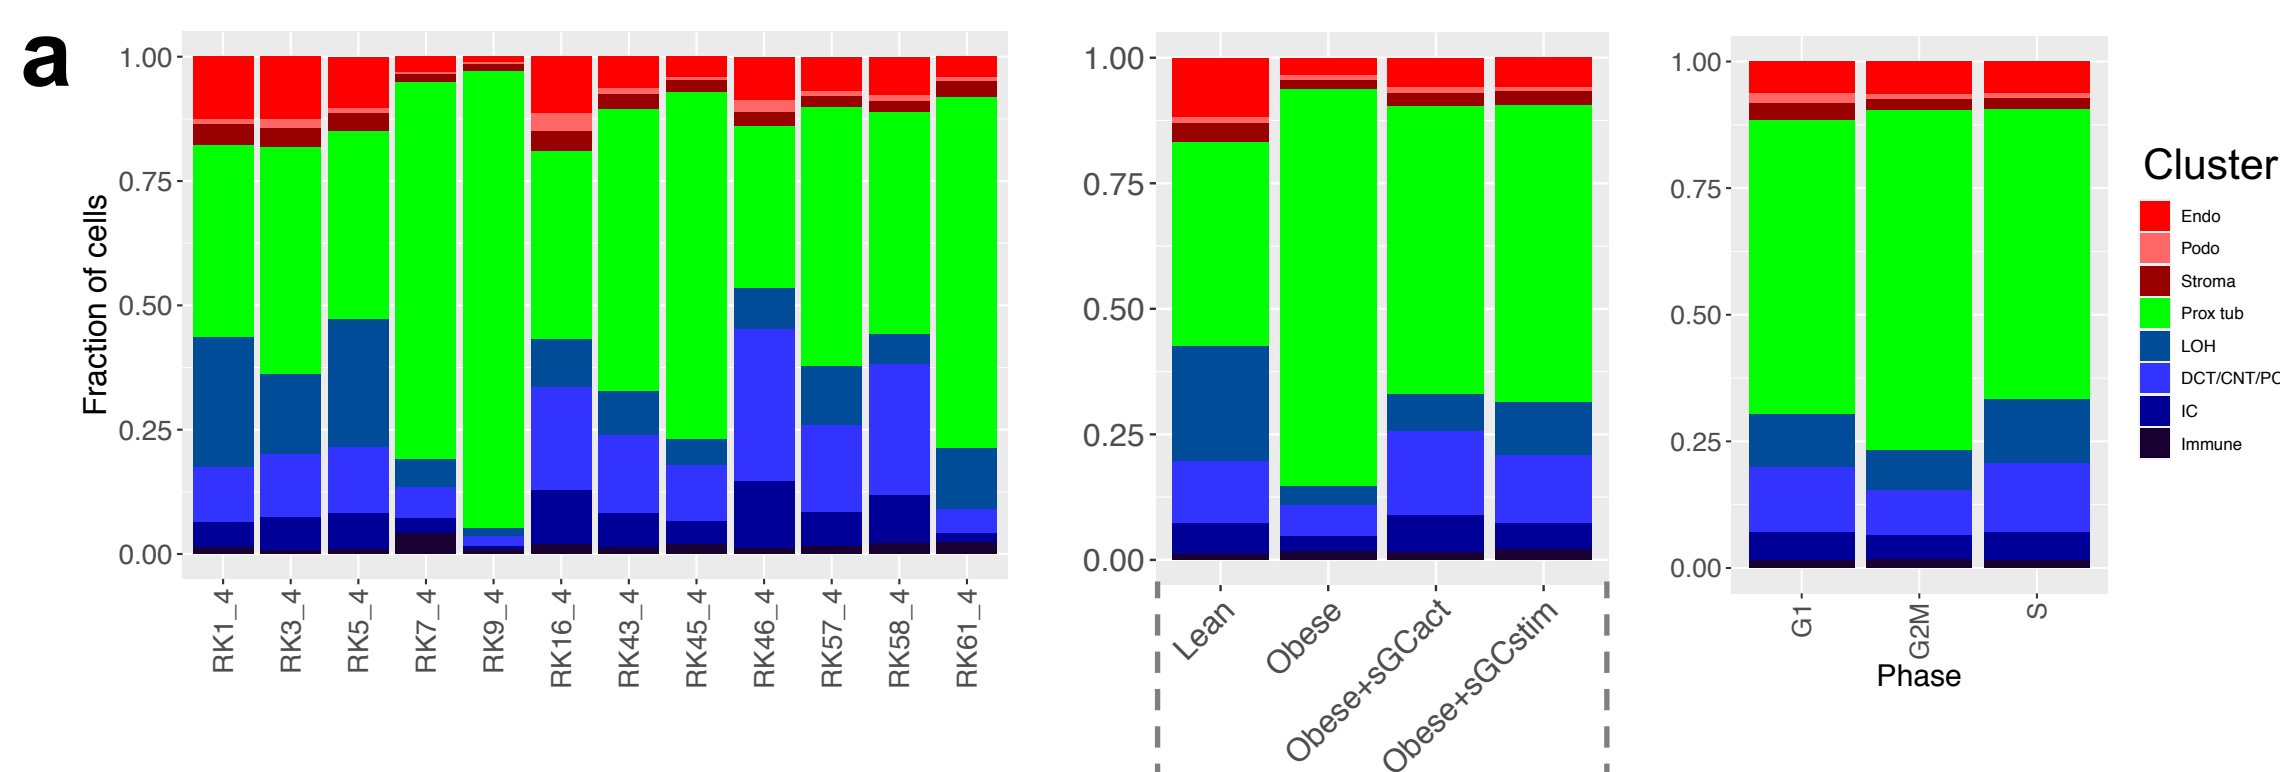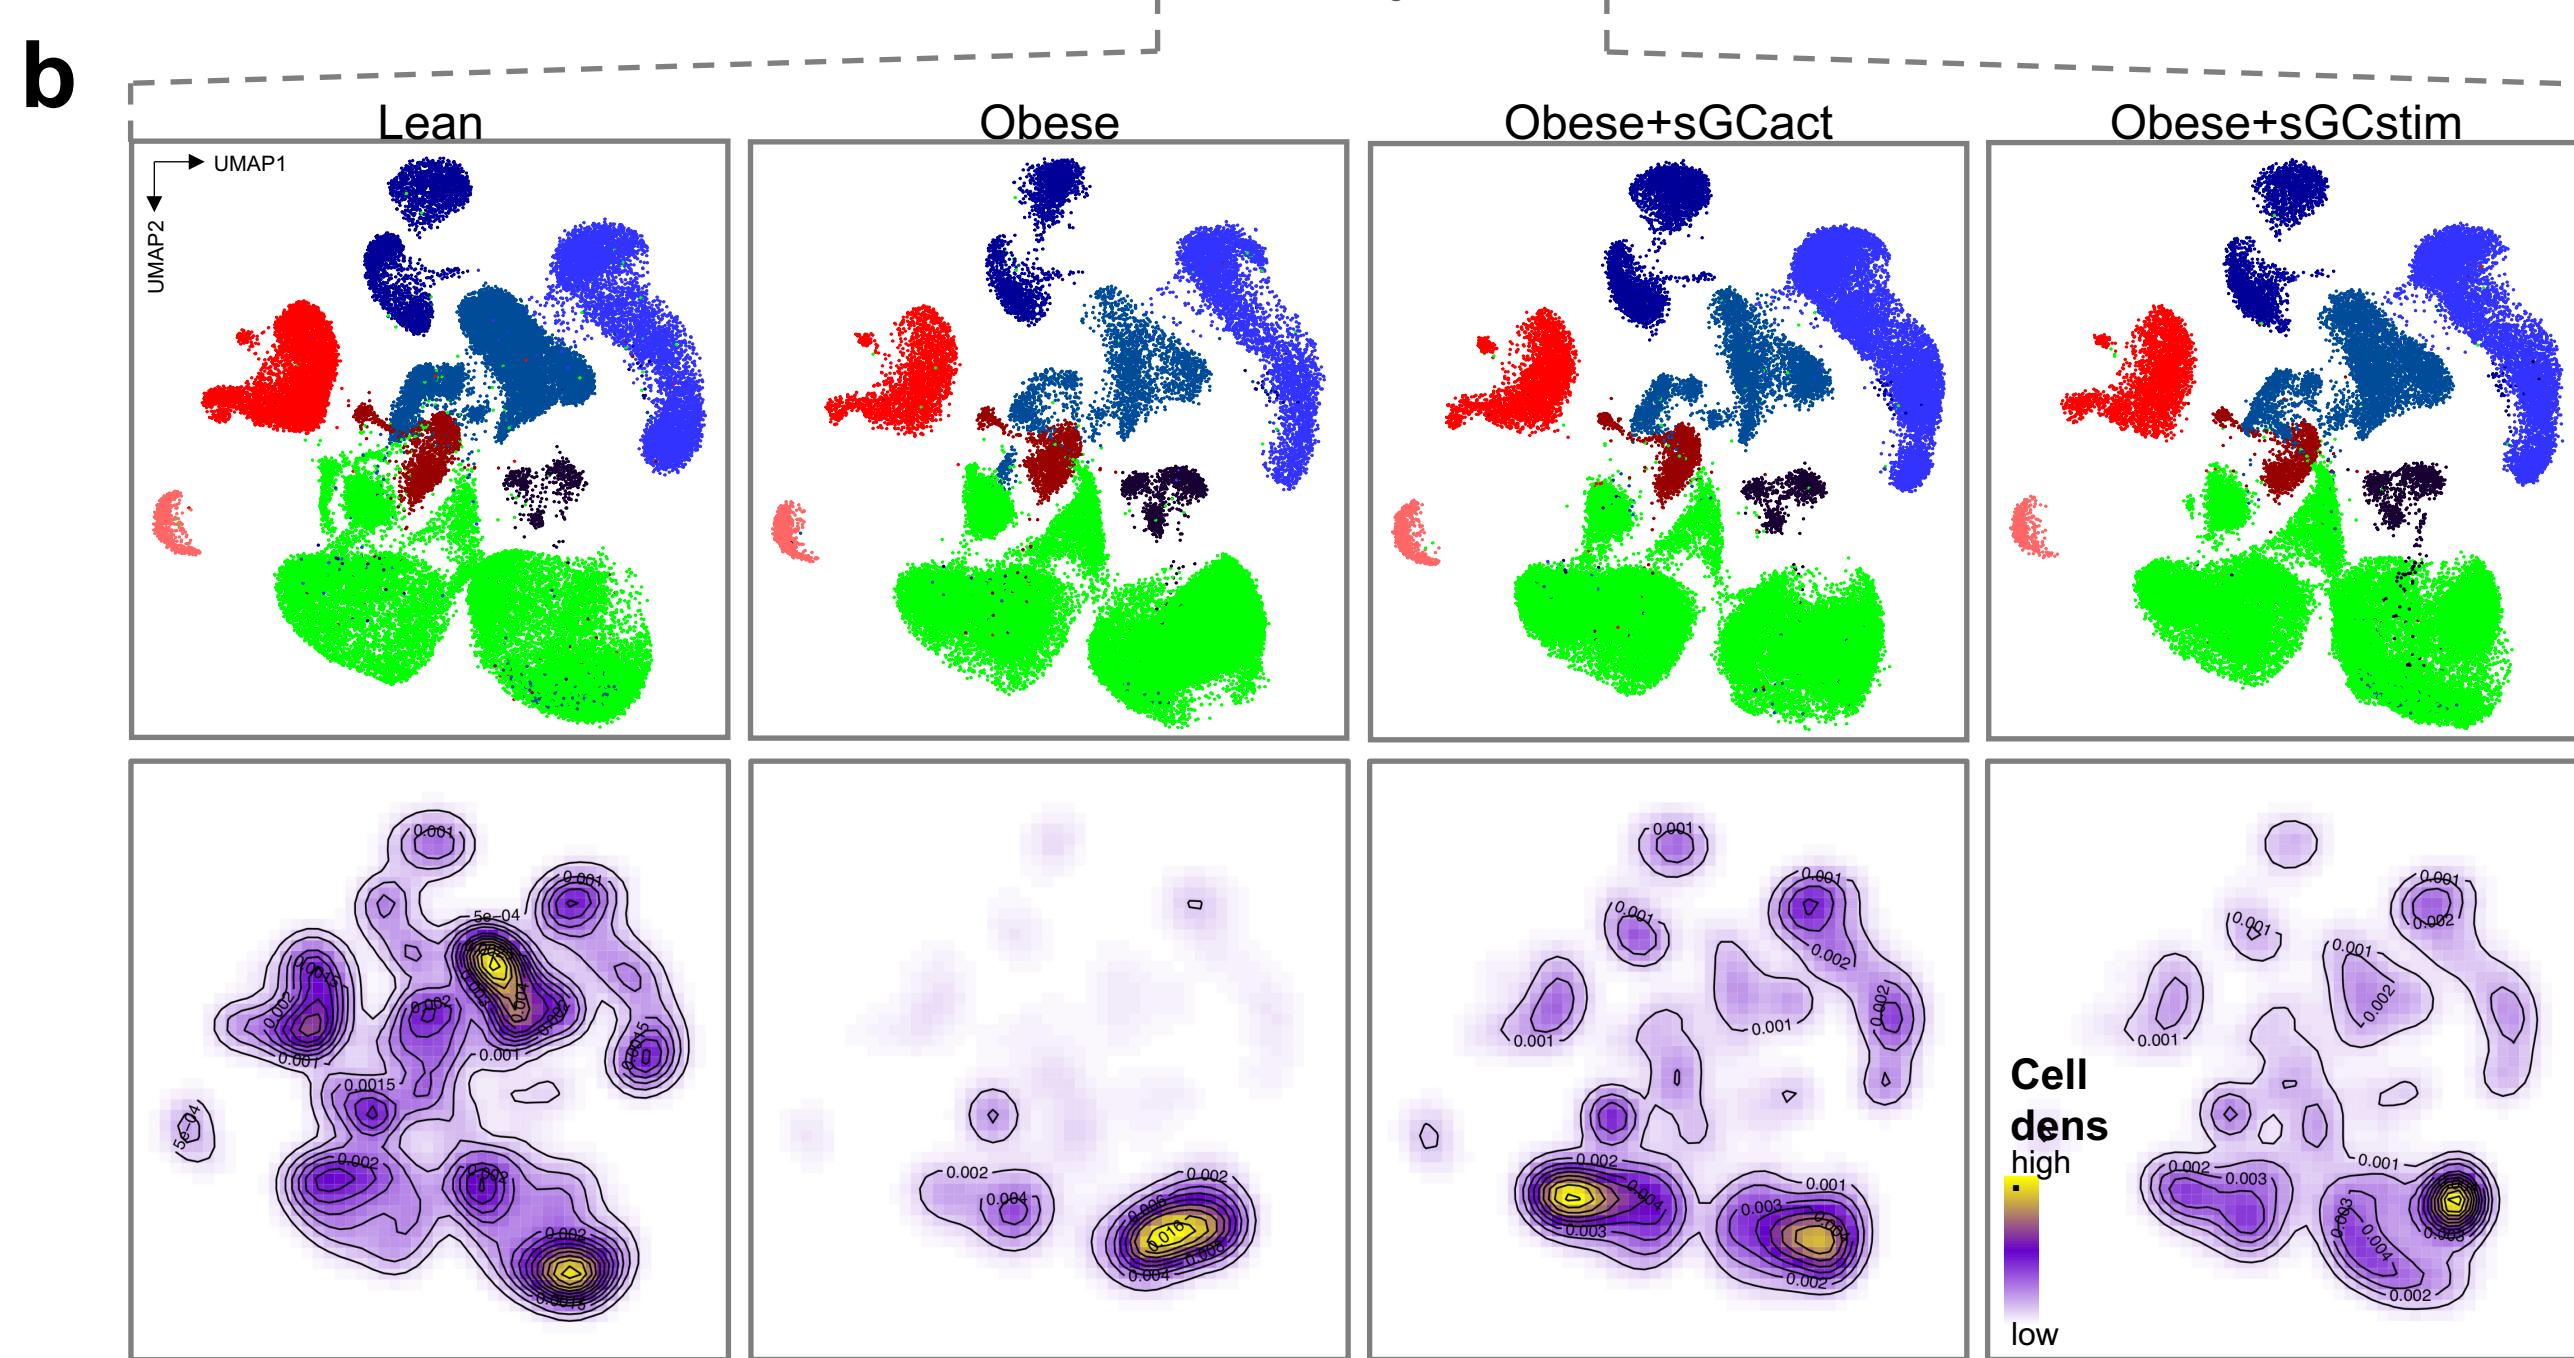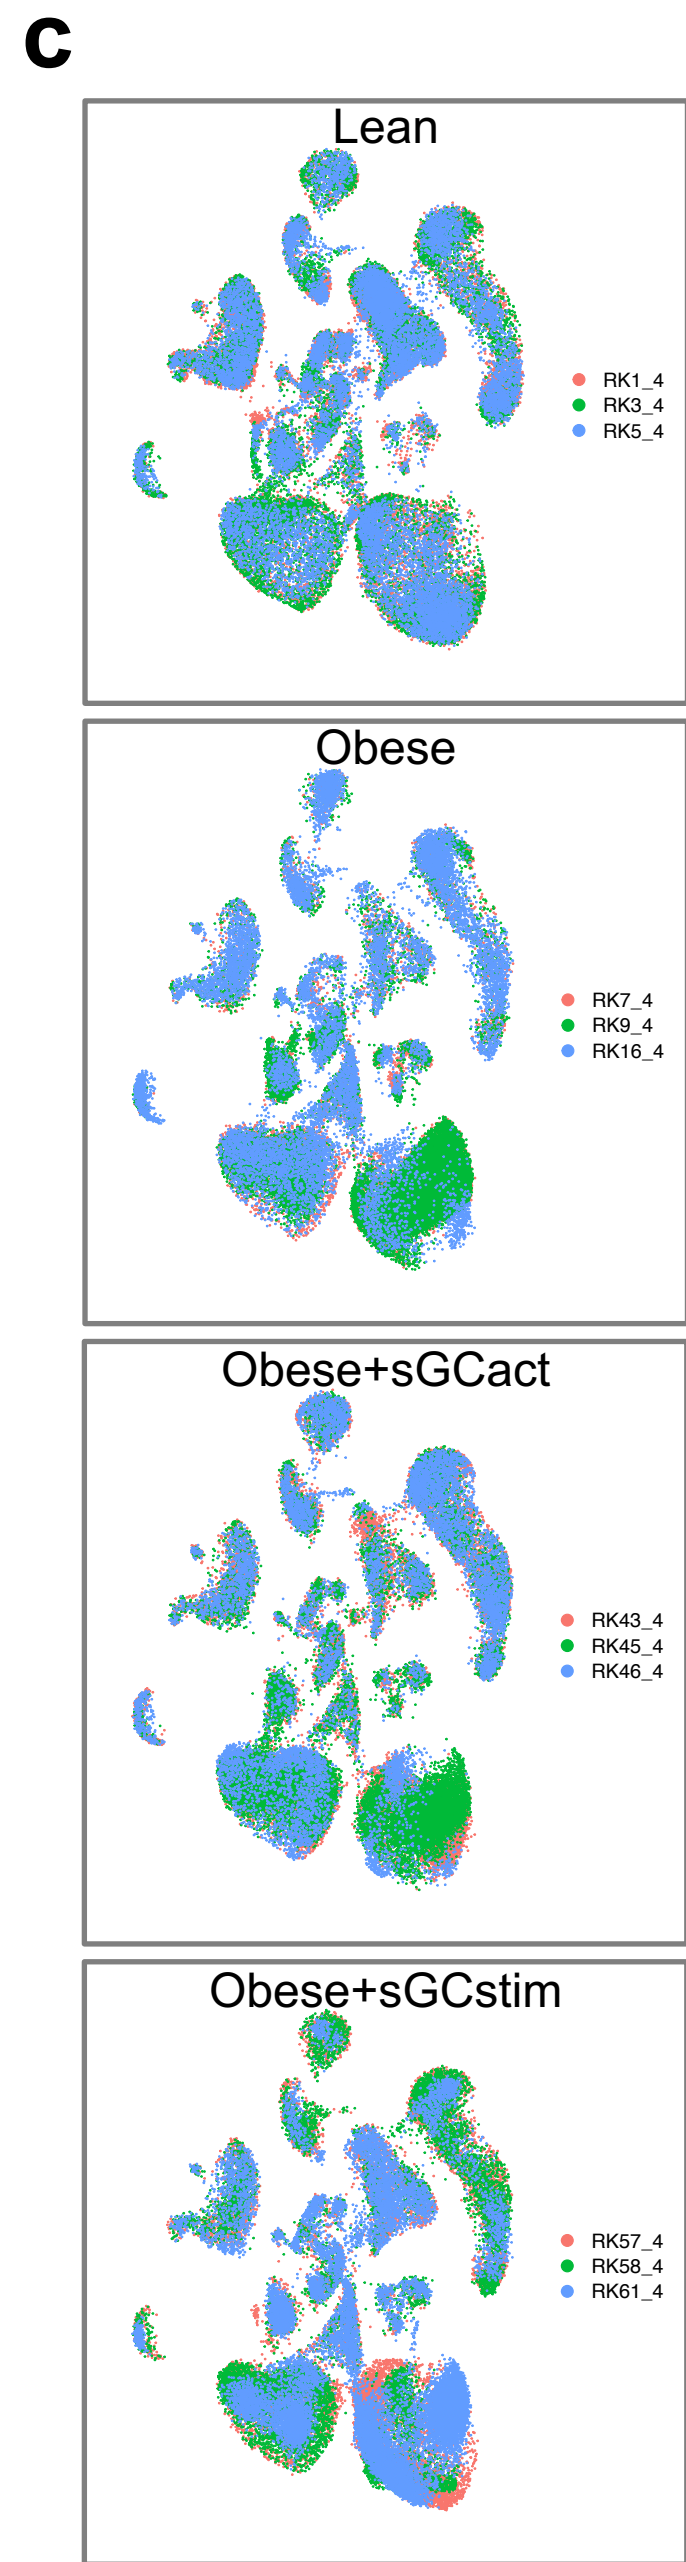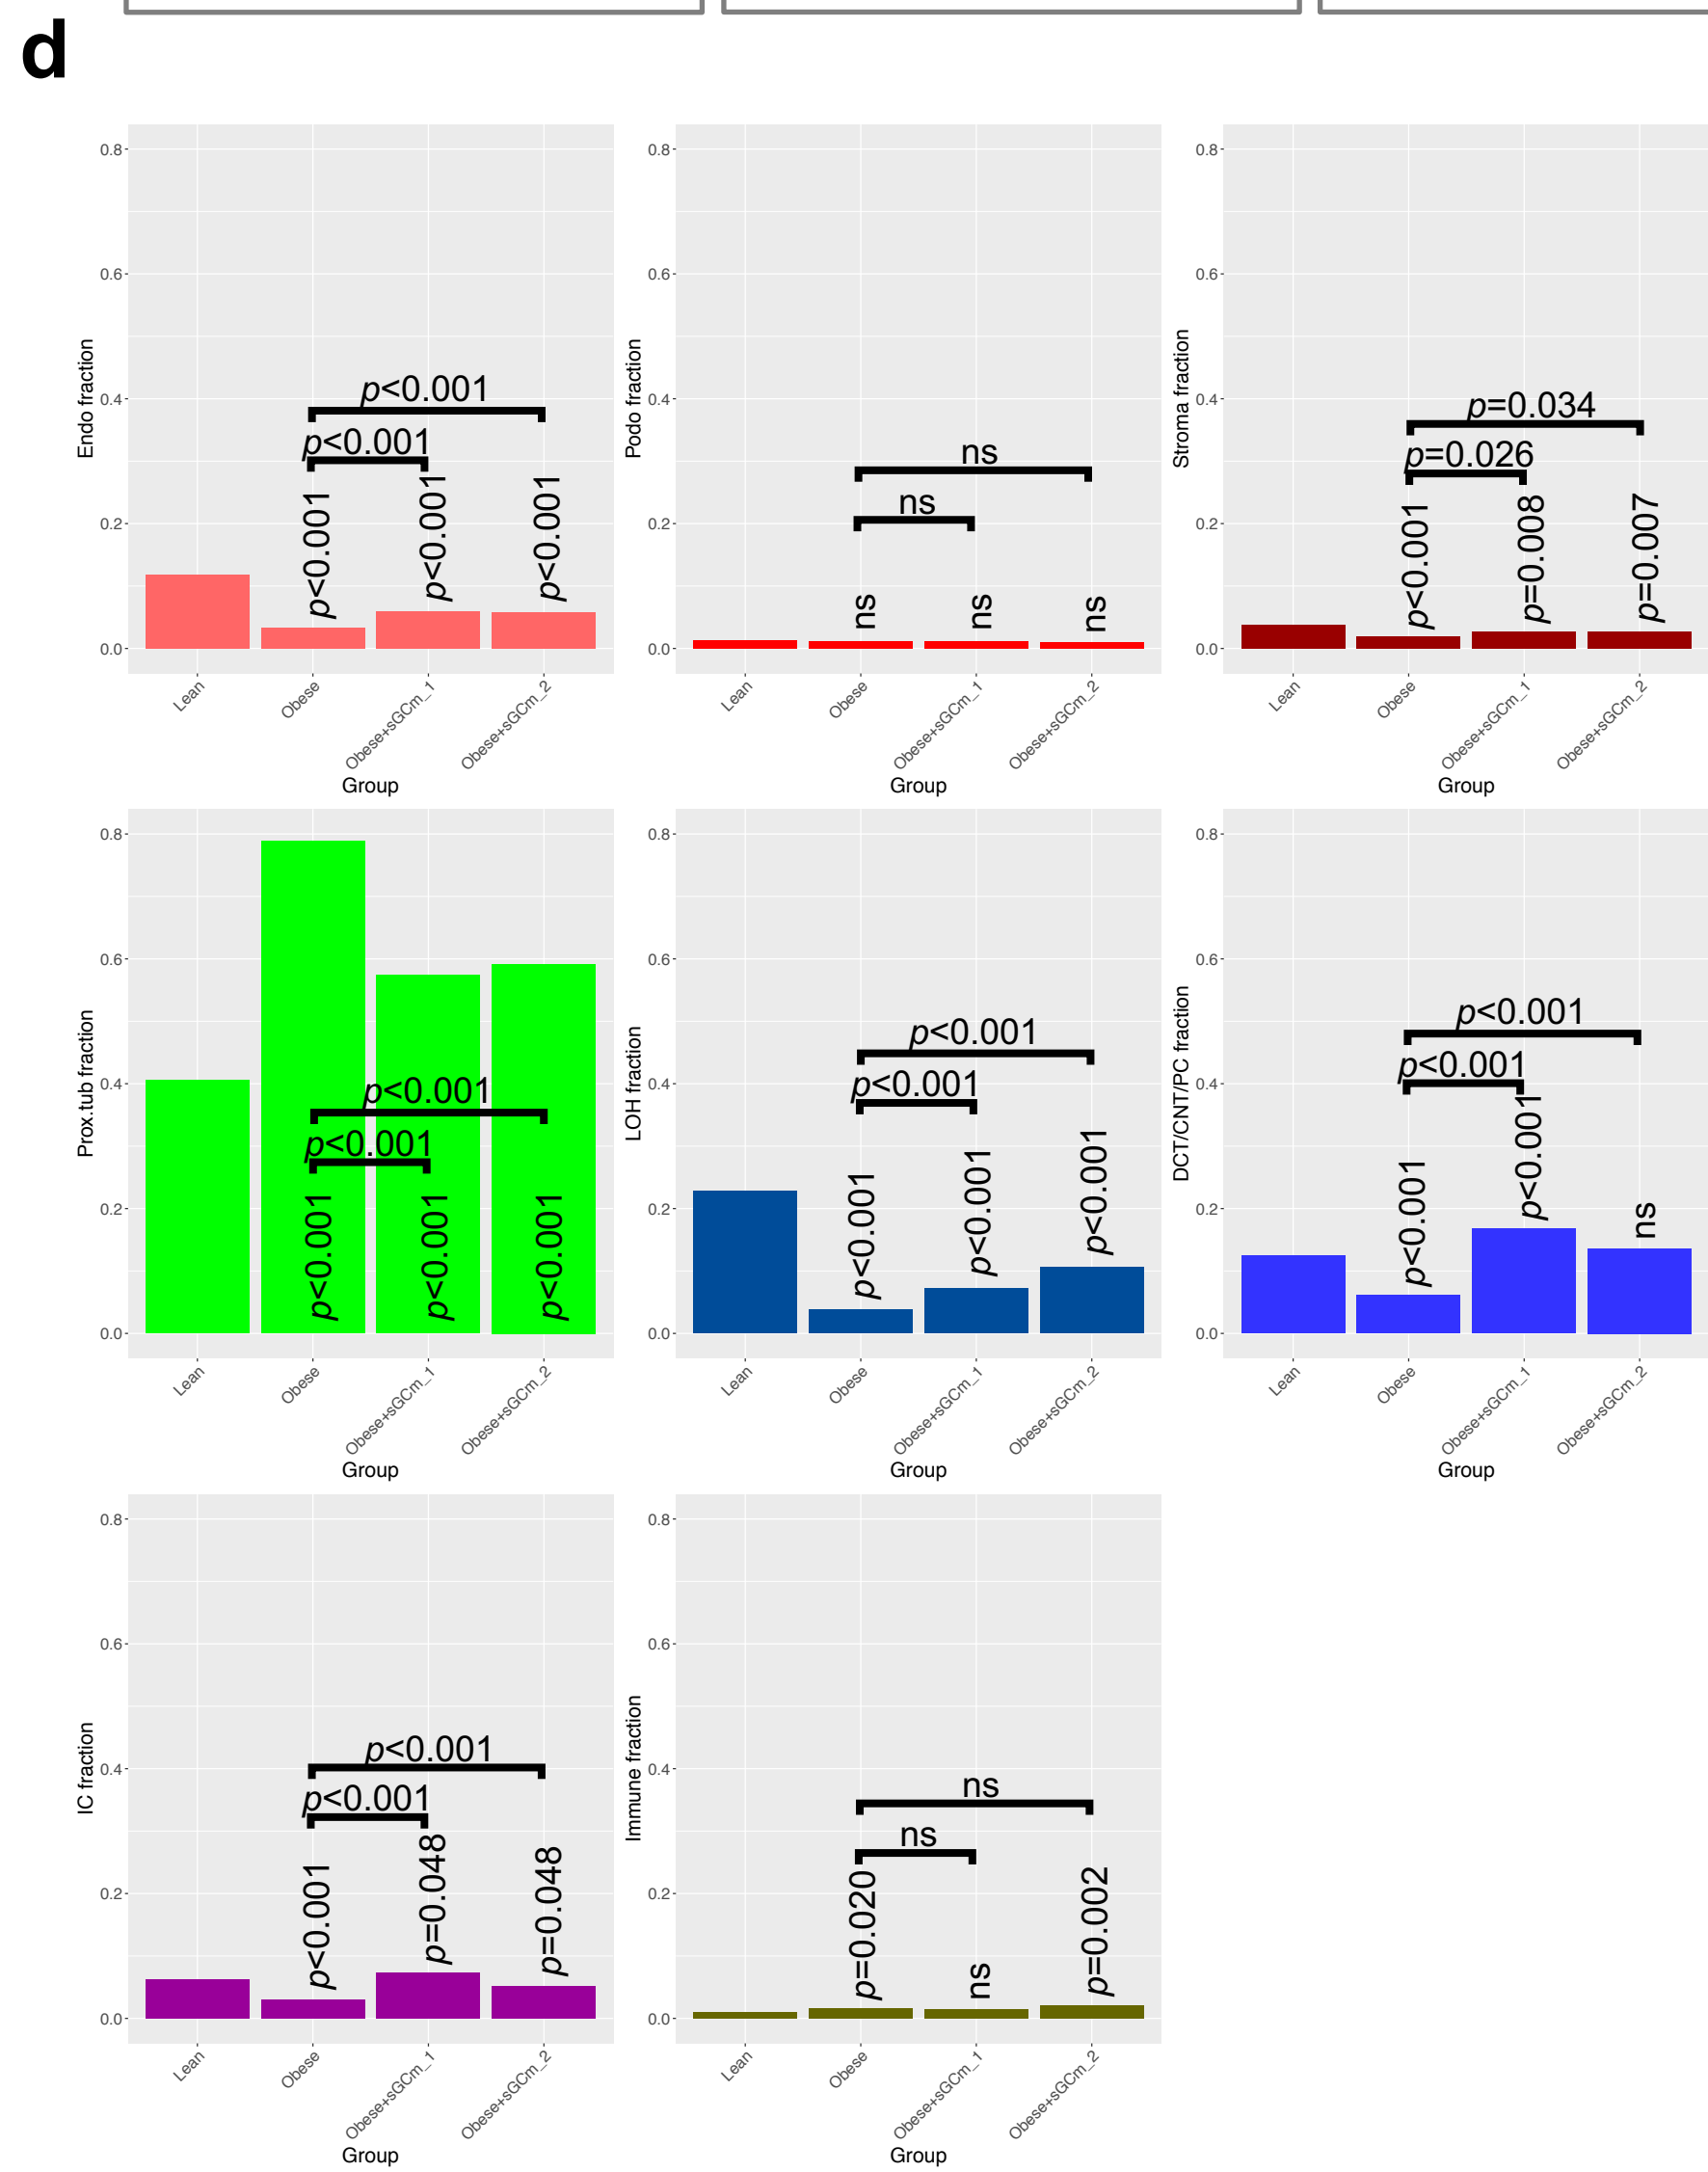



**Figure S3. Cell fraction changes. Related to Figure 2.**

- (a) Fractions of high-level clustering cell types across samples, experimental groups, and cell cycle phase, respectively; Endo, endothelial cell; Podo, podocyte; Stroma, stromal cell; Prox tub, proximal tubule; LOH, loop of Henle; DCT/CNT/PC, distal convoluted tubule/connecting tubule/collecting duct principal cell; IC, collecting duct intercalated cell; Immune, immune cell.
- (b) Integrated UMAP (top) and density plots (bottom) corresponding to **Fig. 2a**, stratified by experimental group.
- (c) Integrated UMAP stratified by experimental group and colored by individual sample demonstrates negligible within-group heterogeneity.
- (d) Cell fractions of high-level clusters stratified by experimental group. Statistical significance for comparisons was derived using differential proportion analysis, with a mean error of 0.1 over 100,000 iterations; p values are given for comparisons between Lean and (un-)treated Obese groups and between untreated Obese and treated Obese groups, respectively; ns, not significant.

**a****DEG Obese vs. Lean**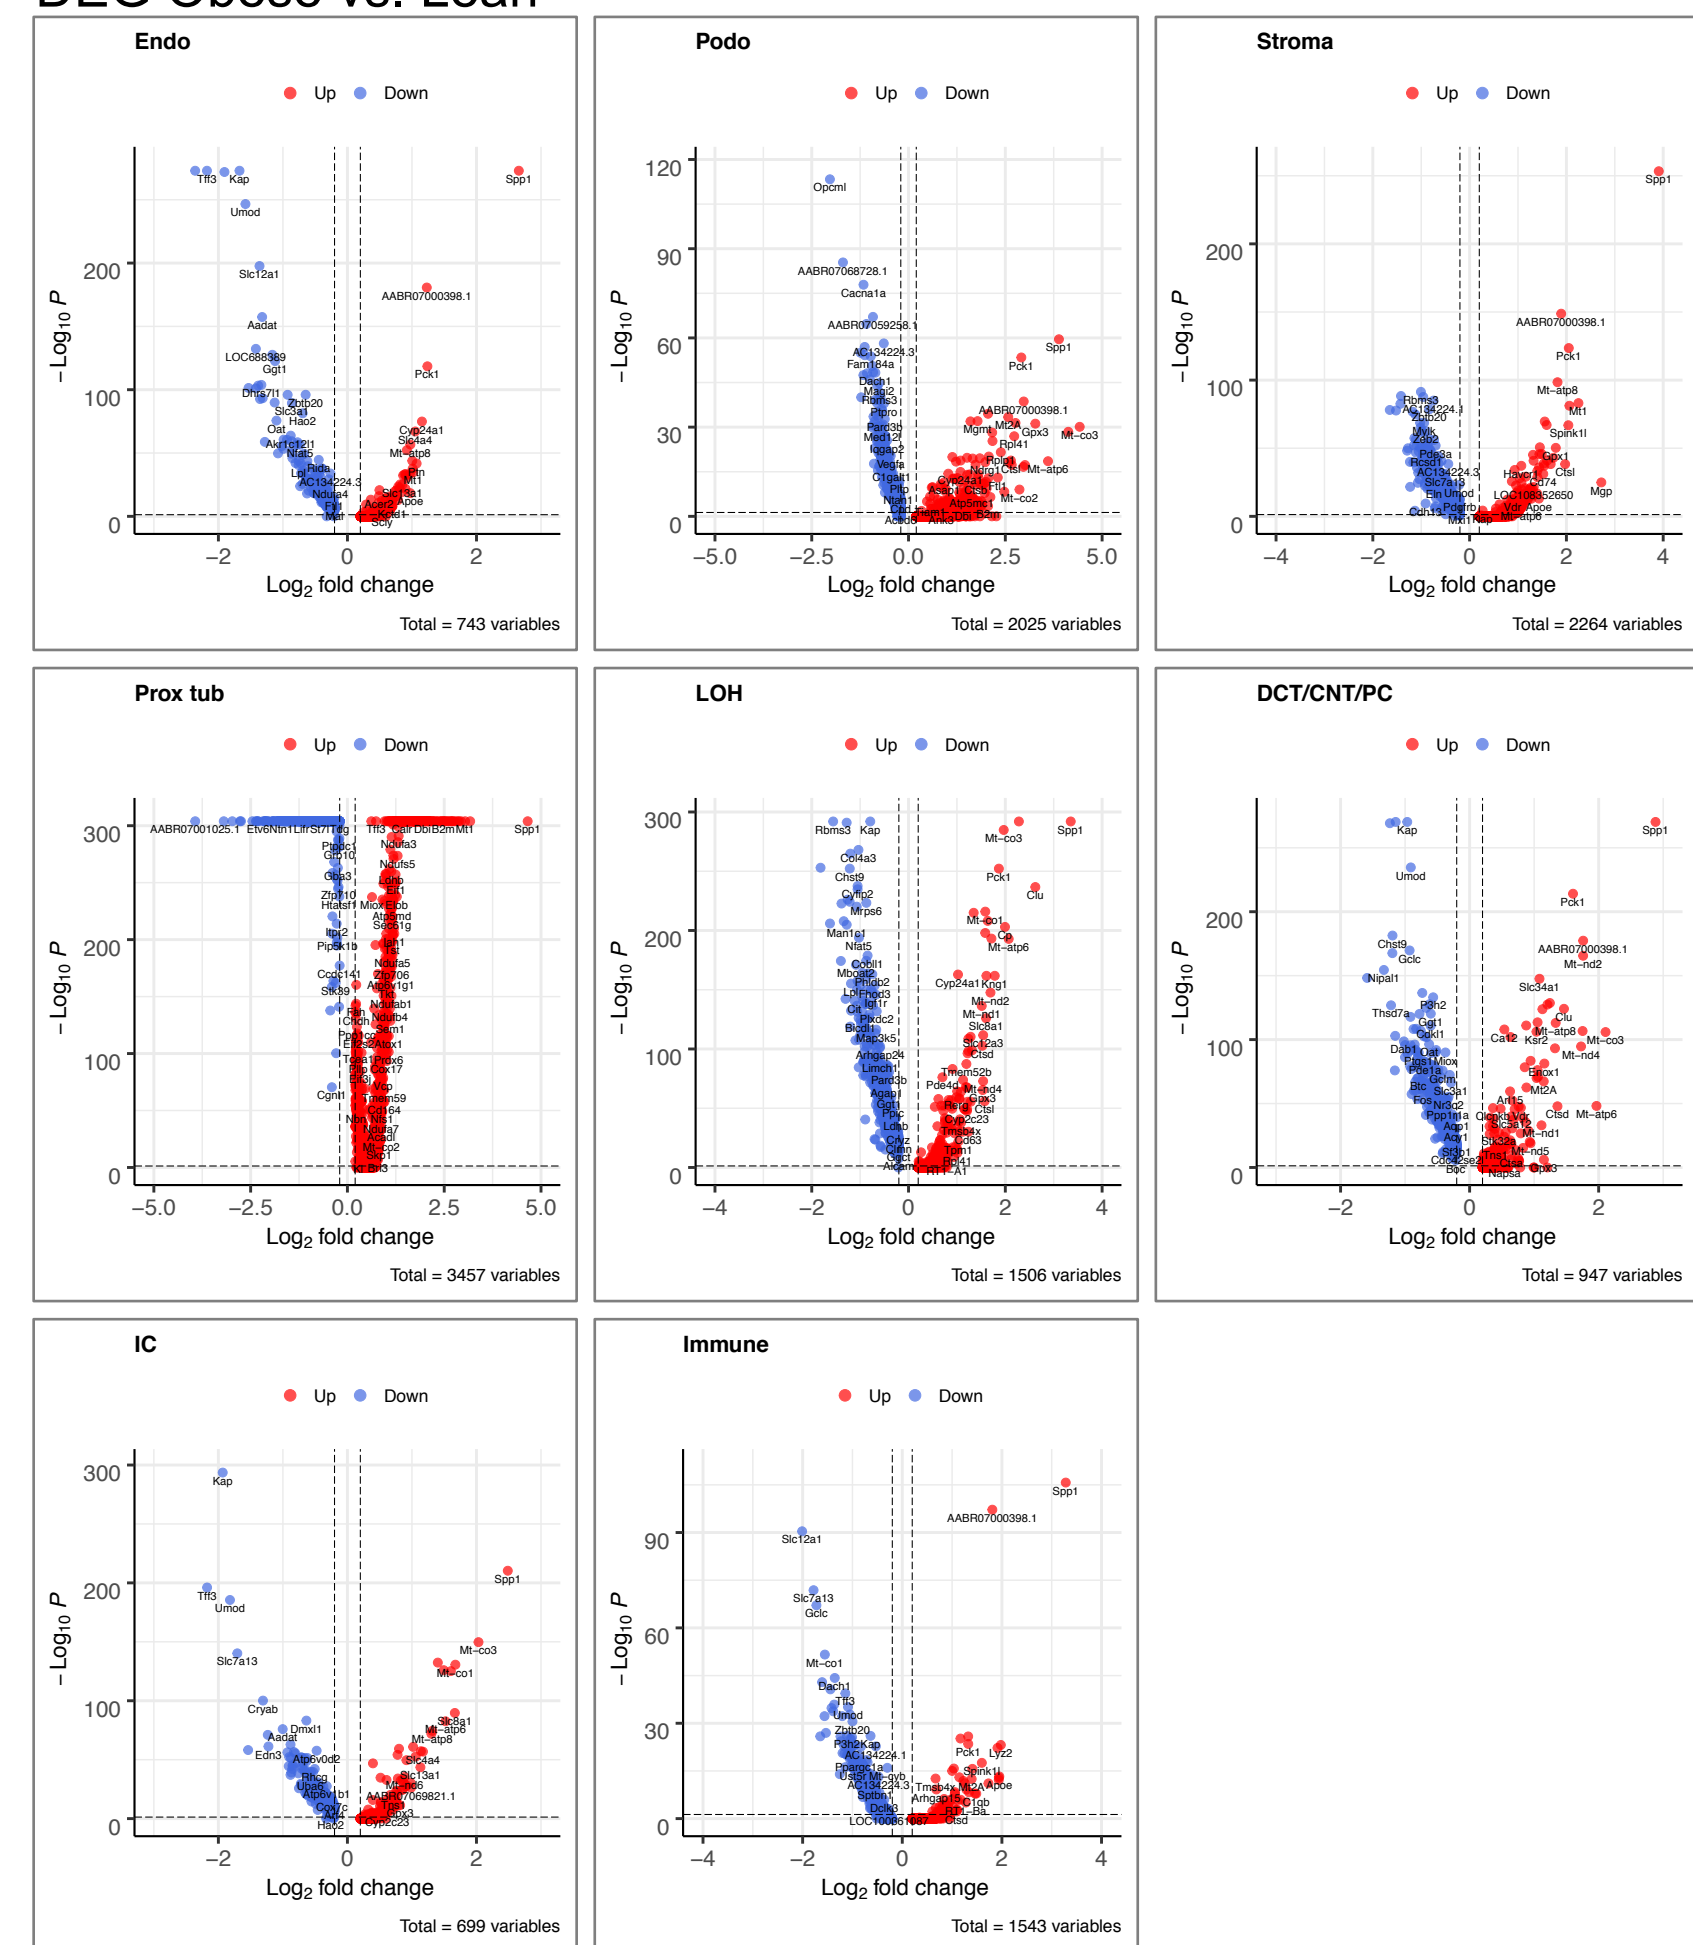**b****DEG Obese+sGCact vs. Obese**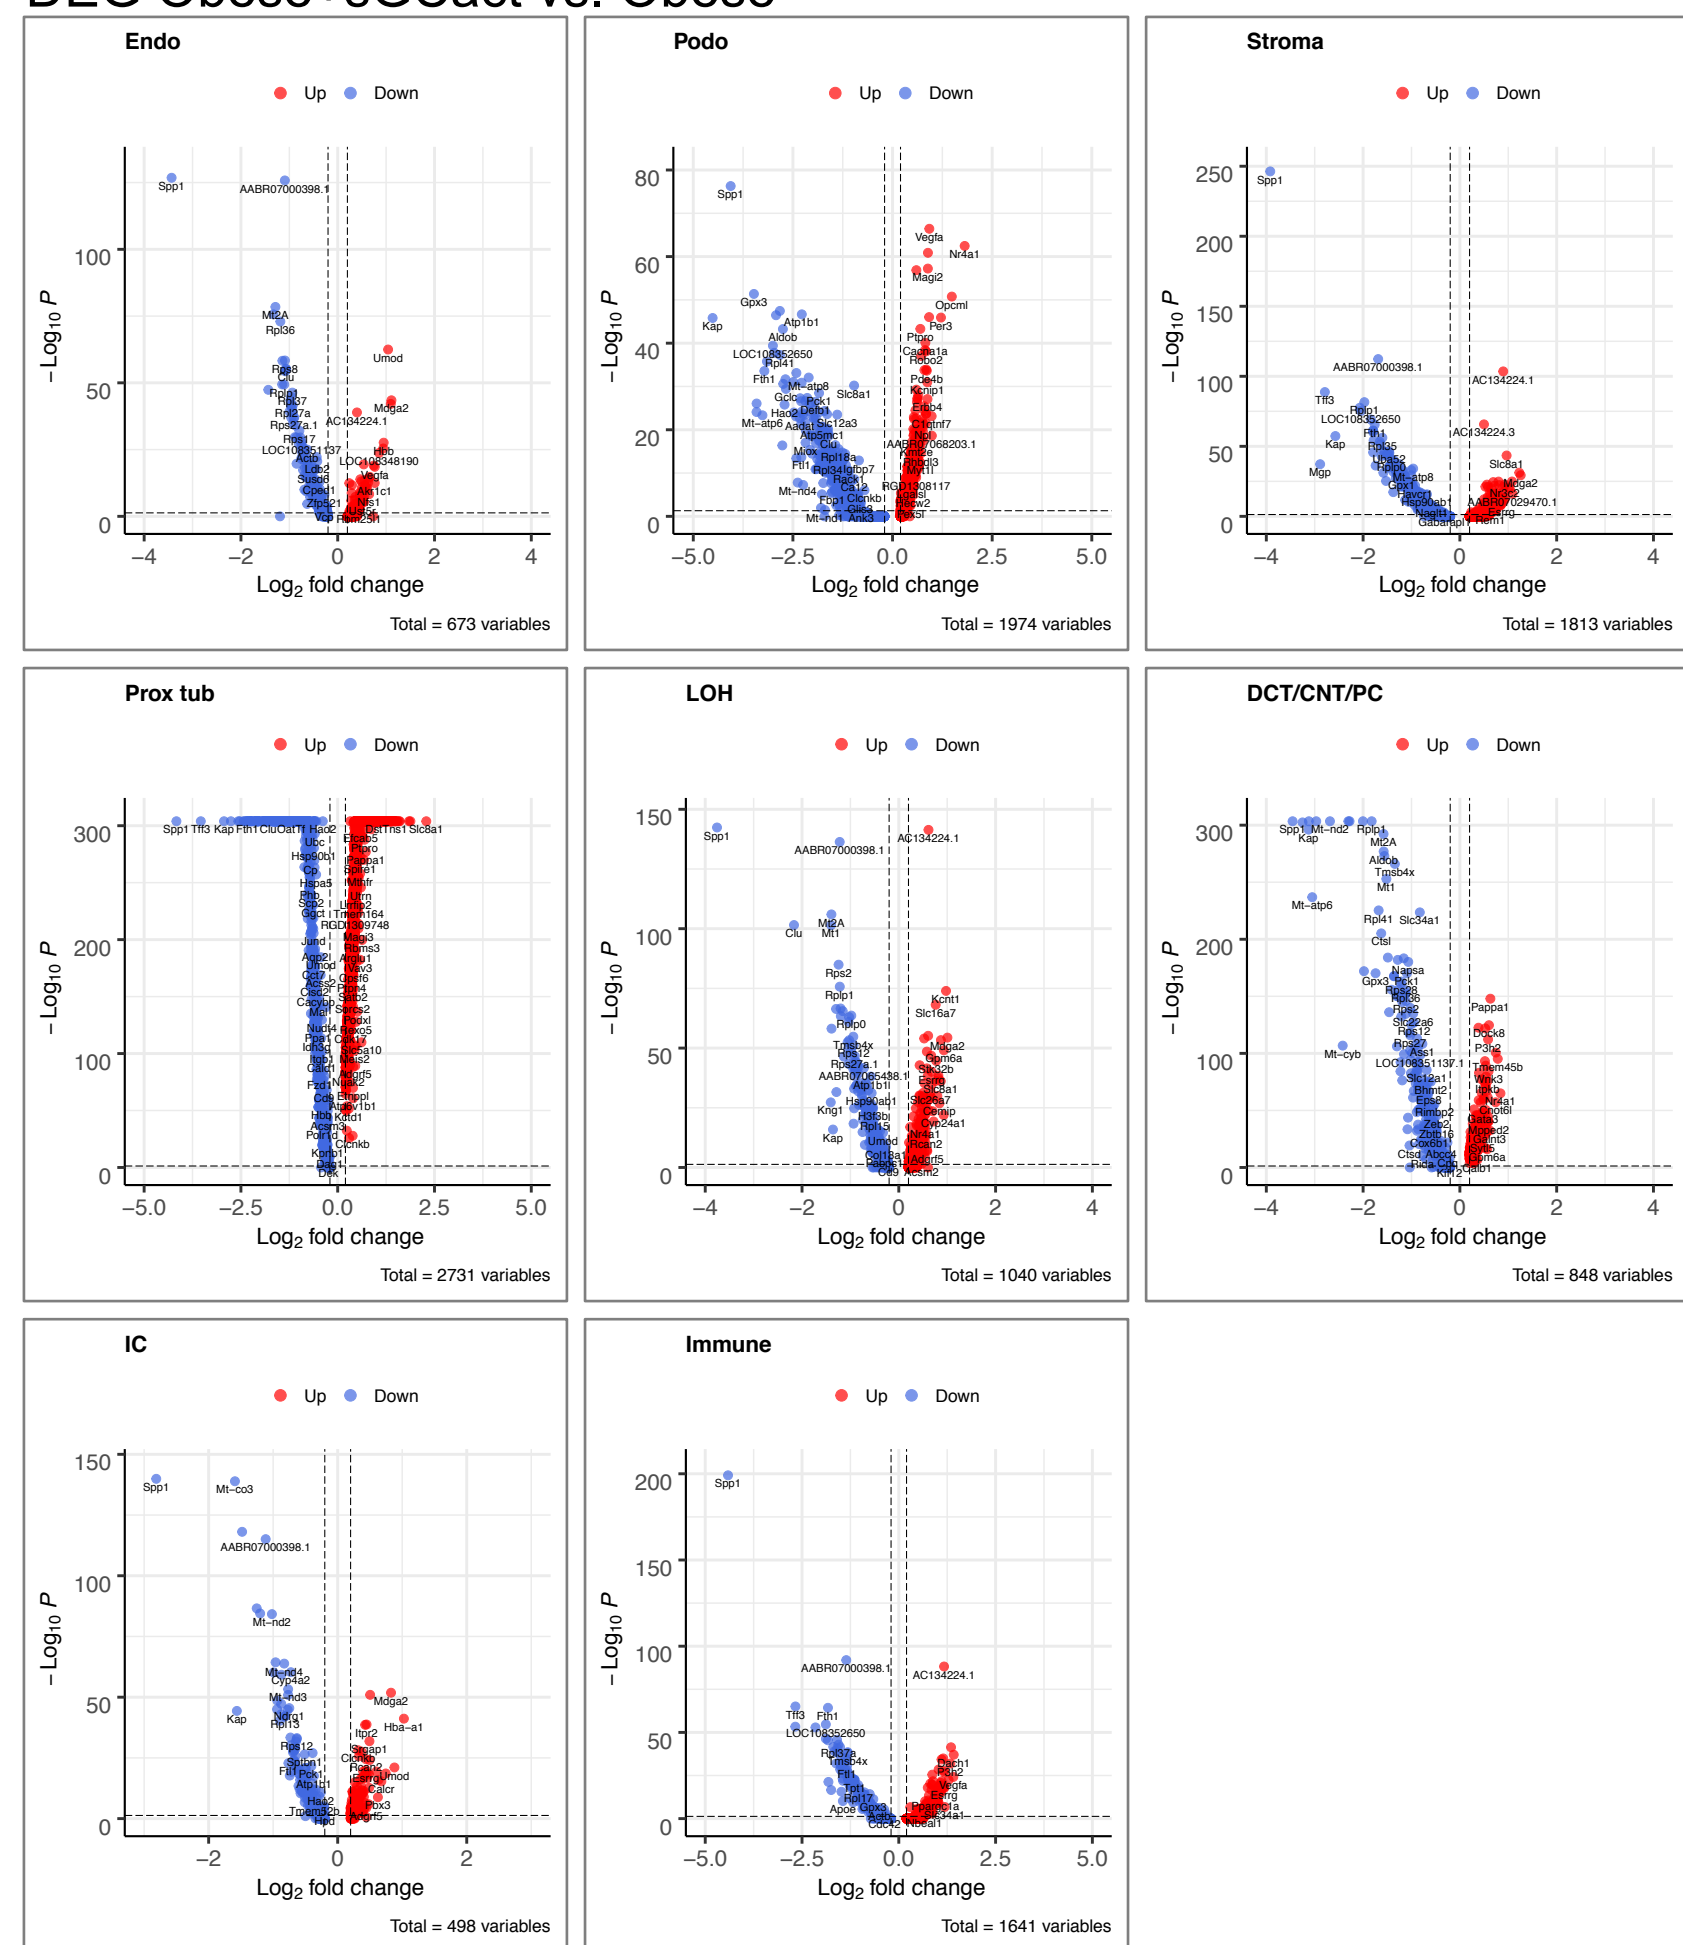**c****DEG Obese+sGCstim vs. Obese**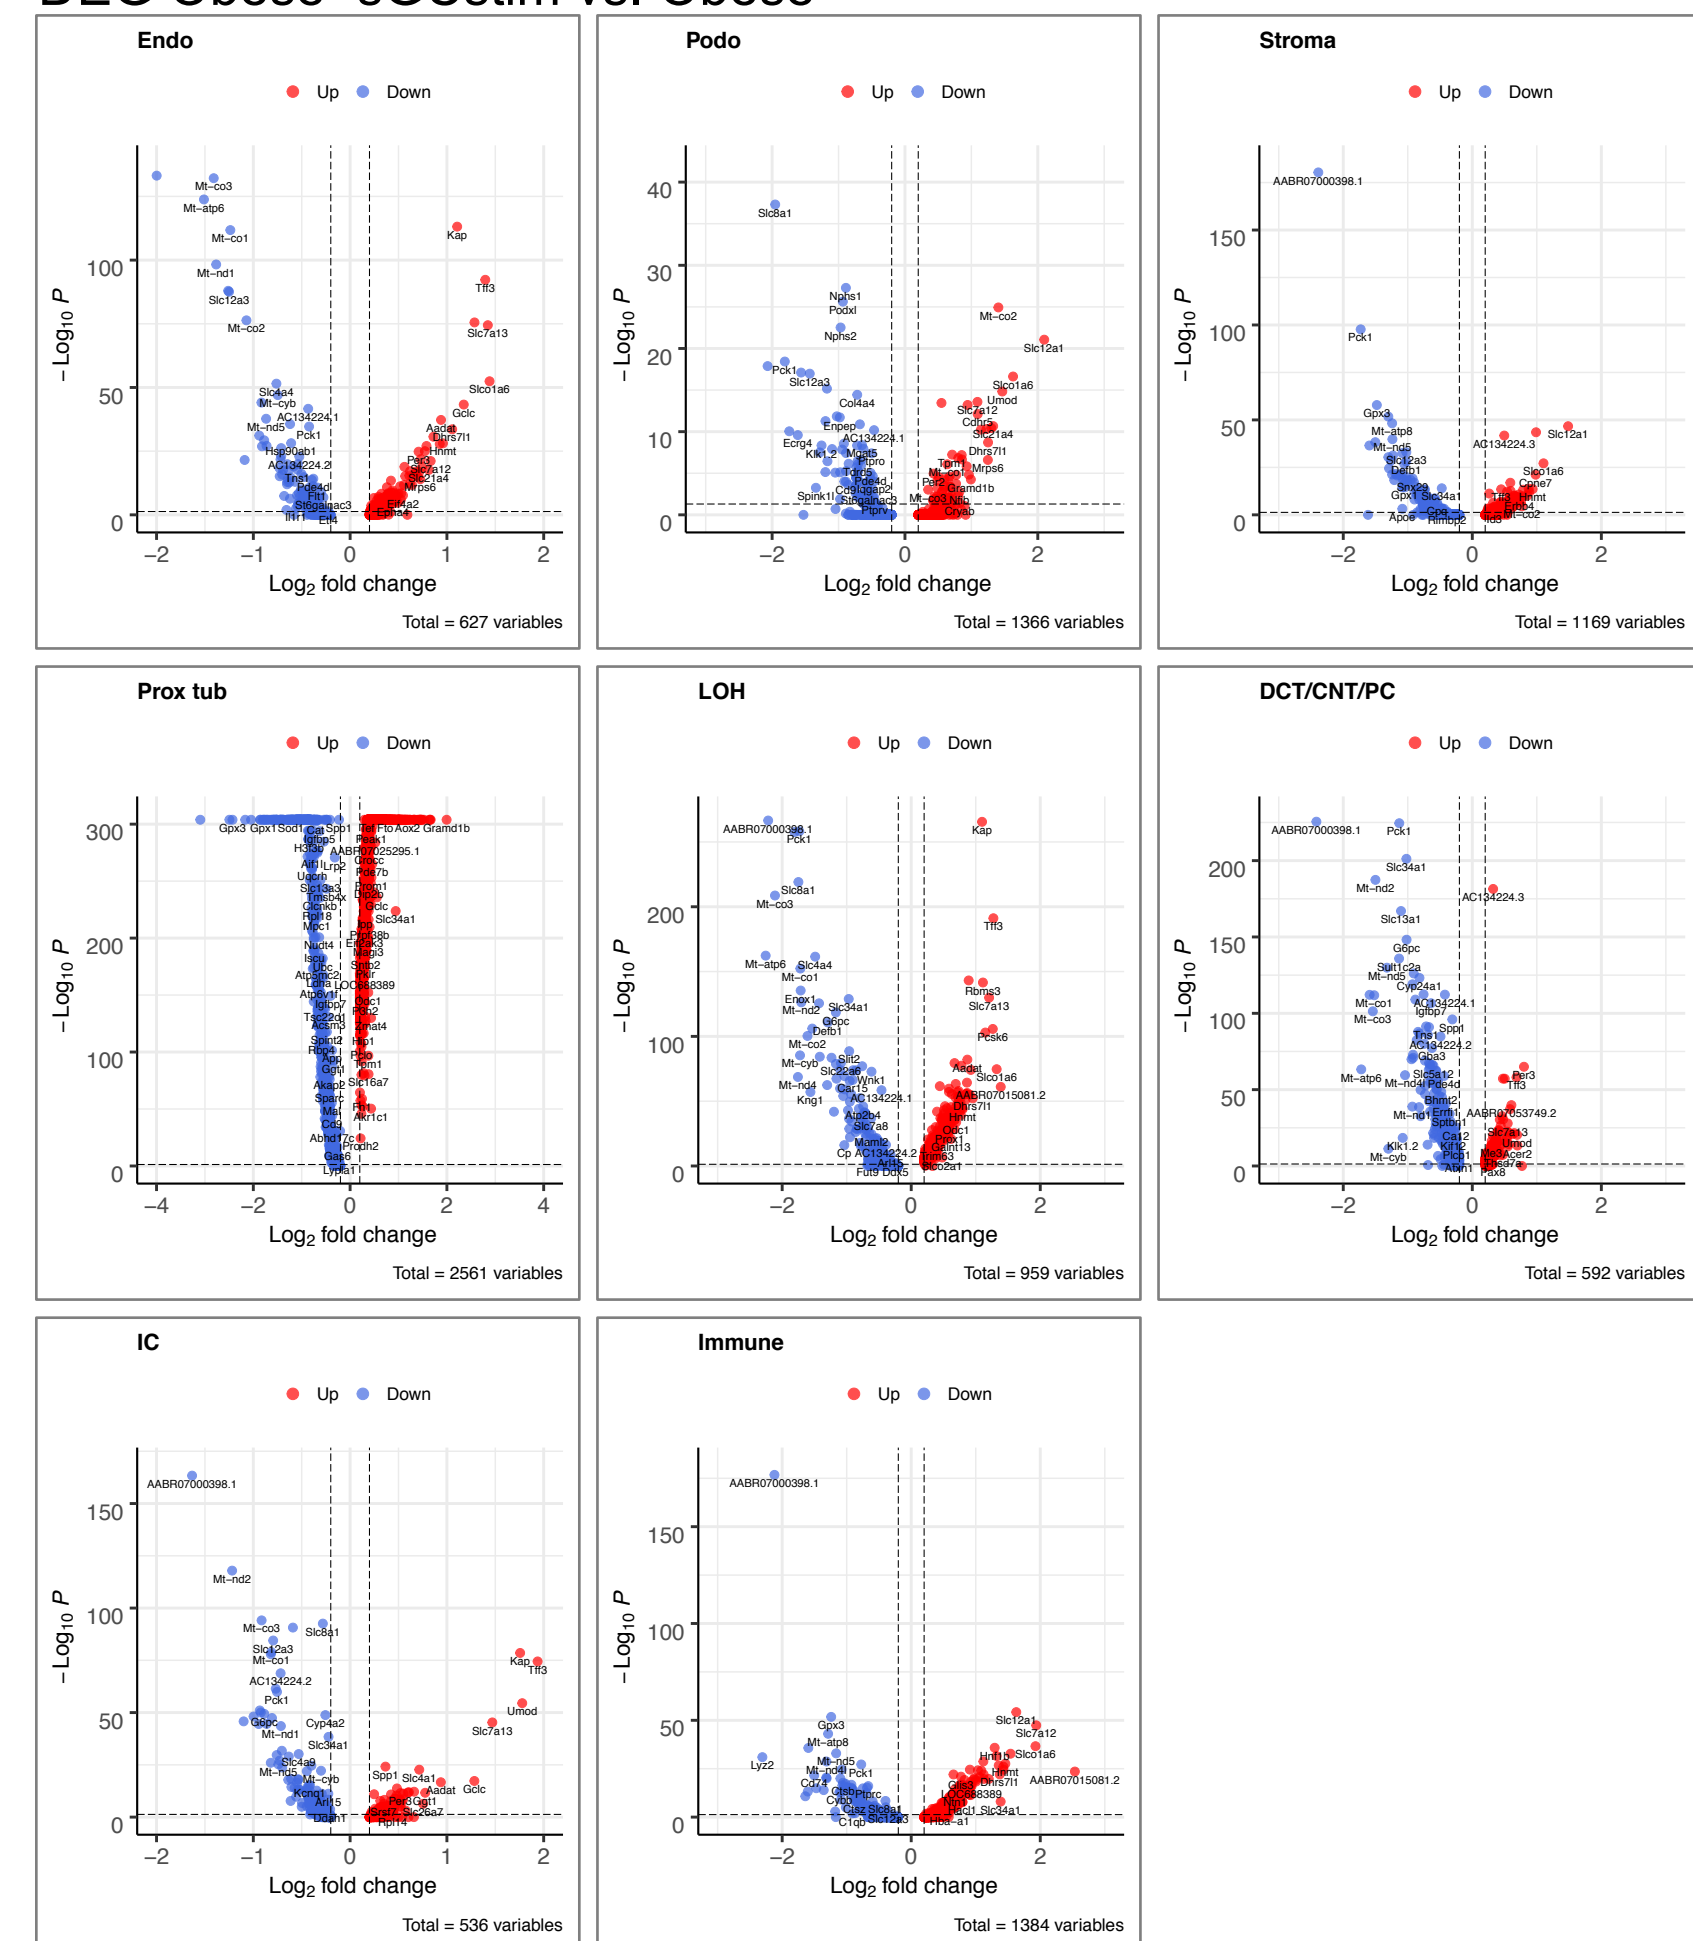

**Figure S4. Differentially expressed genes. Related to Figure 2.**

(a-c) Volcano plots of differentially expressed genes (DEGs) comparing Obese vs. Lean **(a)**, Obese+sGCact vs. Obese **(b)**, and Obese+sGCstim vs. Obese samples **(c)**, respectively. Comparisons are given separately for high-level cell types. X axes indicate  $\log_2$ -fold change (Model-based Analysis of Single-cell Transcriptomics, MAST) and y axis indicates statistical significance-adjusted  $p = -\log_{10}$ . Endo, endothelial cell; Podo, podocyte; Stroma, stromal cell; Prox tub, proximal tubule; LOH, loop of Henle; DCT/CNT/PC, distal convoluted tubule/connecting tubule/collecting duct principal cell; IC, collecting duct intercalated cell; Immune, immune cell.

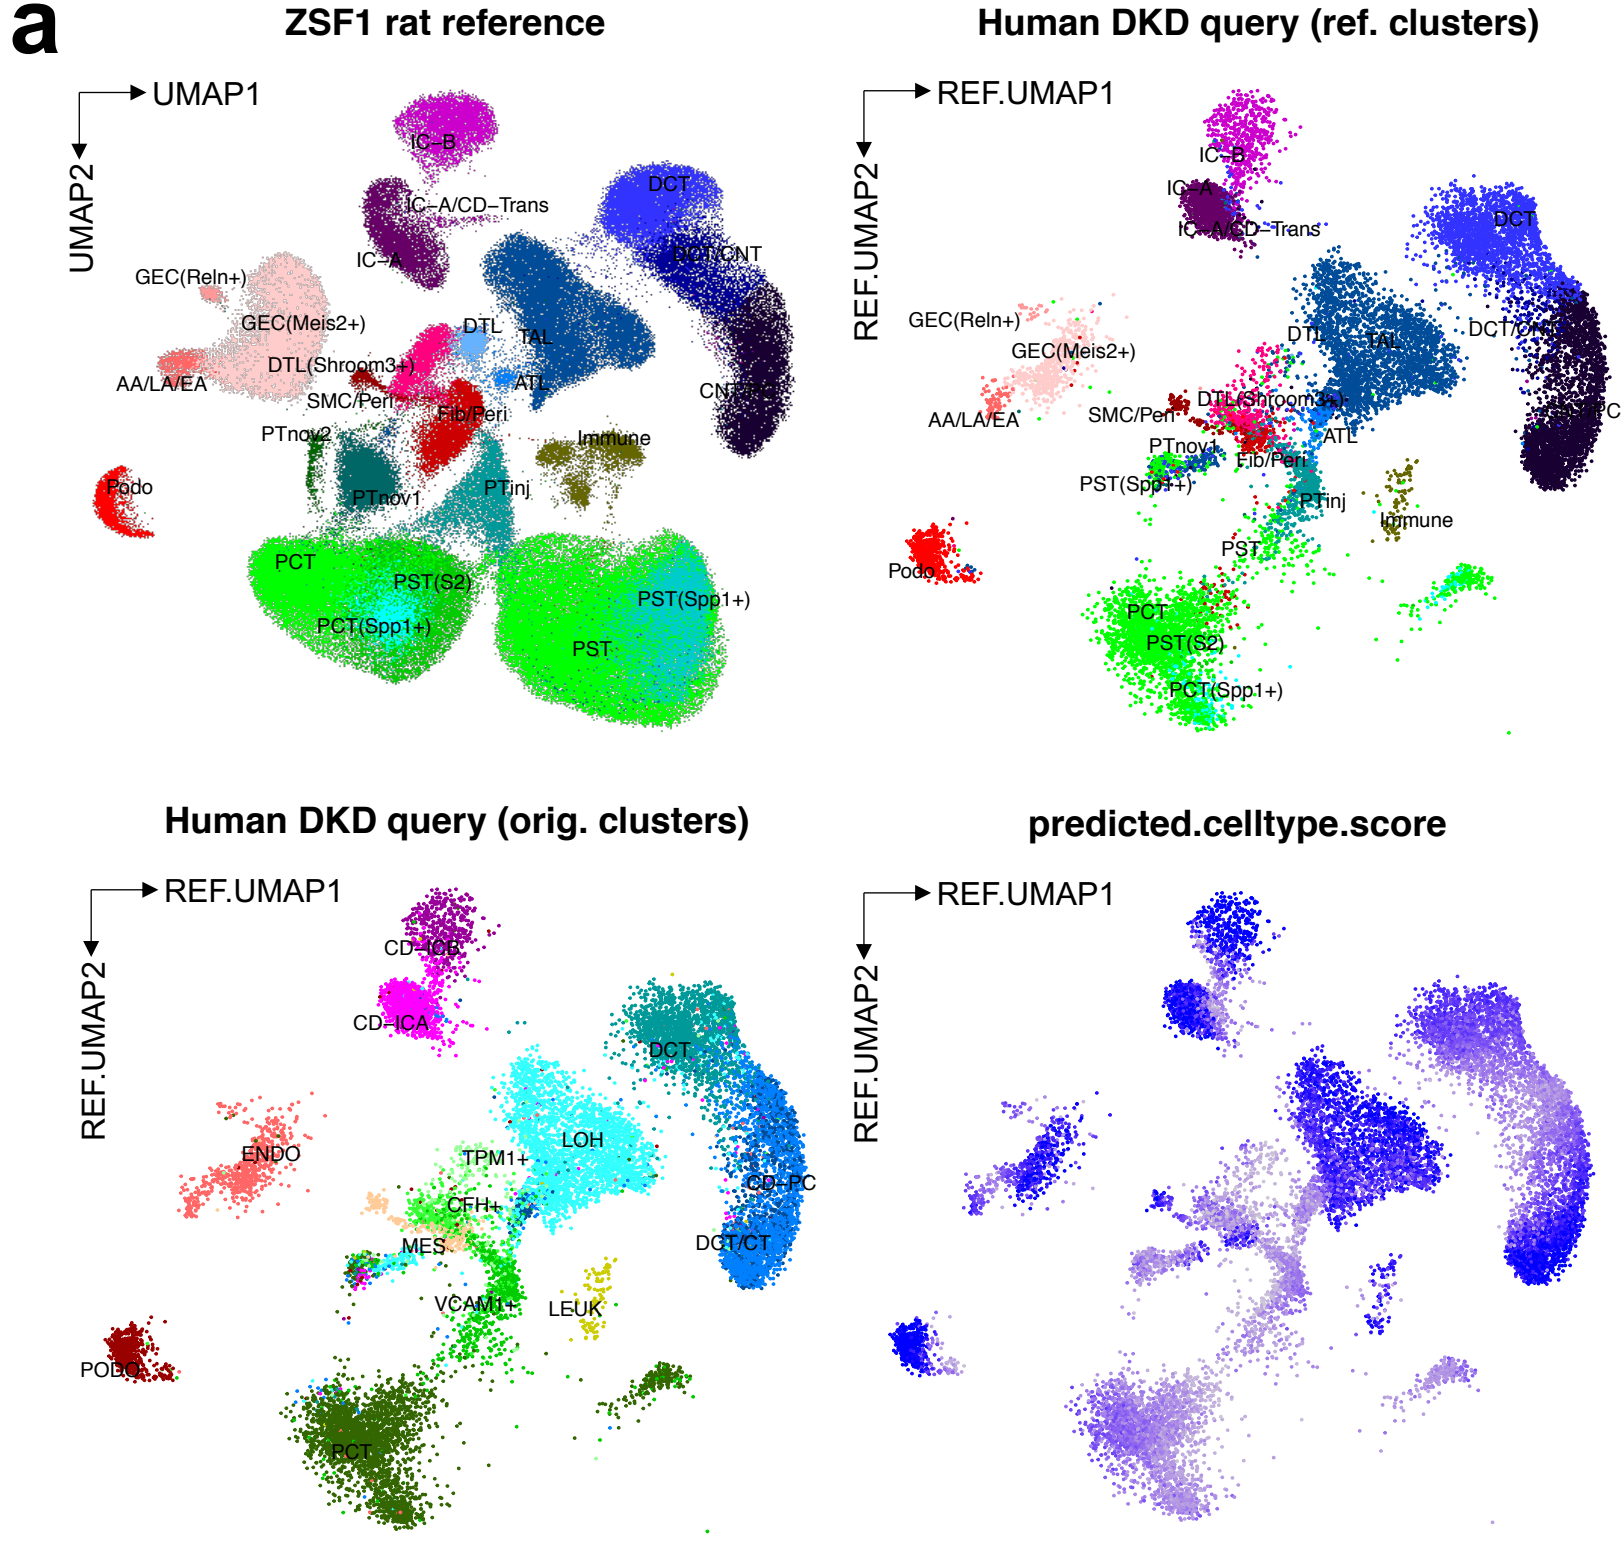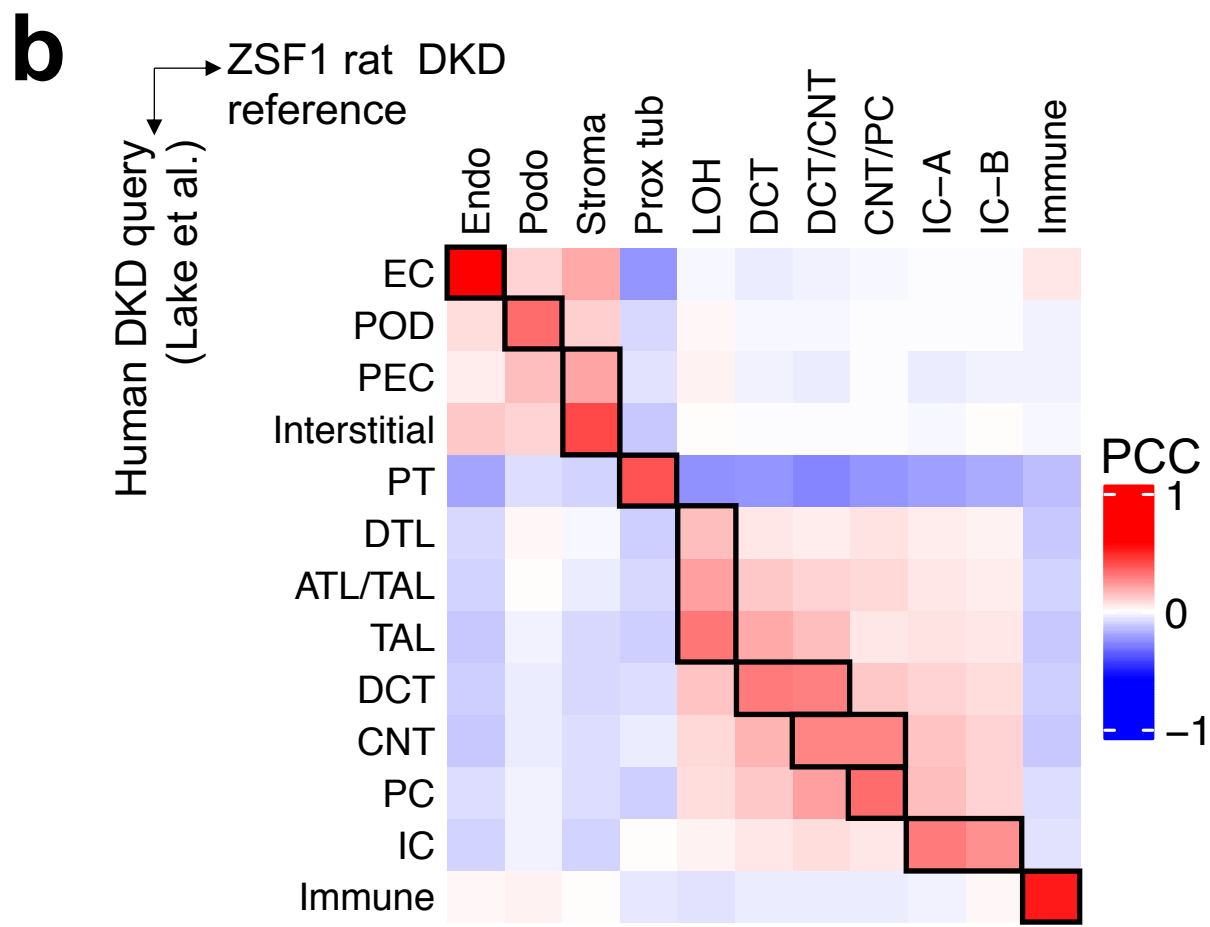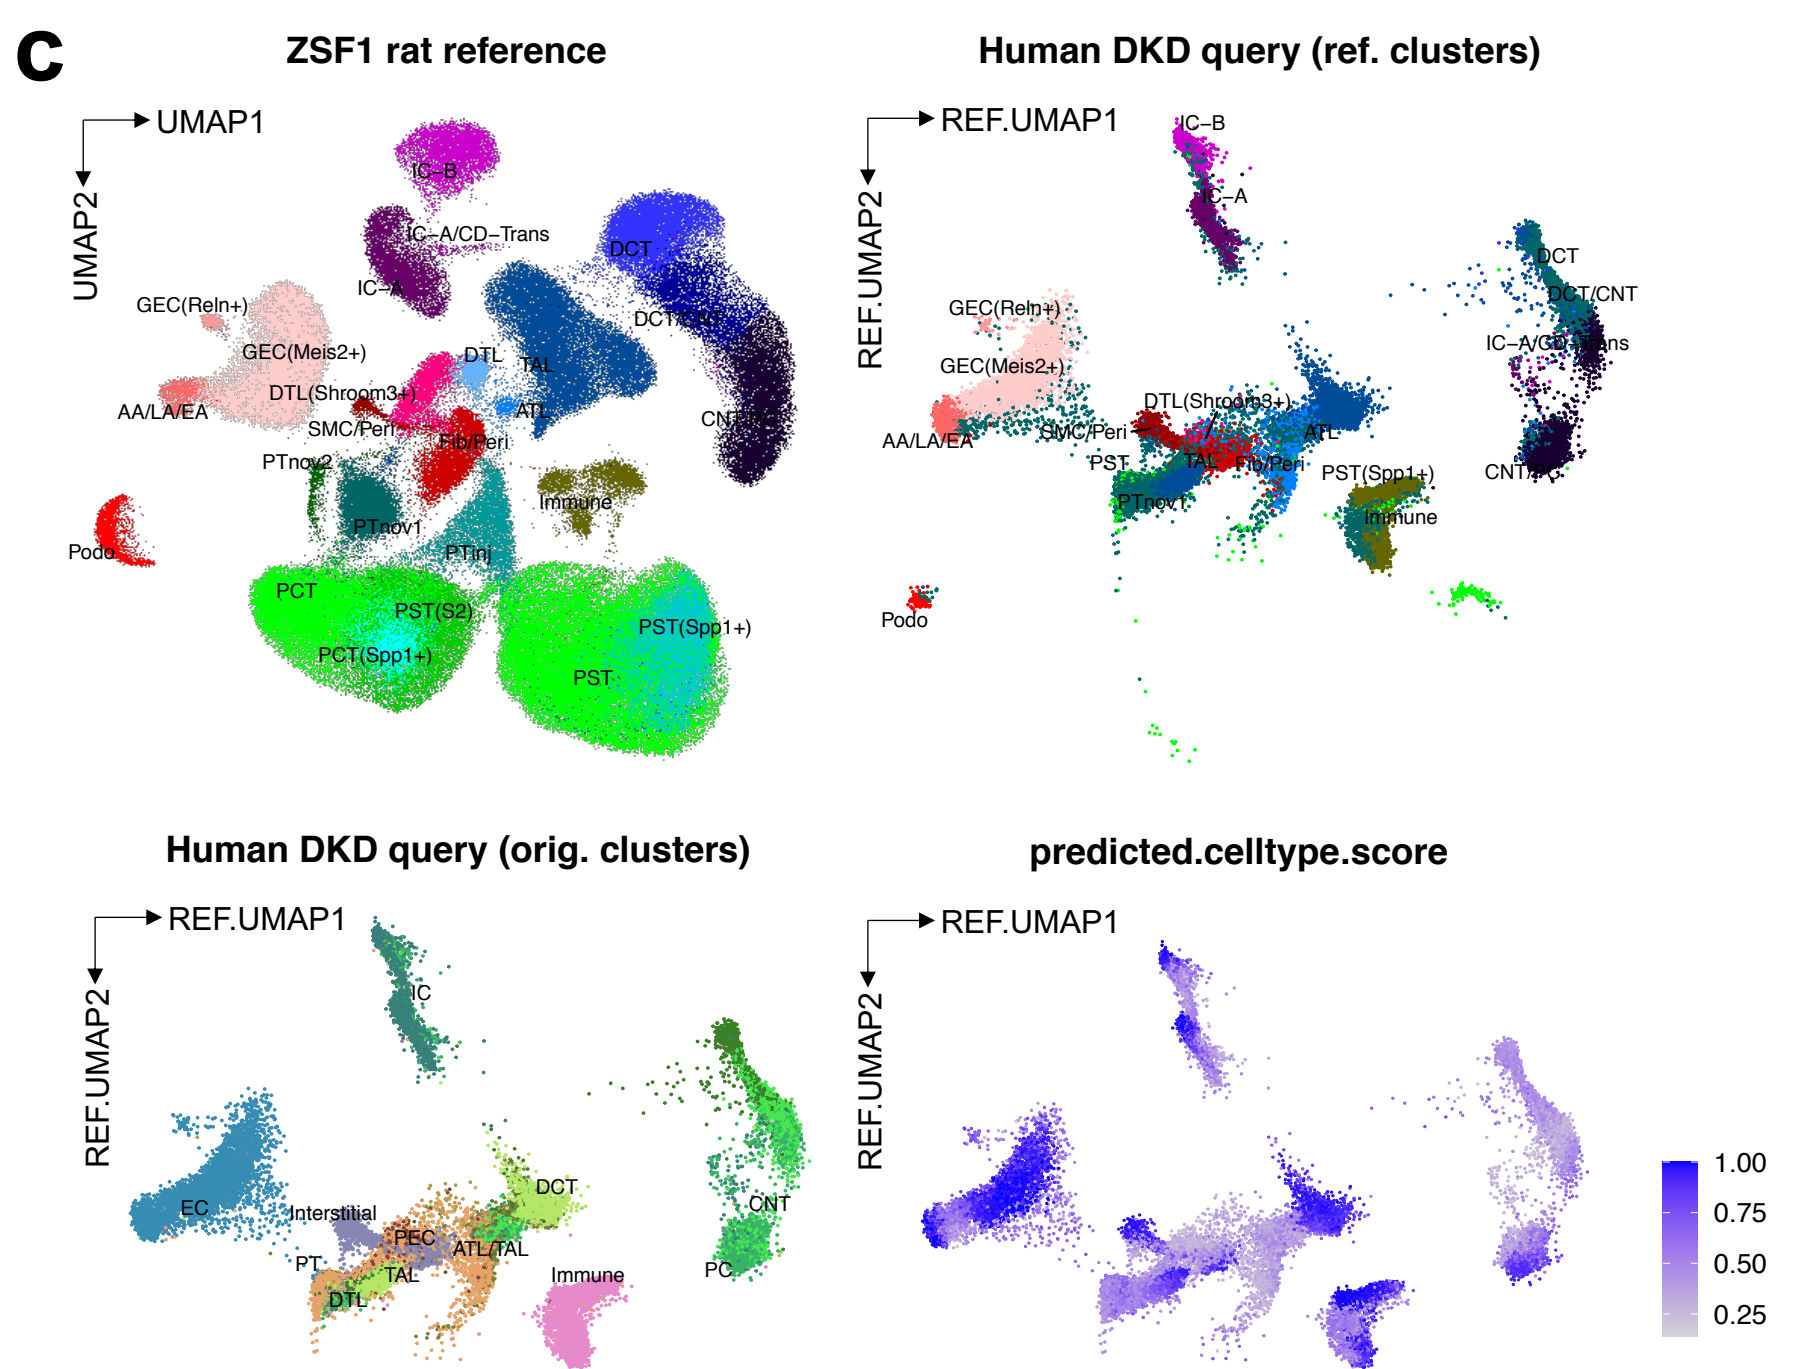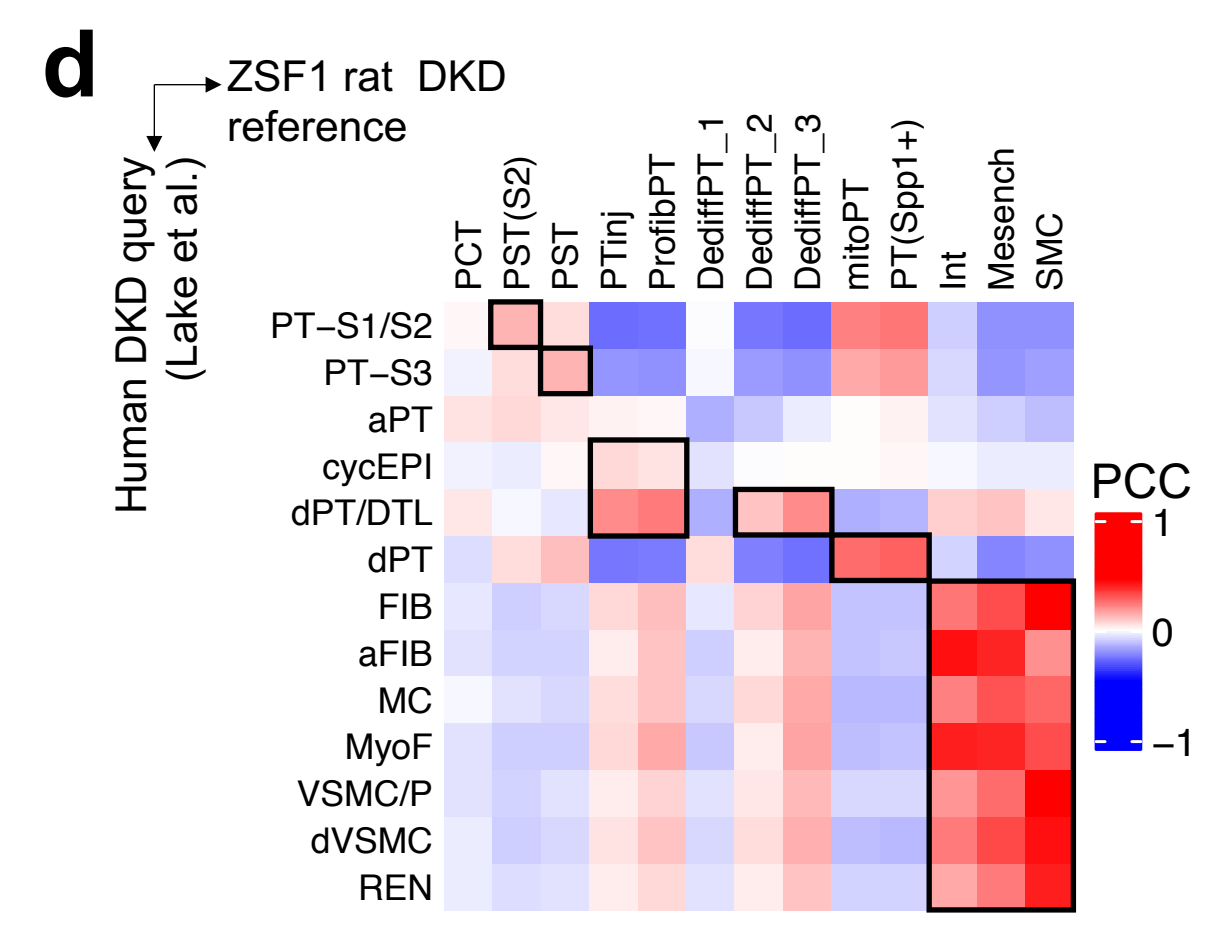

**Figure S5. ZSF1 rat integration with human DKD. Related to Figure 2.**

- (a) UMAP representations of ZSF1 rat reference with low-level clustering (top left) and human DKD query dataset (Wilson et al.) projected onto ZSF1 rat reference dataset (other subpanels). Human DKD subpanels are annotated/colored by ZSF1 rat reference clustering (top right), by original clustering (bottom left), and by predicted cell type score (bottom right).
- (b) Pearson correlation coefficient (PCC) matrix of average cell type gene expression between ZSF1 rats (Lean and Obese samples only) and a corresponding human snRNA-seq dataset from the Kidney Precision Medicine Project (KPMP, Lake et al.) with Control and DKD kidney samples; ATL, ascending thin limb; CNT, connecting tubule; DCT, distal convoluted tubule; DTL, descending thin limb; Endo/EC, endothelial cell; IC, collecting duct intercalated cell; LEUK, leukocyte; LOH, loop of Henle; MES, mesangial cells; PC, collecting duct principal cell; PEC, parietal epithelial cell; Podo/POD, podocytes; Prox tub/PT, proximal tubule; TAL, thick ascending limb.
- (c) Similar UMAP representations as in (a), but with dataset from Kidney Precision Medicine Project (KPMP, Lake et al.).
- (d) Similar correlation analysis as in (b), but with PT and stromal cell subclustering. aFIB, “adaptive” fibroblast; aPT, “adaptive epithelial state” proximal tubule; cycEPI, cycling epithelial cells; dPT, “degenerative” proximal tubule; DTL, descending thin limb; dVSCM, “degenerative” vascular smooth muscle cell; FIB, fibroblast; Int, interstitial cell; MC, mesangial cell; Mesench, mesenchymal cell; mitoPT, high mitochondrial gene PT; MyoF, myofibroblast; PCT, proximal convoluted tubule; PST, proximal straight tubule; PT, proximal tubule; PTinj, injured PT; ProfibPT, profibrotic PT; DediffPT, dedifferentiated PT; PT(Spp1+), Spp1<sup>+</sup> PT; REN, Renin-positive juxtaglomerular granular cell; SMC, smooth muscle cell; VSCM/P, vascular smooth muscle cell/pericyte.

**a**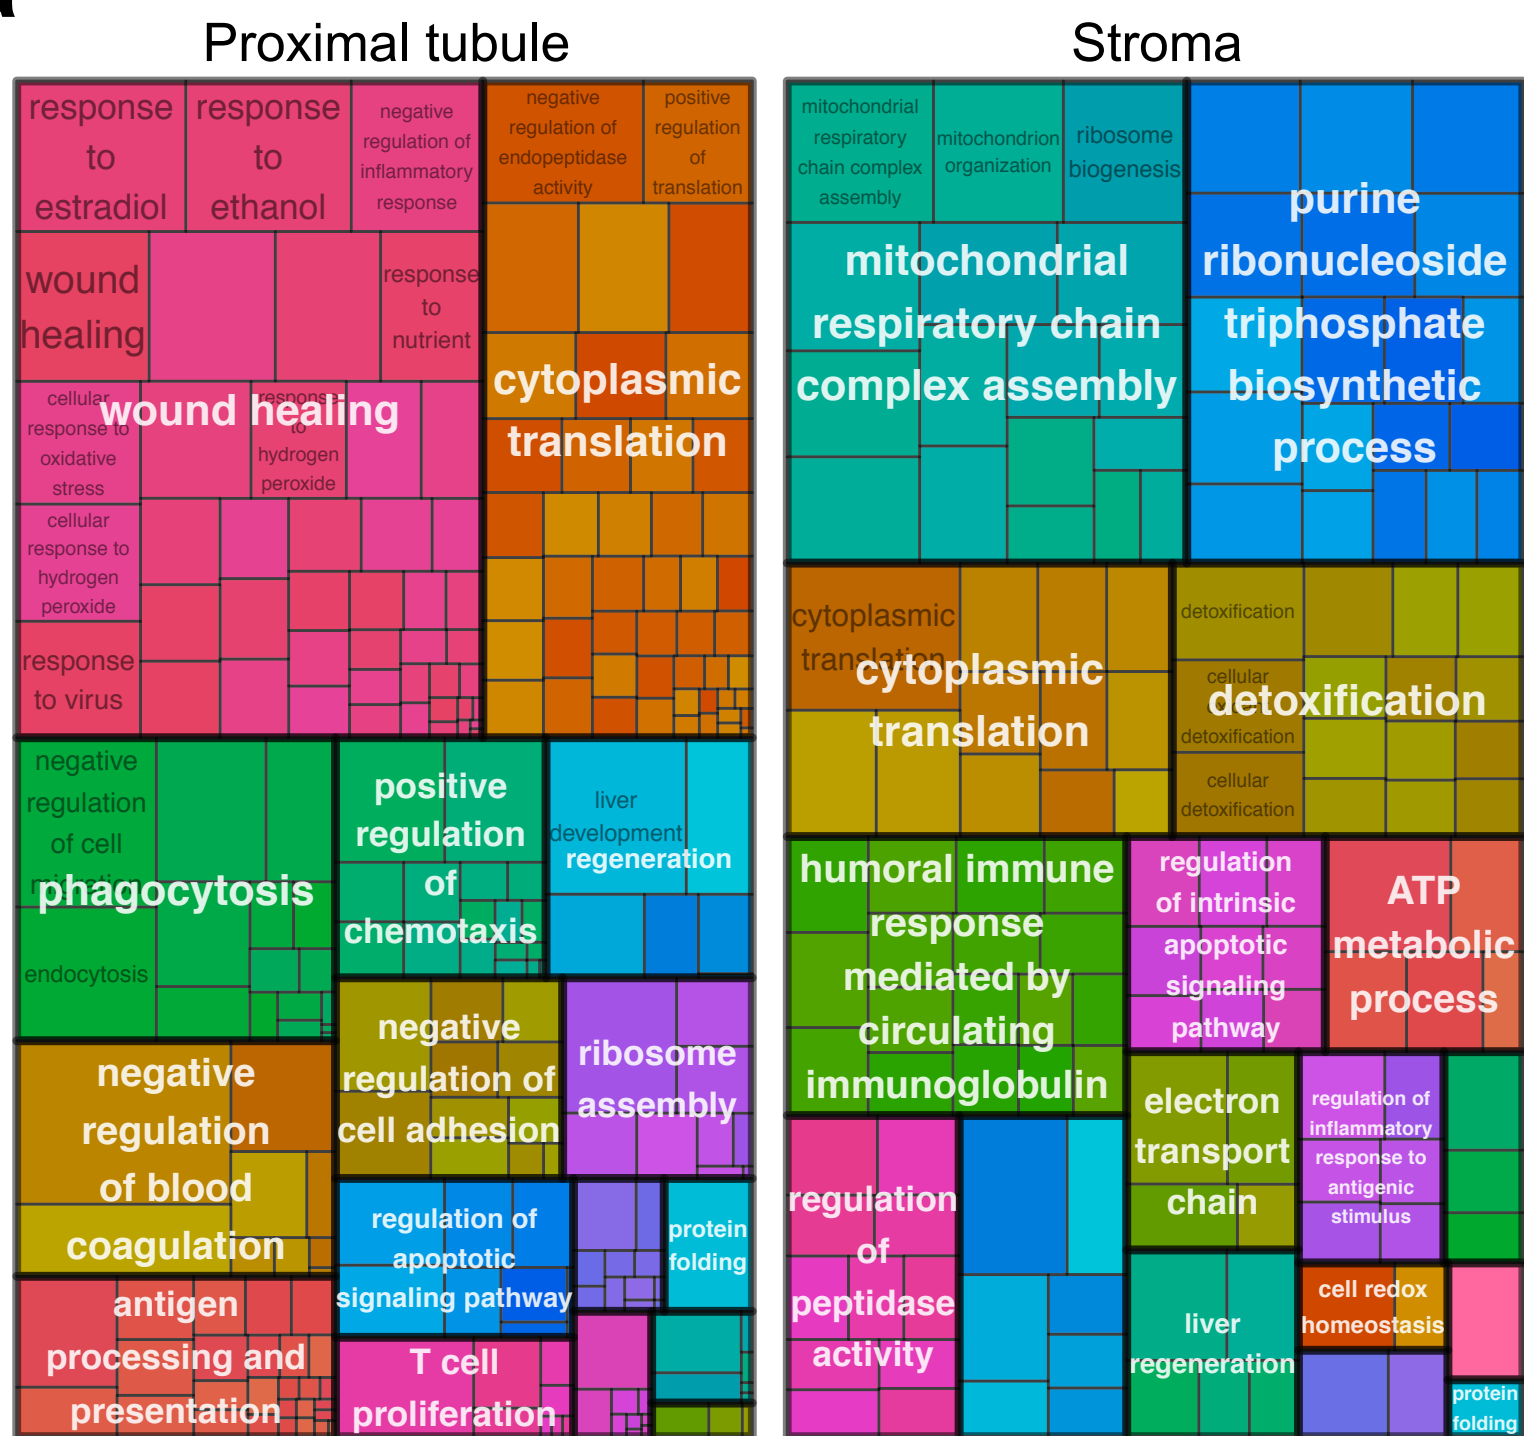**d**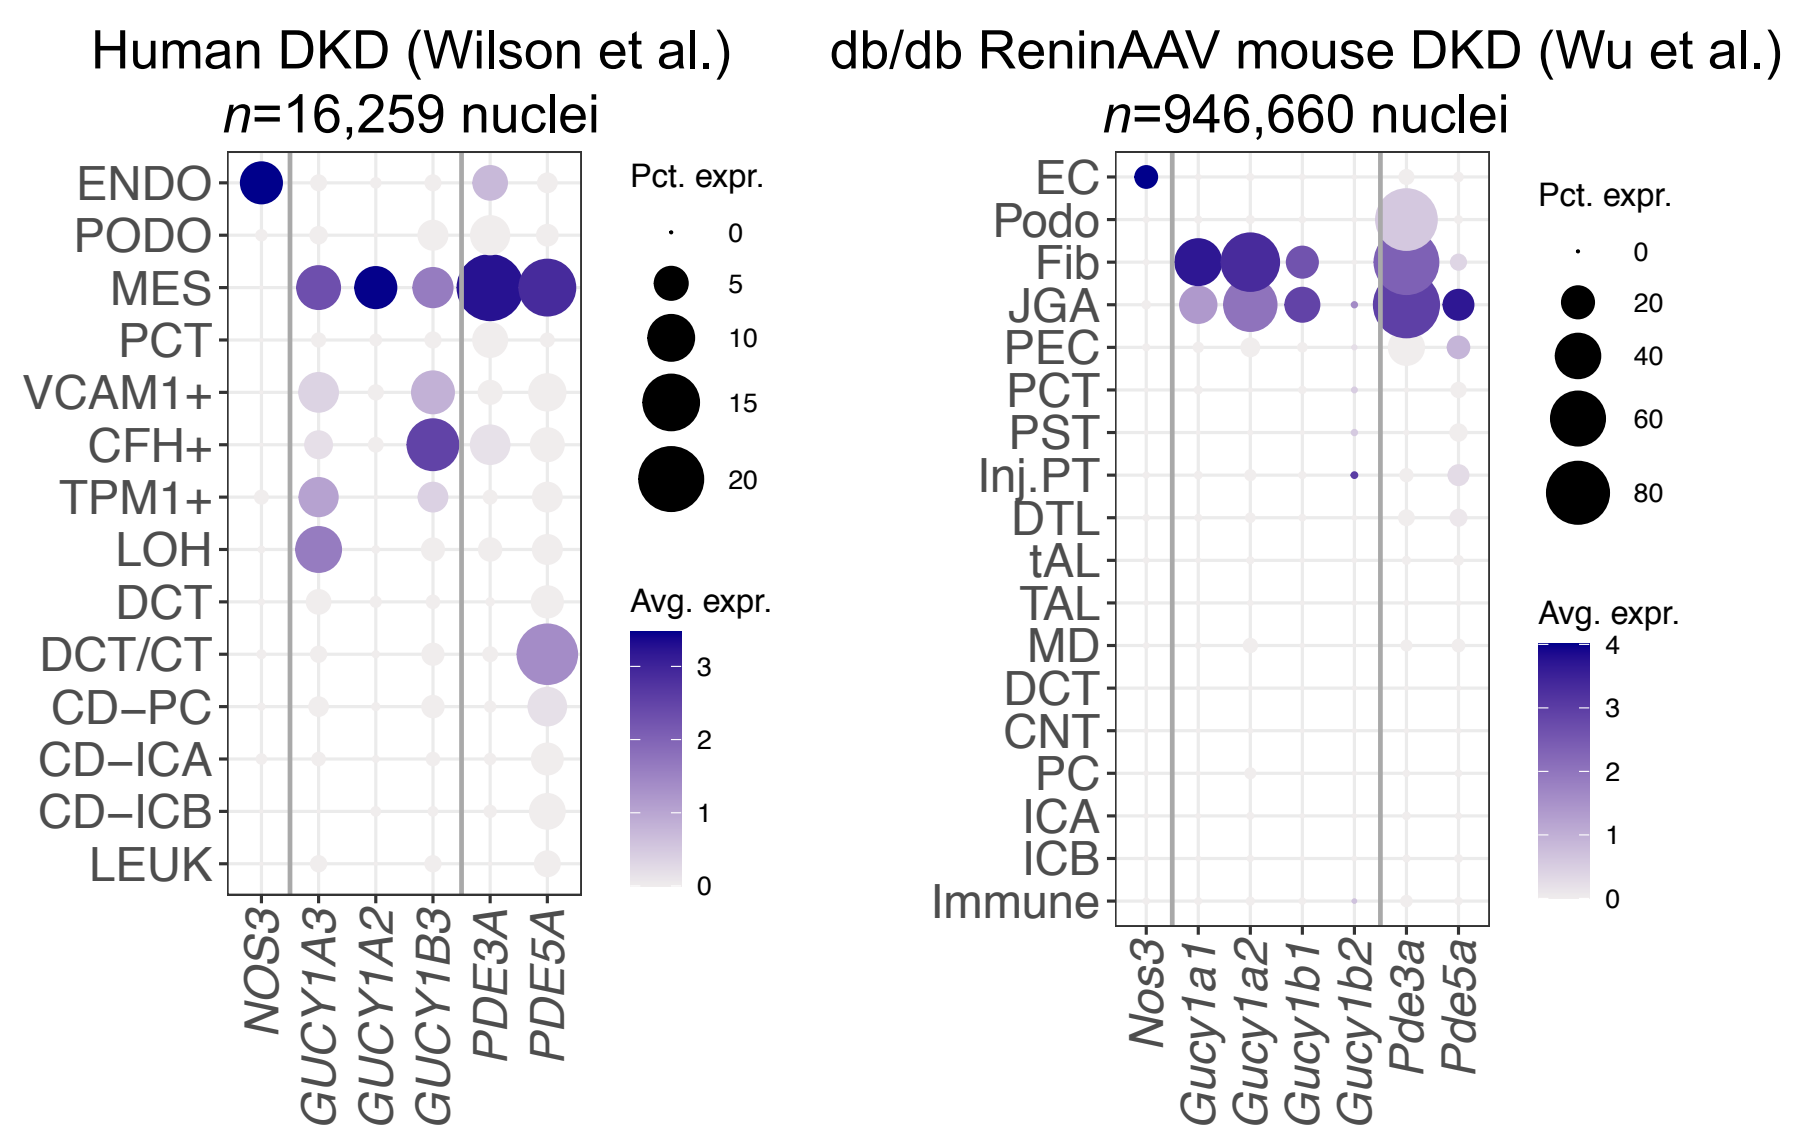**b**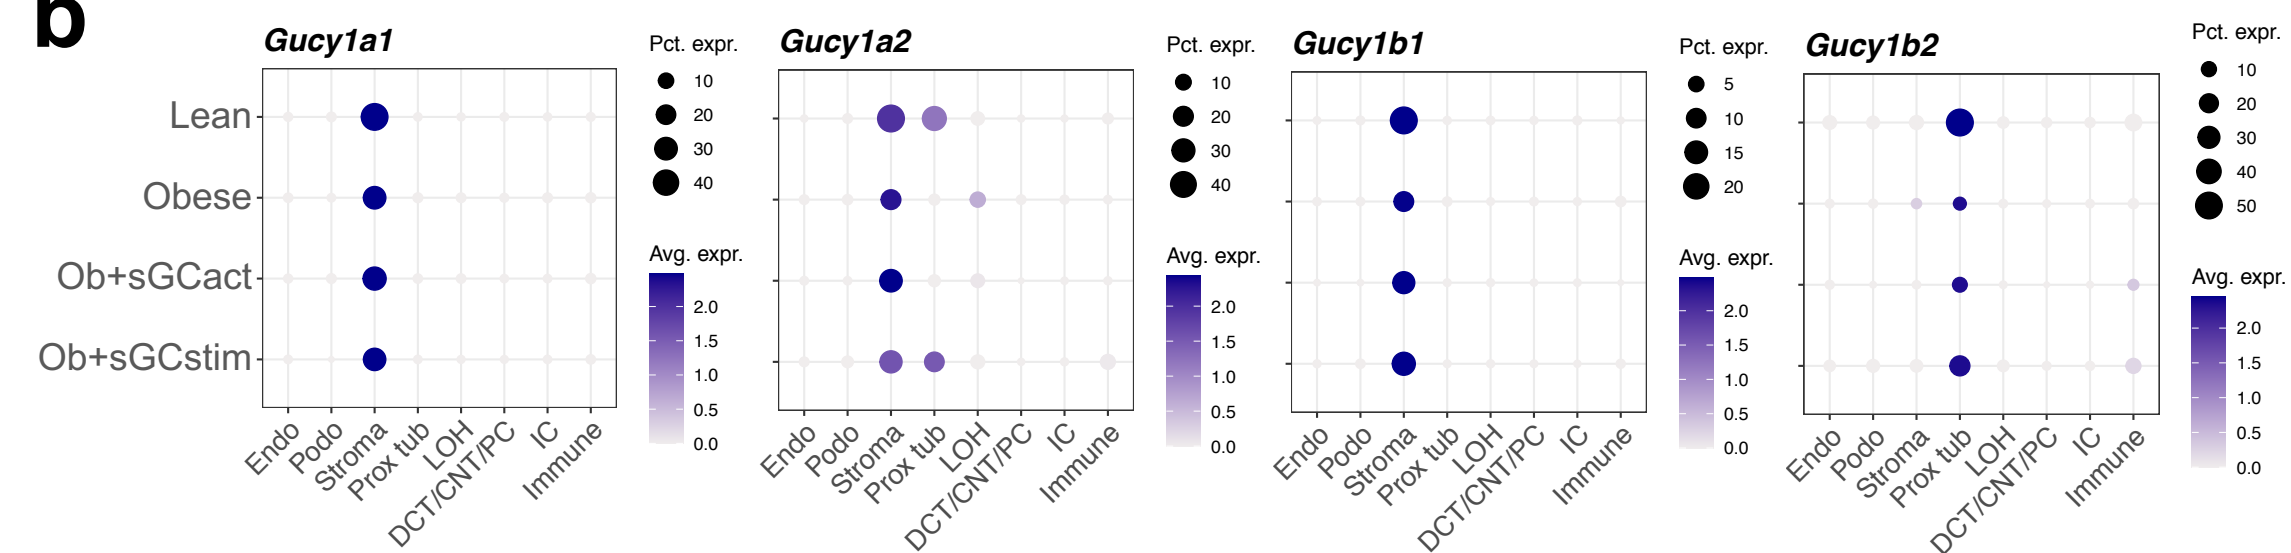**c**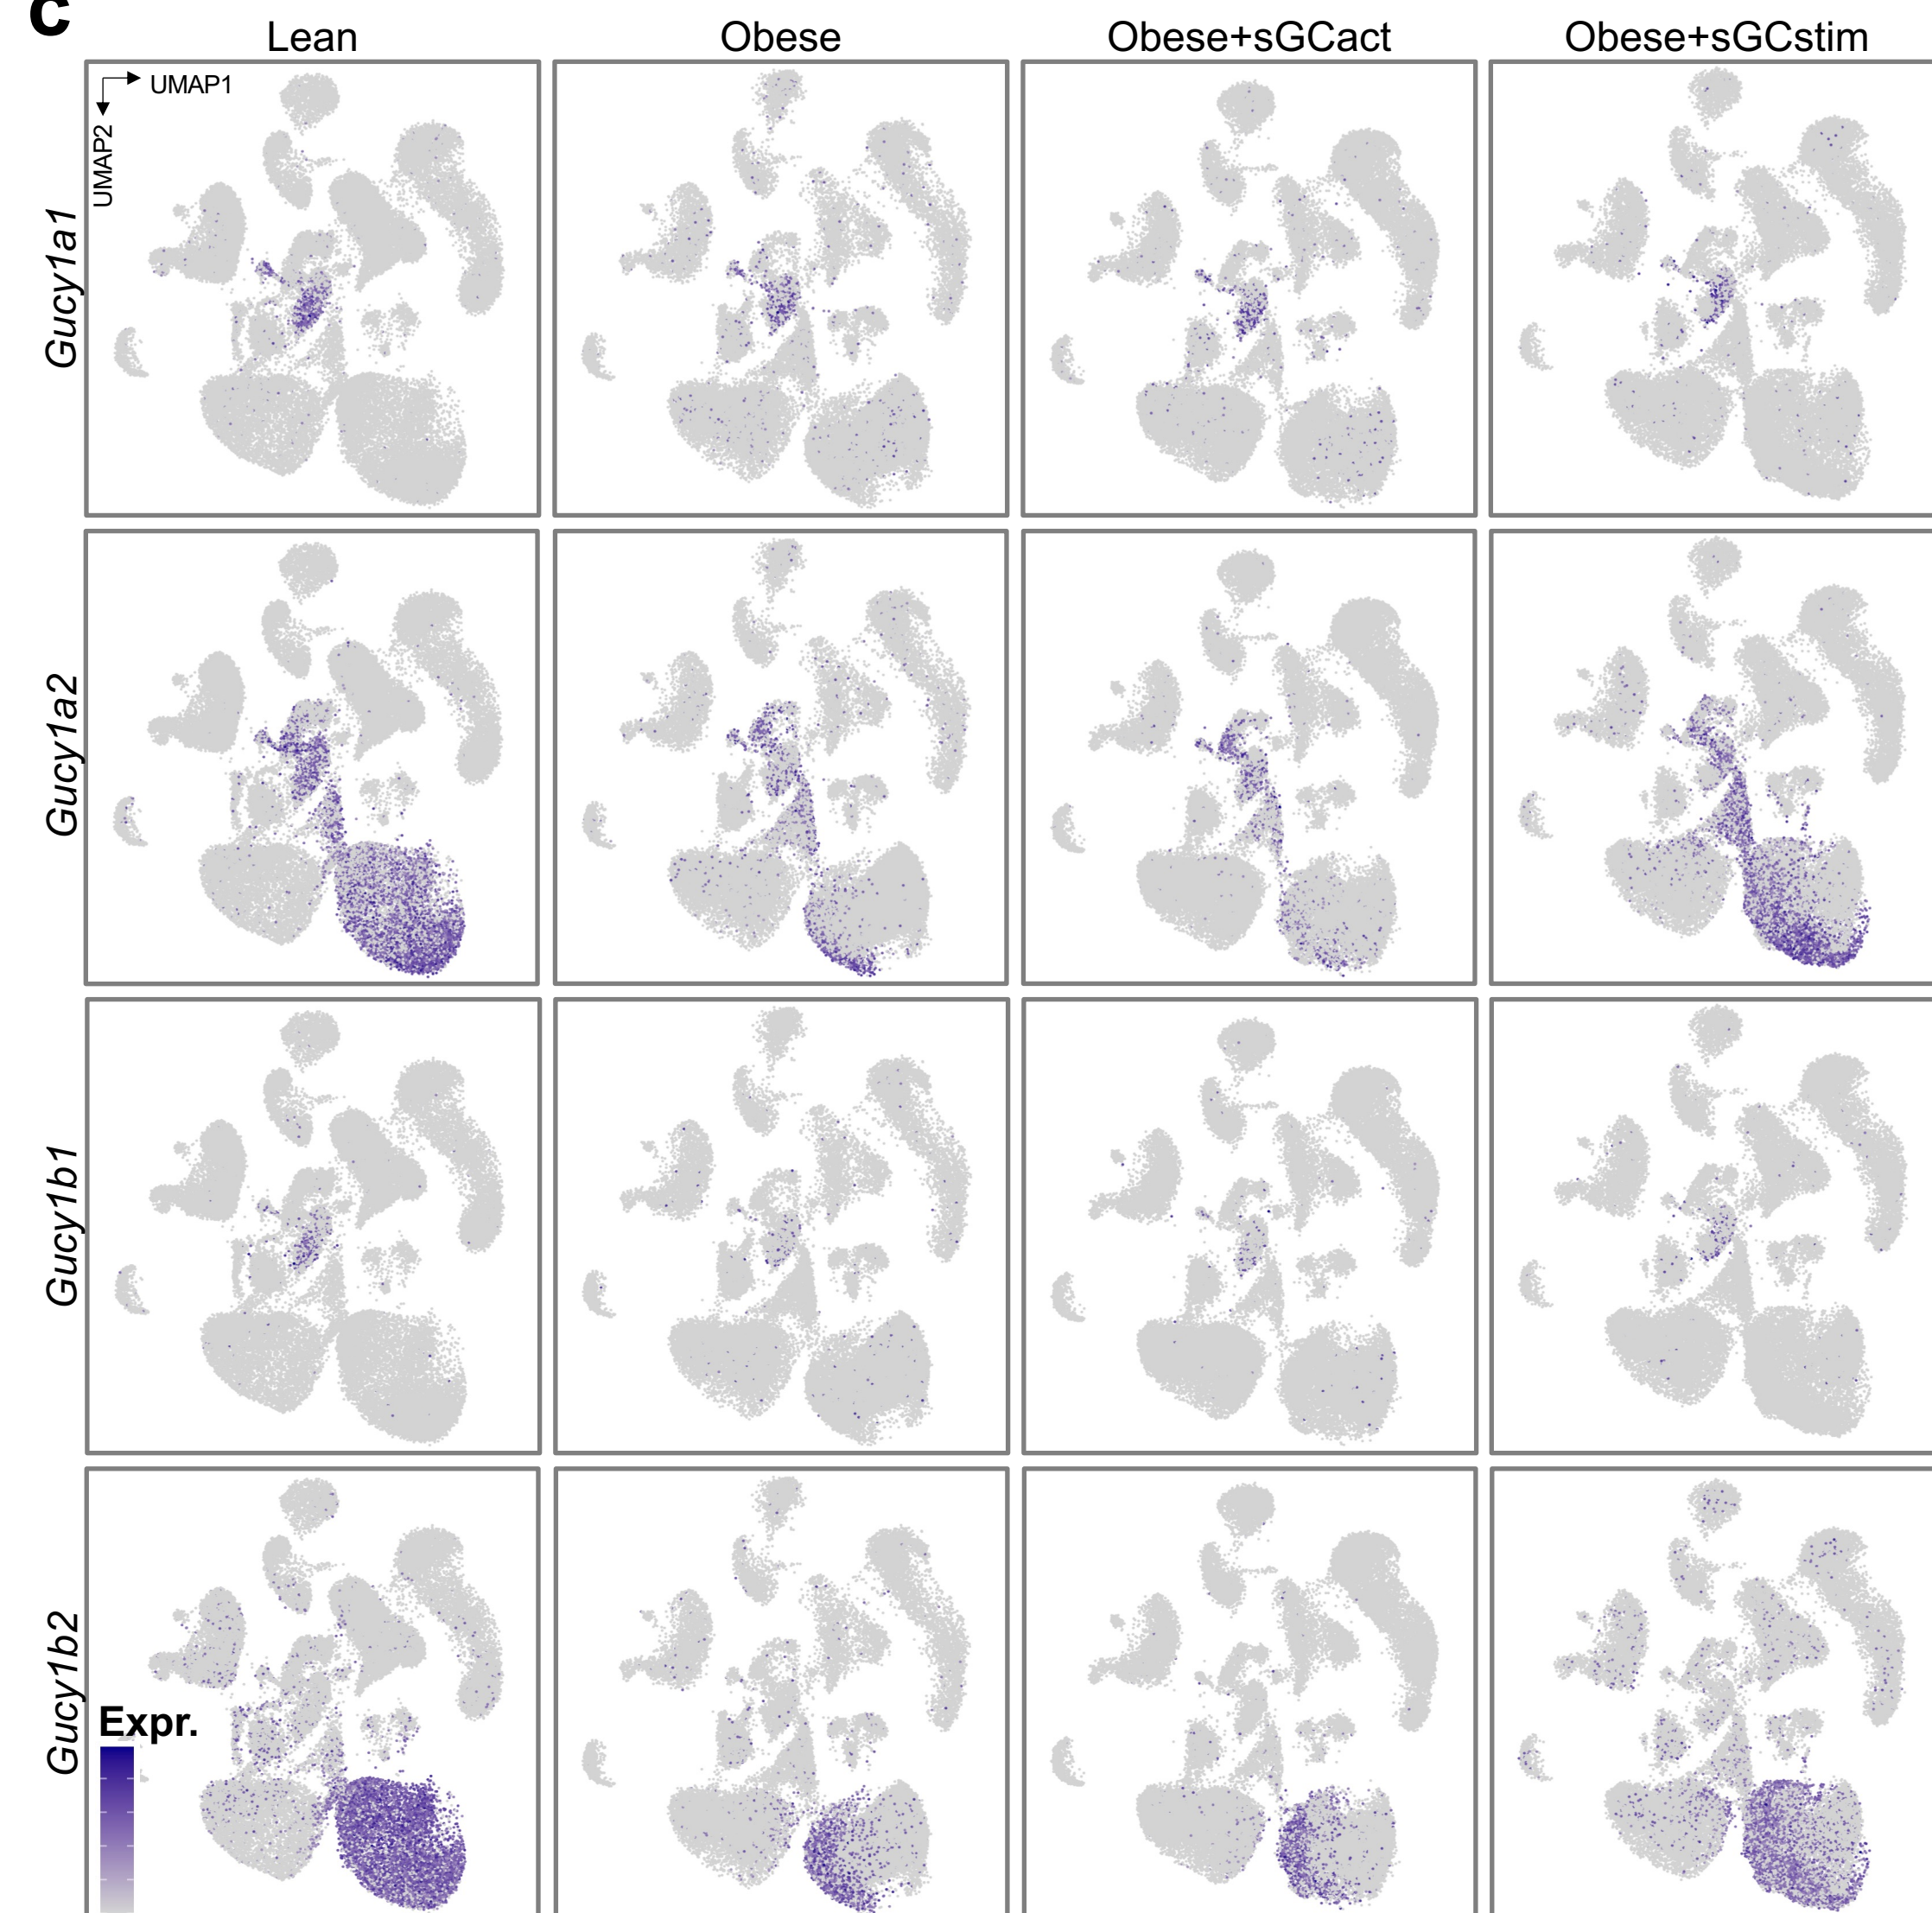

**Figure S6. GO term analysis of tensor decomposition factor 1-loading genes and PT and stromal cell type specificity of sGC gene expression. Related to Figure 2.**

- (a) Gene ontology (GO) terms of factor 1-loading genes in proximal tubule and stromal cells.
- (b) Expression dot plots for sGC genes, stratified by experimental group (rows) and high-level clustering (columns); dot size denotes percentage of cells expressing the marker. Color scale represents average gene expression values.
- (c) Feature plots corresponding to **(b)**.
- (d) Expression dot plots for NO/sGC/cGAMP pathway genes in human DKD (left) and murine DKD (right) datasets, corresponding to **Fig. 2g**; dot size denotes percentage of cells expressing the marker. Color scale represents average gene expression values.

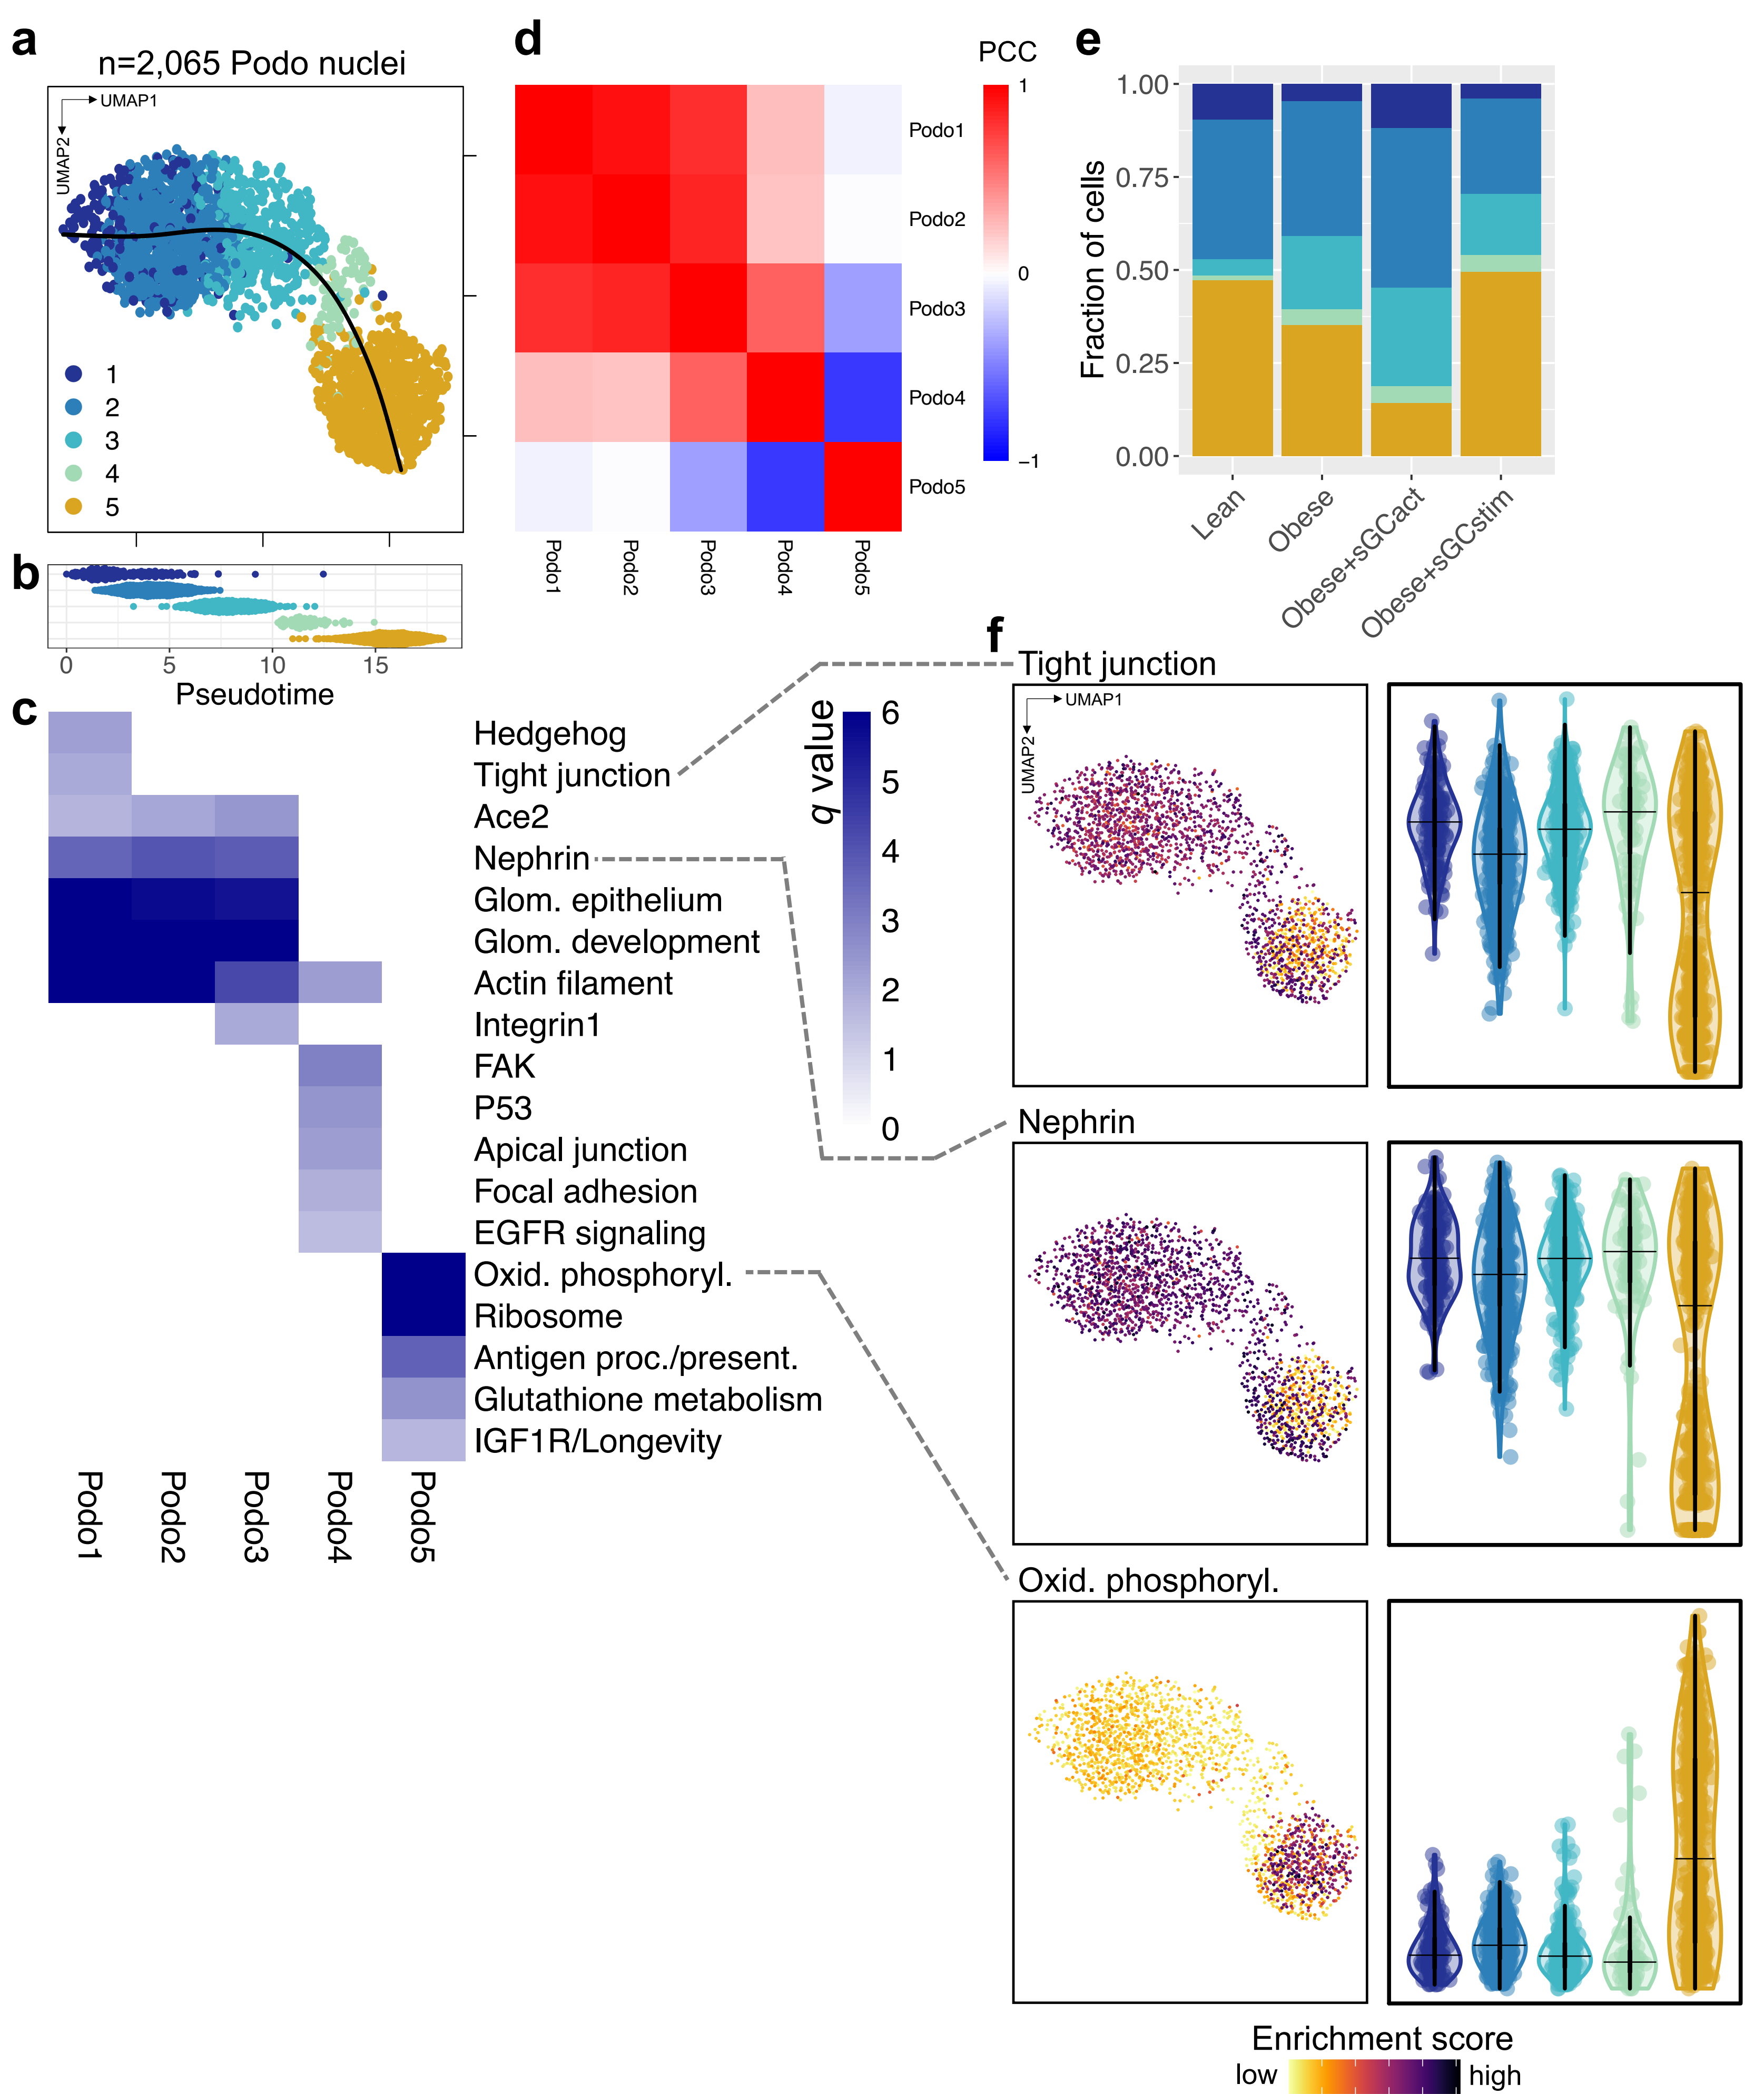



**Figure S7. Podocyte subclustering. Related to Figure 2.**

- (a) Integrated UMAP of 2,065 high-quality podocyte nuclei from 12 rat kidney samples. Black line indicates Slingshot-inferred trajectory from clusters 1 through 5.
- (b) Pseudotime values across podocyte clusters 1 through 5. Colors correspond to **(a)**.
- (c) Heatmaps shows enrichment of top pseudotime-specific GO biological processes and KEGG pathways.
- (d) Pearson correlation coefficient (PCC) matrix of average cell type gene expression between podocyte clusters 1 through 5.
- (e) Cell fractions of podocyte clusters stratified by experimental group. Colors correspond to **(a)**.
- (f) Scoring of gene sets corresponding to representative pathways from **(c)**. Left panels show pathway enrichment along the podocyte trajectory. Right panels show gene set scores by podocyte cluster. Colors correspond to **(a)**.

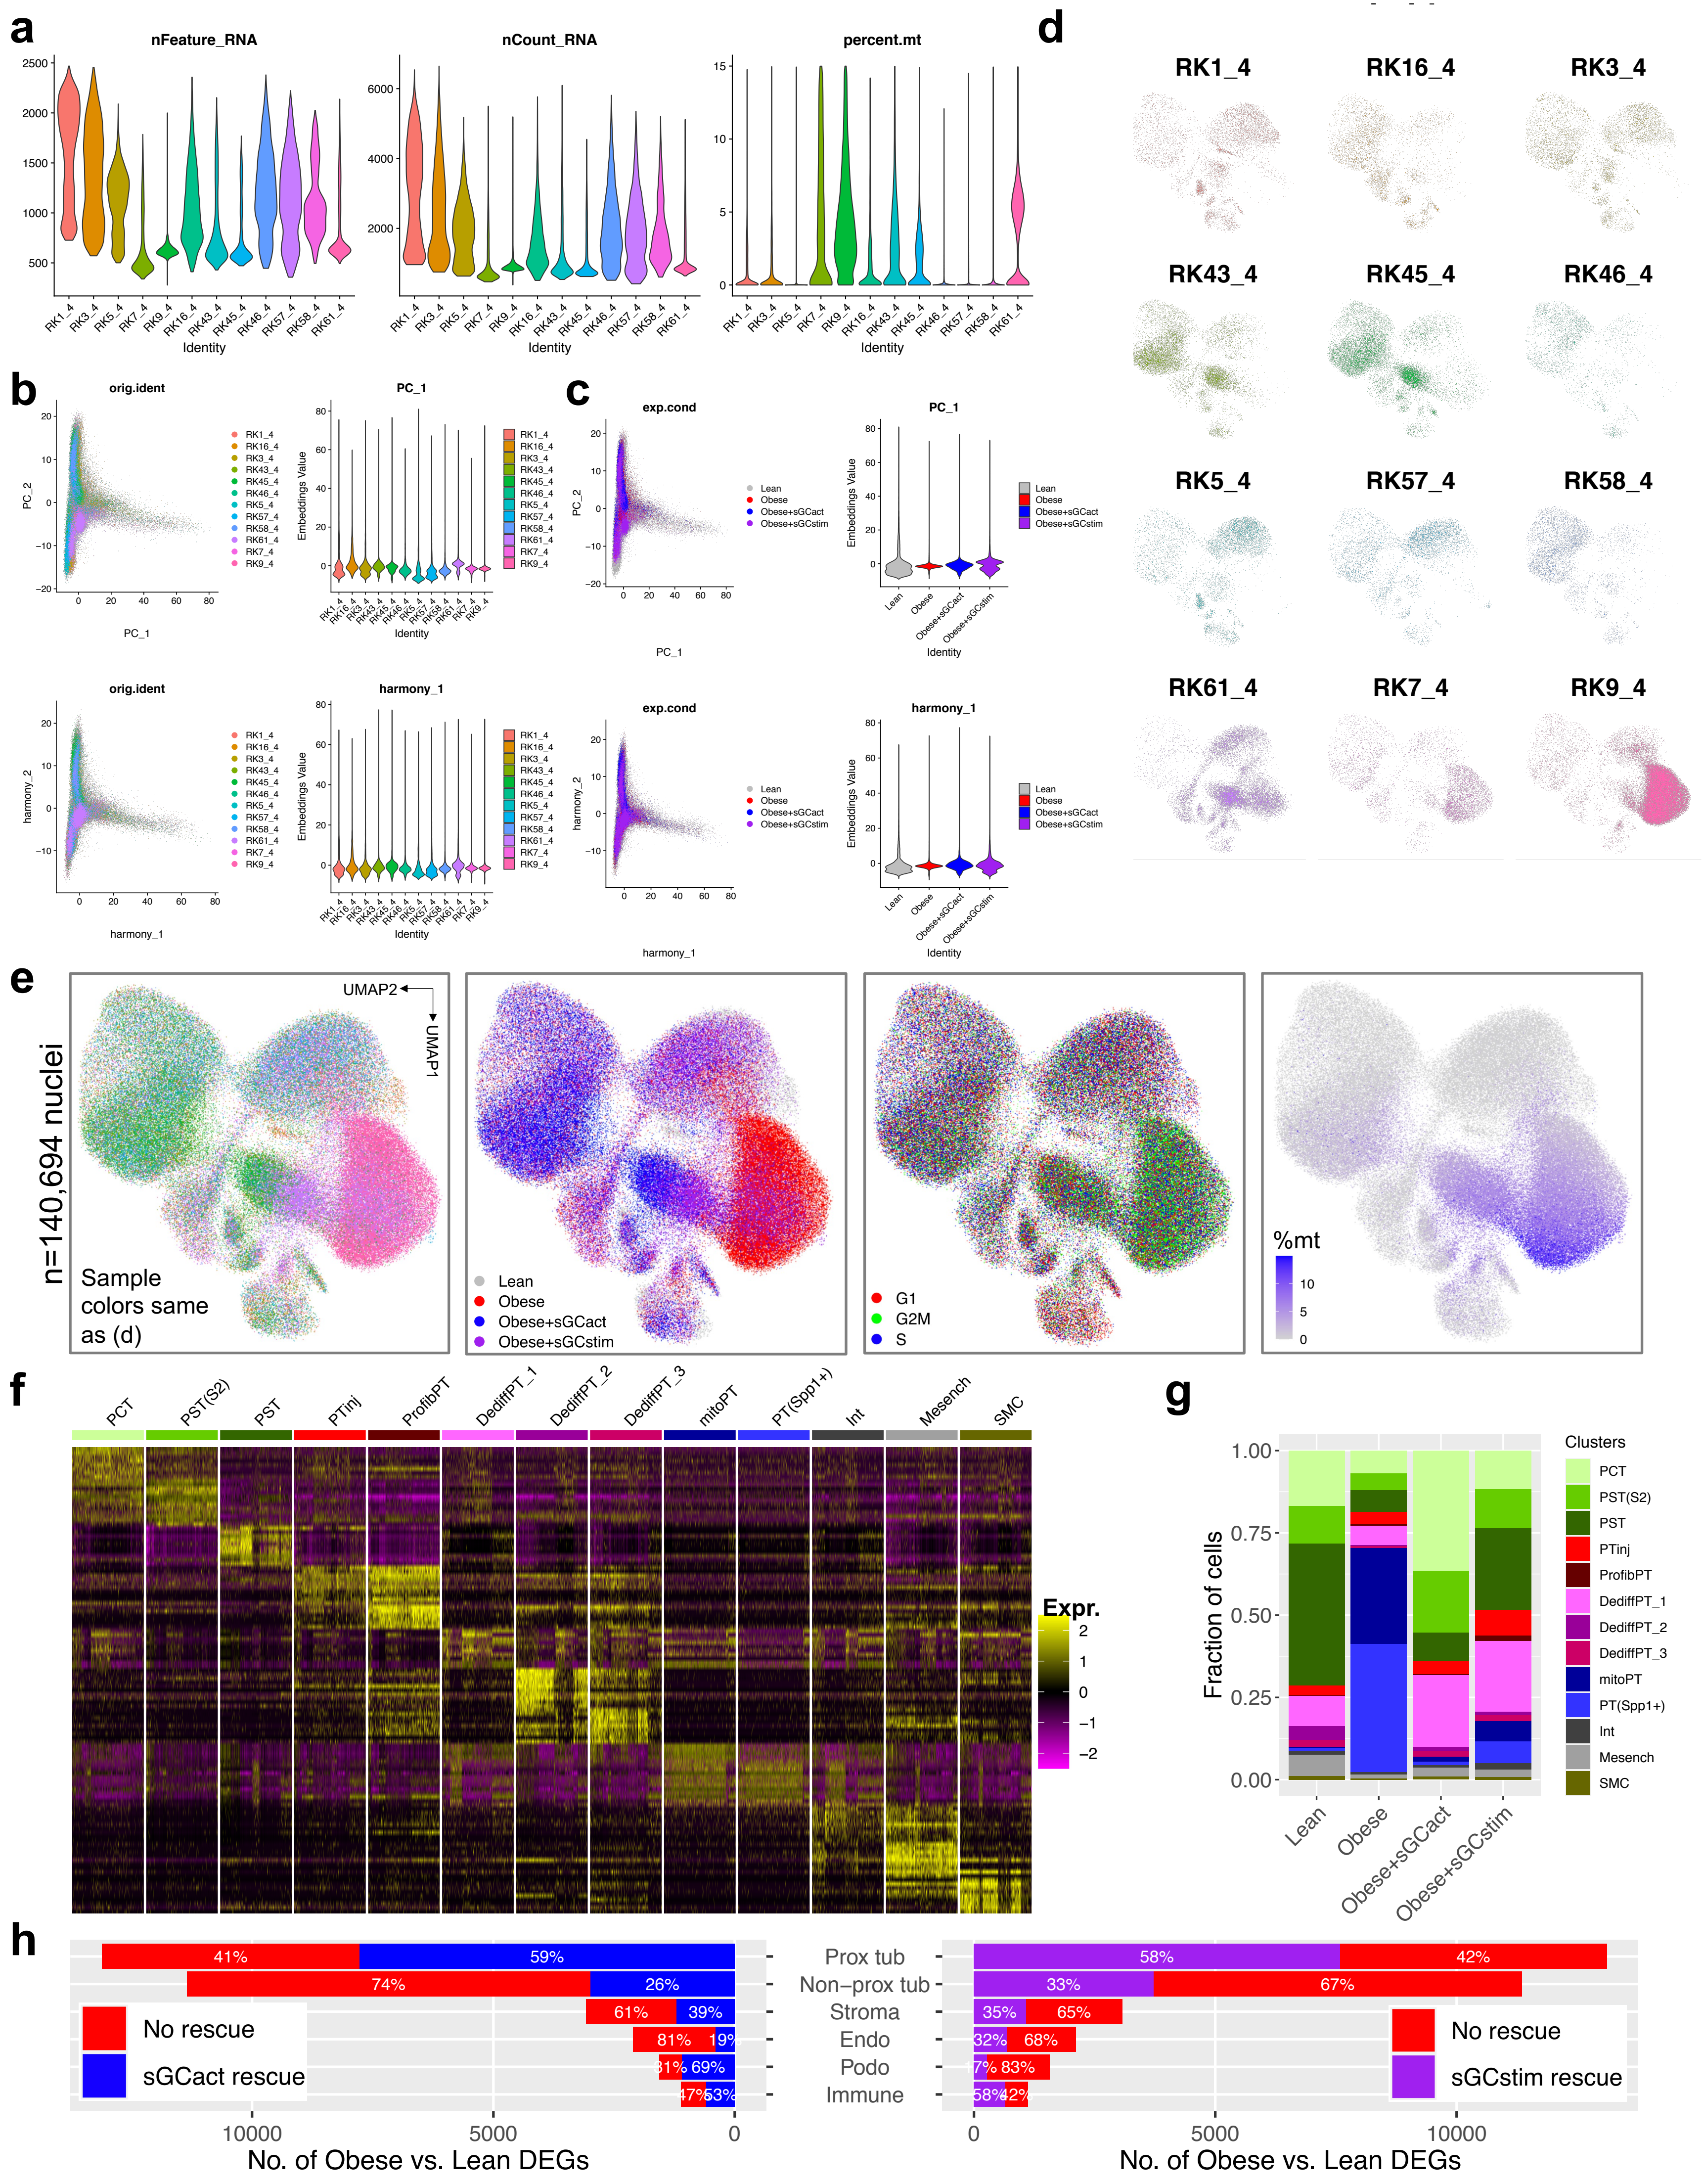

**Figure S8. PT and stromal cell subclustering. Related to Figure 3.**

- (a) Violin plots showing number of informative genes (nFeature\_RNA), unique molecular identifiers (nCount\_RNA), and percentage of mitochondrial genes (percent.mt) per single cell.
- (b) Principal component (PC) representation (left) and violin plots of corresponding embeddings values (right) before (top) and after batch correction (bottom) using Harmony, stratified by individual sample.
- (c) Same as in (b), stratified by experimental group.
- (d) Integrated UMAP corresponding to **Fig. 3a**, stratified by sample.
- (e) Integrated UMAP corresponding to **Fig. 3a**, annotated by sample, experimental group, cell cycle phase, and mitochondrial percentage (%mt), respectively.
- (f) Heatmap of top 10 differentially expressed genes for subclusters. PCT, proximal convoluted tubule; PST(S2), proximal straight tubule (segment 2); PST, proximal straight tubule; PTinj, injured PT; ProfibPT, profibrotic PT; DediffPT, dedifferentiated PT; mitoPT, high mitochondrial gene PT; PT(Spp1+), Spp1<sup>+</sup> PT; Int, interstitial cell; Mesench, mesenchymal cell; SMC, smooth muscle cell.
- (g) Cell fractions of PT and stromal cell subclusters stratified by experimental group. Colors correspond to (f).
- (h) Bar graphs representing the number of genes differentially expressed (DEG) between Obese and Lean samples in coarse-grained, high-level cell types. Percentages indicate absent or present rescue effect (normalization) for DEG comparison between sGC modulator-treated rats (sGCstim, sGCact) and vehicle-treated rats.

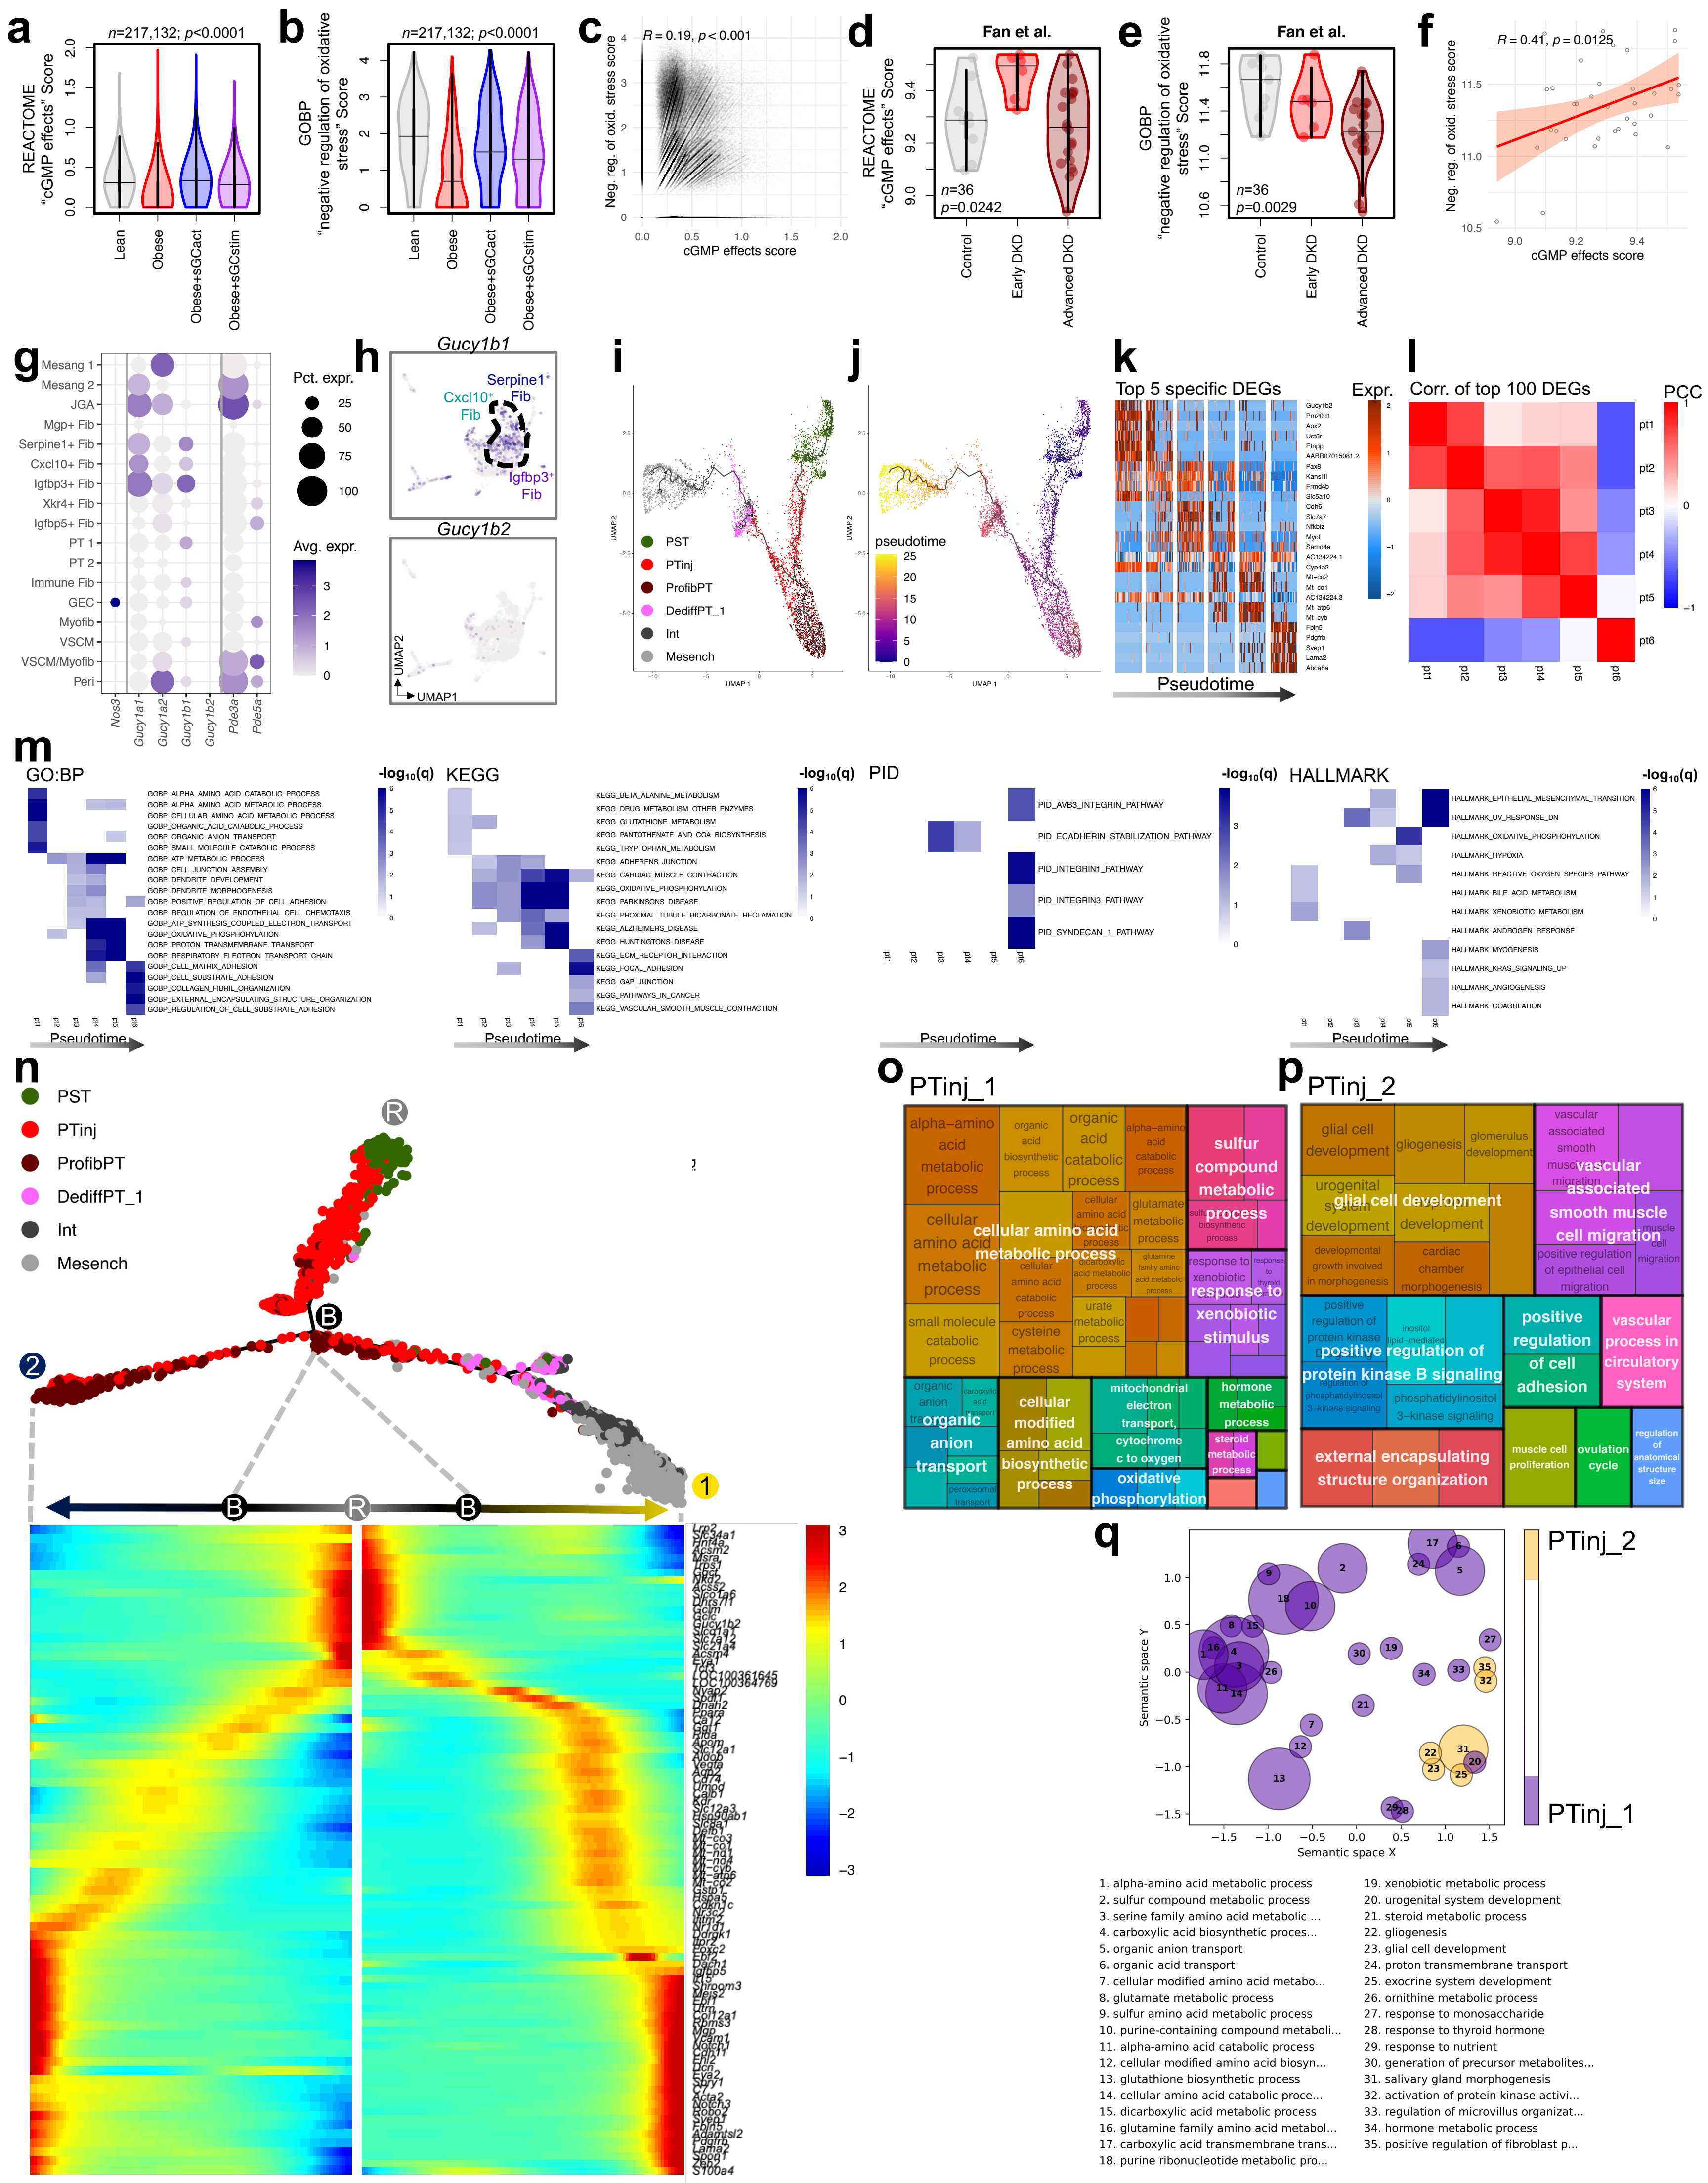

**Figure S9. Trajectory analysis highlights dynamic changes of PT cells towards profibrotic and mesenchymal cell states. Related to Figures 3 and 4.**

- (a-b) REACTOME “cGMP effects” **(a)** and GOBP “negative regulation of oxidative stress” scores **(b)** in the integrated ZSF1 rat DKD dataset by experimental groups; p values are given for one-way ANOVA (Tukey-corrected).
- (c) Corresponding scatterplot for correlation of GOBP “negative regulation of oxidative stress” score (y axis) and REACTOME “cGMP effects” score (x axis); p value is given for linear regression.
- (d-e) REACTOME “cGMP effects” **(d)** and GOBP “negative regulation of oxidative stress” scores **(e)** in a human kidney bulk RNA-seq dataset by DKD severity; p values are given for one-way ANOVA (Tukey-corrected).
- (f) Corresponding scatterplot for correlation of GOBP “negative regulation of oxidative stress” score (y axis) and REACTOME “cGMP effects” score (x axis); p value is given for linear regression; error bands represent 95% confidence interval.
- (g) Expression dot plot for NO/sGC/cGAMP pathway genes in stroma subclusters (rows), corresponding to **Fig. 3e**. Dot size denotes percentage of cells expressing the marker. Color scale represents average gene expression values. Mesang, mesangial cell; JGA, juxtaglomerular apparatus cell; Fib, fibroblast; PT, proximal tubule; GEC, glomerular endothelial cell; Myofib, myofibroblast; VSCM, vascular smooth muscle cell; Peri, pericyte.
- (h) Feature plots for *Gucy1b1* and *Gucy1b2* in UMAP space.
- (i-j) Monocle3-derived PT-Mesench trajectory, colored by cell clusters along the trajectory **(i)** and by pseudotime **(j)**, respectively. PST, proximal straight tubule; PTinj, injured PT; ProfibPT, profibrotic PT; DediffPT, dedifferentiated PT; Int, interstitial cell; Mesench, mesenchymal cell.
- (k) Expression heatmap of top 5 differentially expressed genes (DEGs) along Monocle3-derived pseudotime. Rows represent DEGs, columns represent individual PT cells in bins along pseudotime.
- (l) Pearson correlation coefficient (PCC) matrix of top 100 DEG expression between pseudotime bins along Monocle3-derived trajectory.
- (m) Corresponding enrichment of top pseudotime-specific GO biological processes and KEGG, Pathway Interaction Database (PID), and HALLMARK pathways, respectively.
- (n) Monocle2-derived PT-Mesench trajectory (top) and corresponding heatmap visualizing pseudotime-dependent gene expression along lineages 1 and 2, respectively. R denotes root node, B denotes branching point, 1 and 2 denote end points of lineages 1 and 2, respectively.
- (o-p) Gene ontology (GO) terms derived from top PTinj\_1 **(o)** and PTinj\_2-specific **(p)** DEGs, corresponding to **Fig. 3e**.
- (q) GO terms enriched in PTinj\_1 and PTinj\_2, respectively, in latent semantic space.

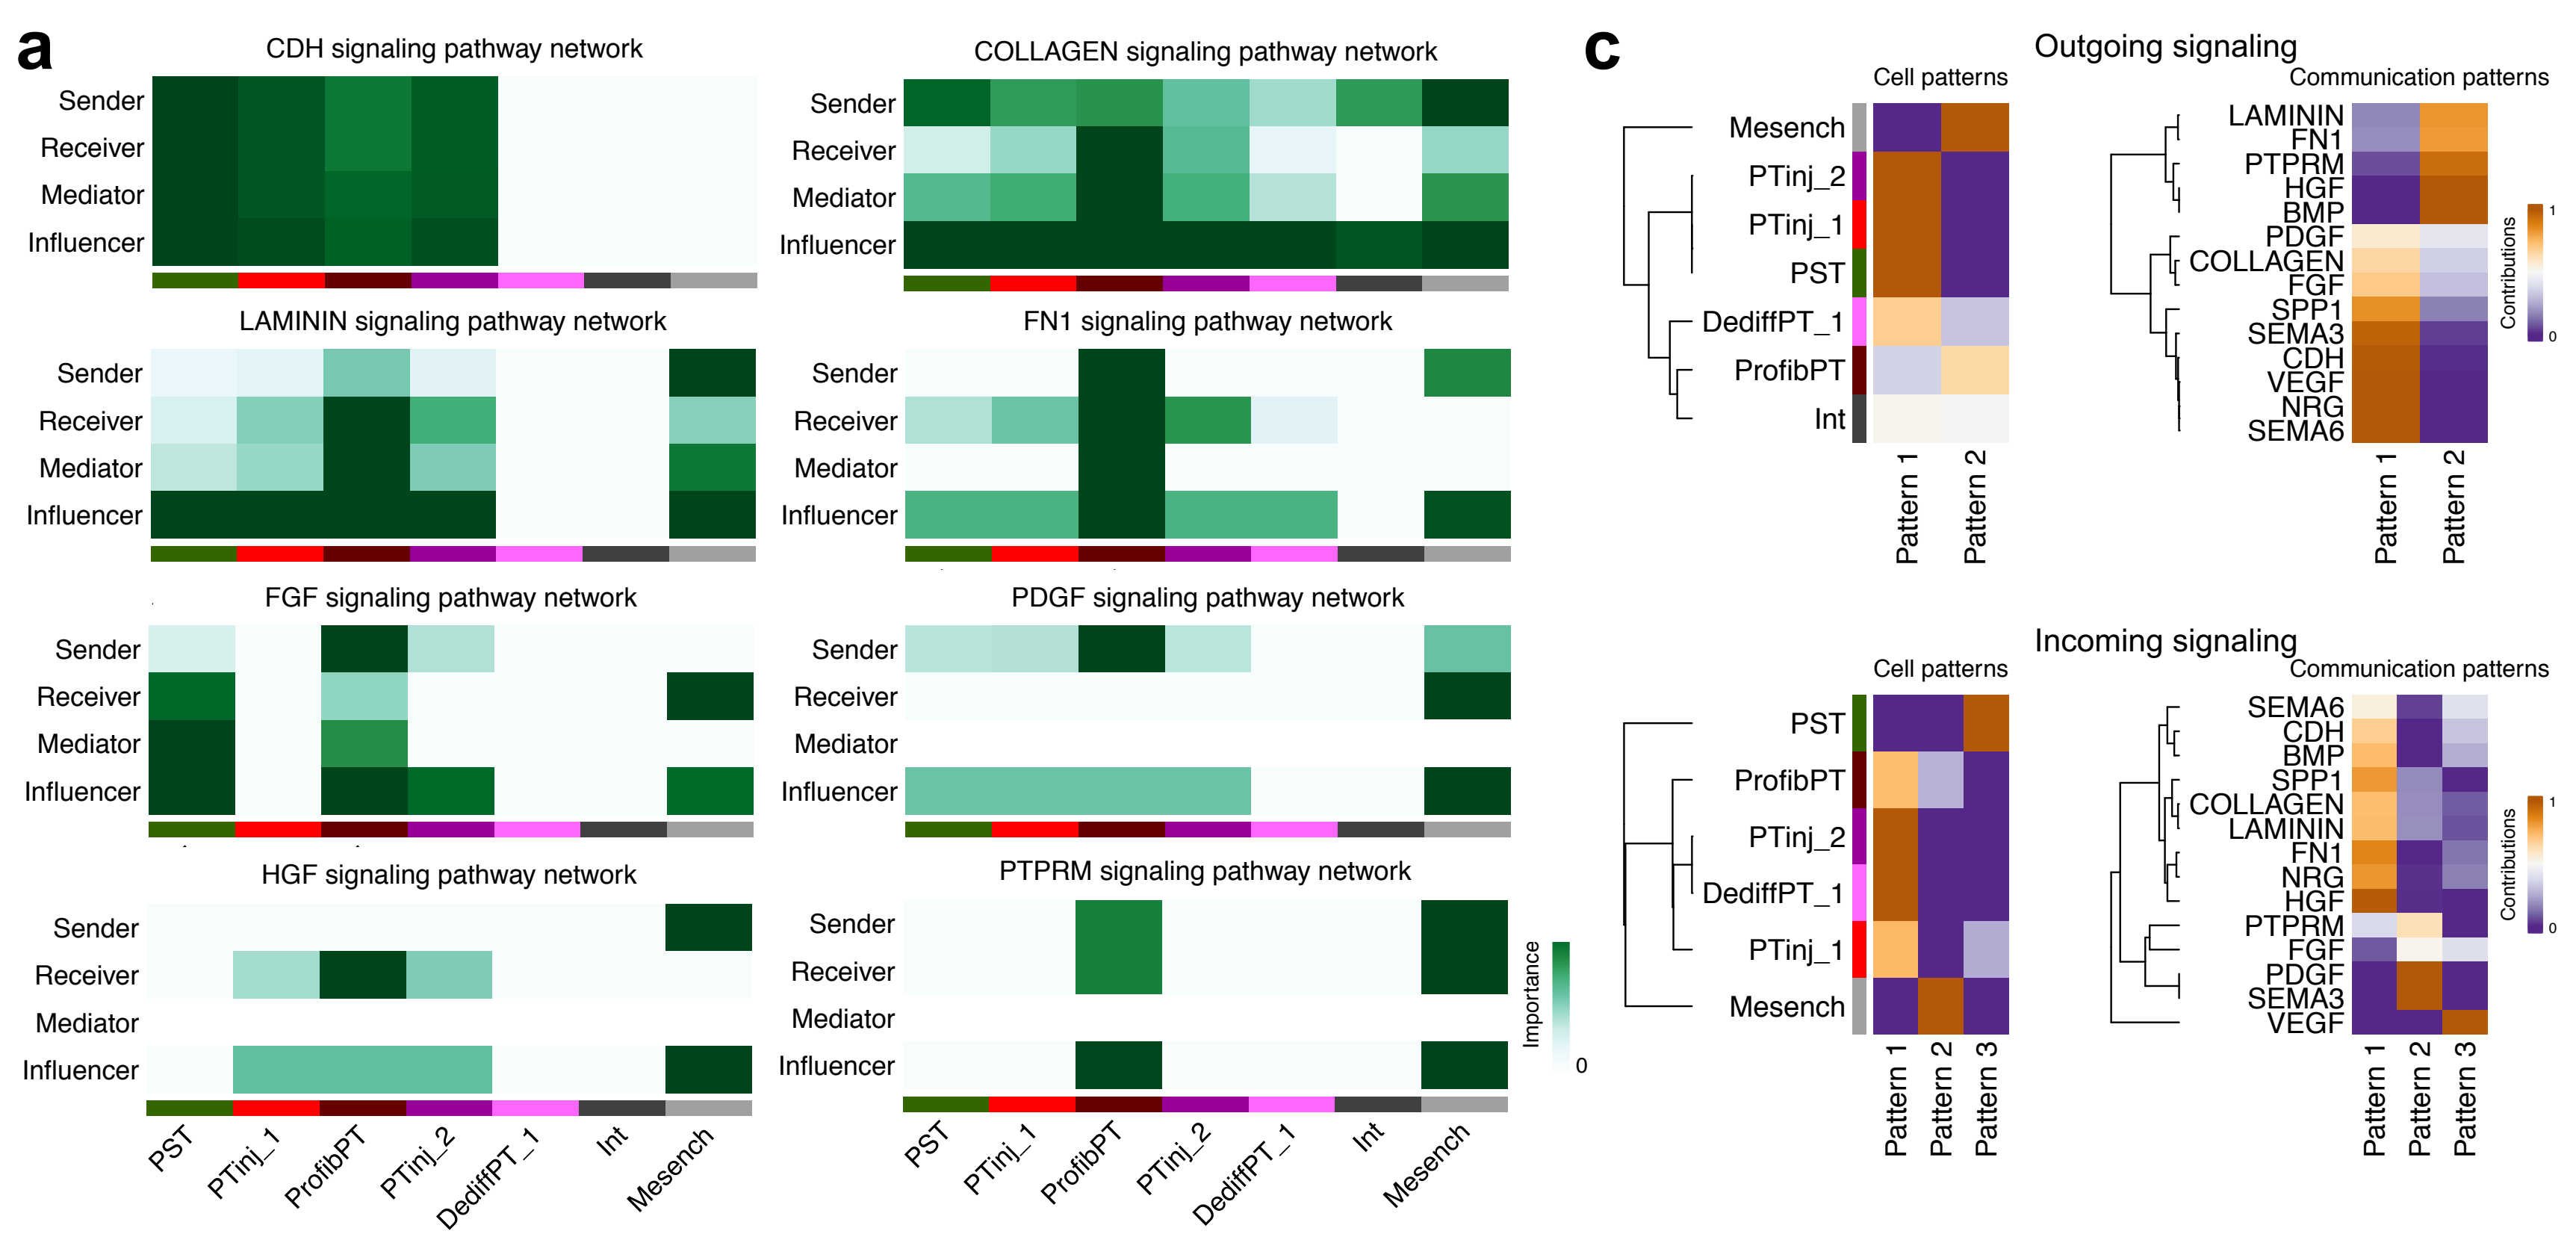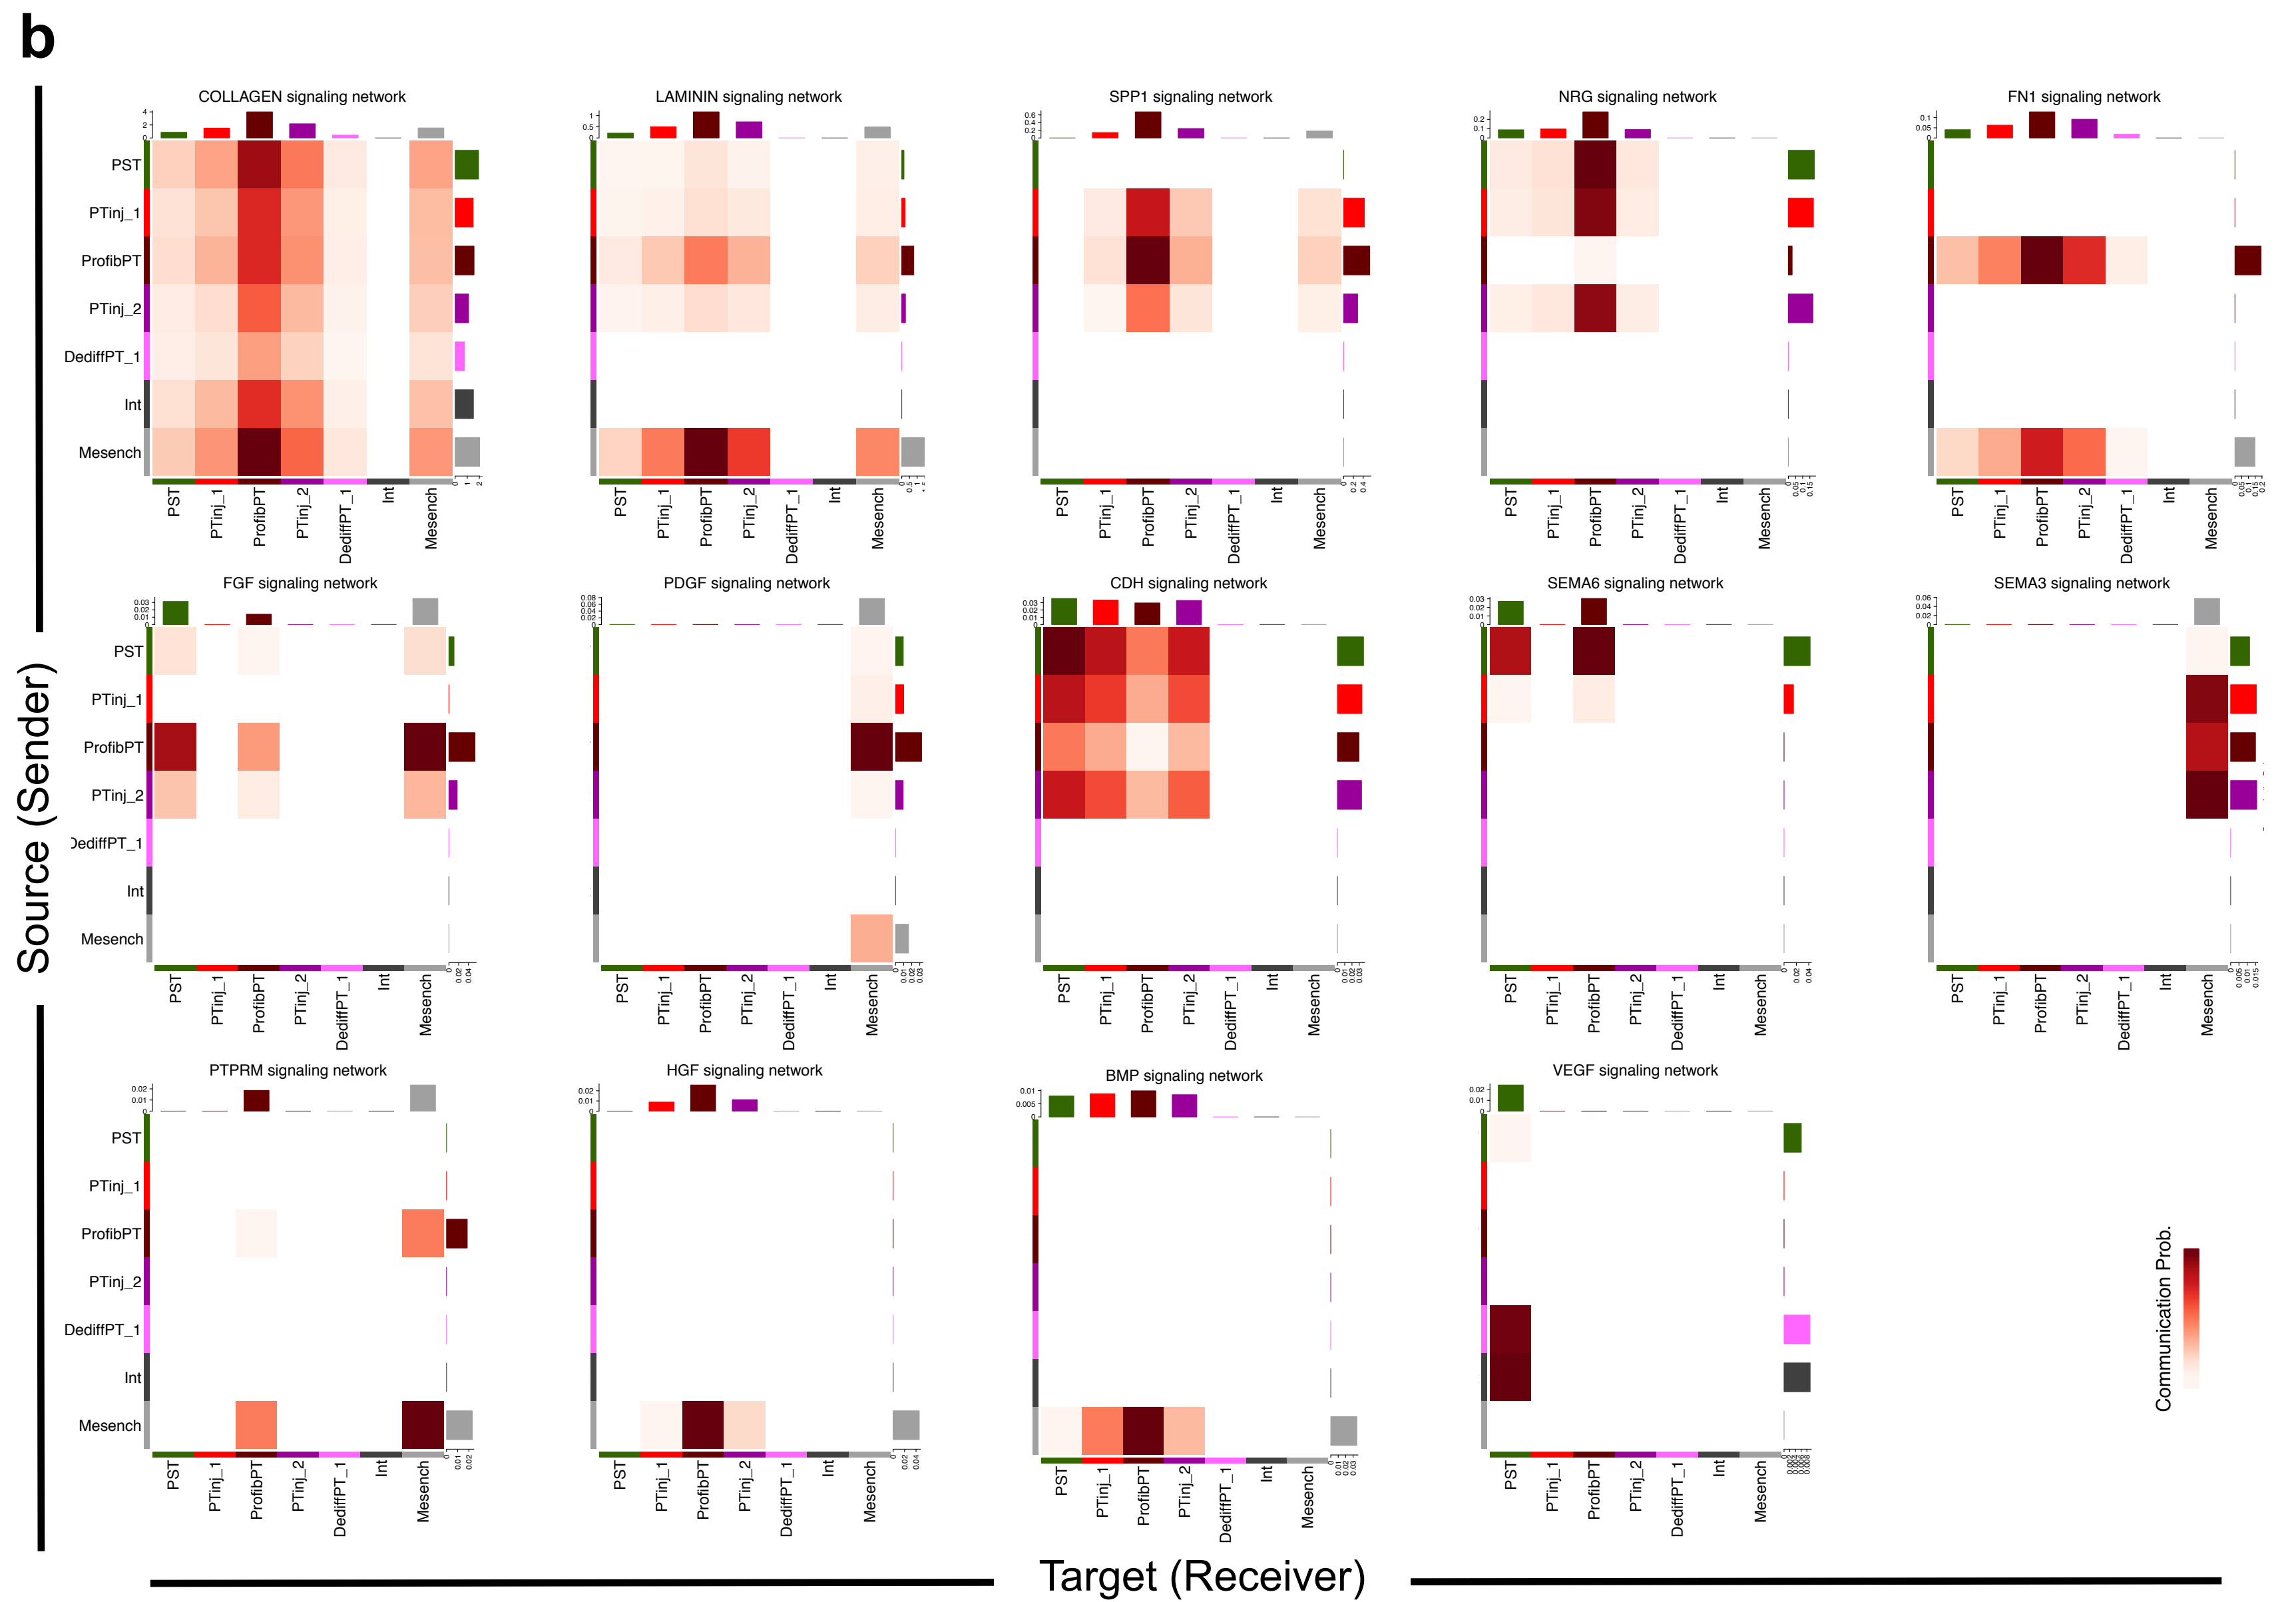

**Figure S10. Cell-cell communication analysis identifies a secretory phenotype of profibrotic PT. Related to Figure 5.**

- (a) Importance of signaling (sender, receiver, mediator, influencer) roles, as computed by CellChat centrality scores, stratified by cell clusters along the PT-Mesench trajectory, corresponding to **Fig. 5**. PST, proximal straight tubule; PTinj, injured PT; ProfibPT, profibrotic PT; DediffPT, dedifferentiated PT; Int, interstitial cell; Mesench, mesenchymal cell.
- (b) Communication probability between source/sender (rows) and target/receiver cell clusters (columns) along the PT-Mesench trajectory, displayed individually for various signaling pathways.
- (c) Communication patterns for outgoing (top) and incoming (bottom) signaling. Degree of contribution is plotted by cell clusters along the trajectory (left) and by signaling pathways (right), respectively.

**a**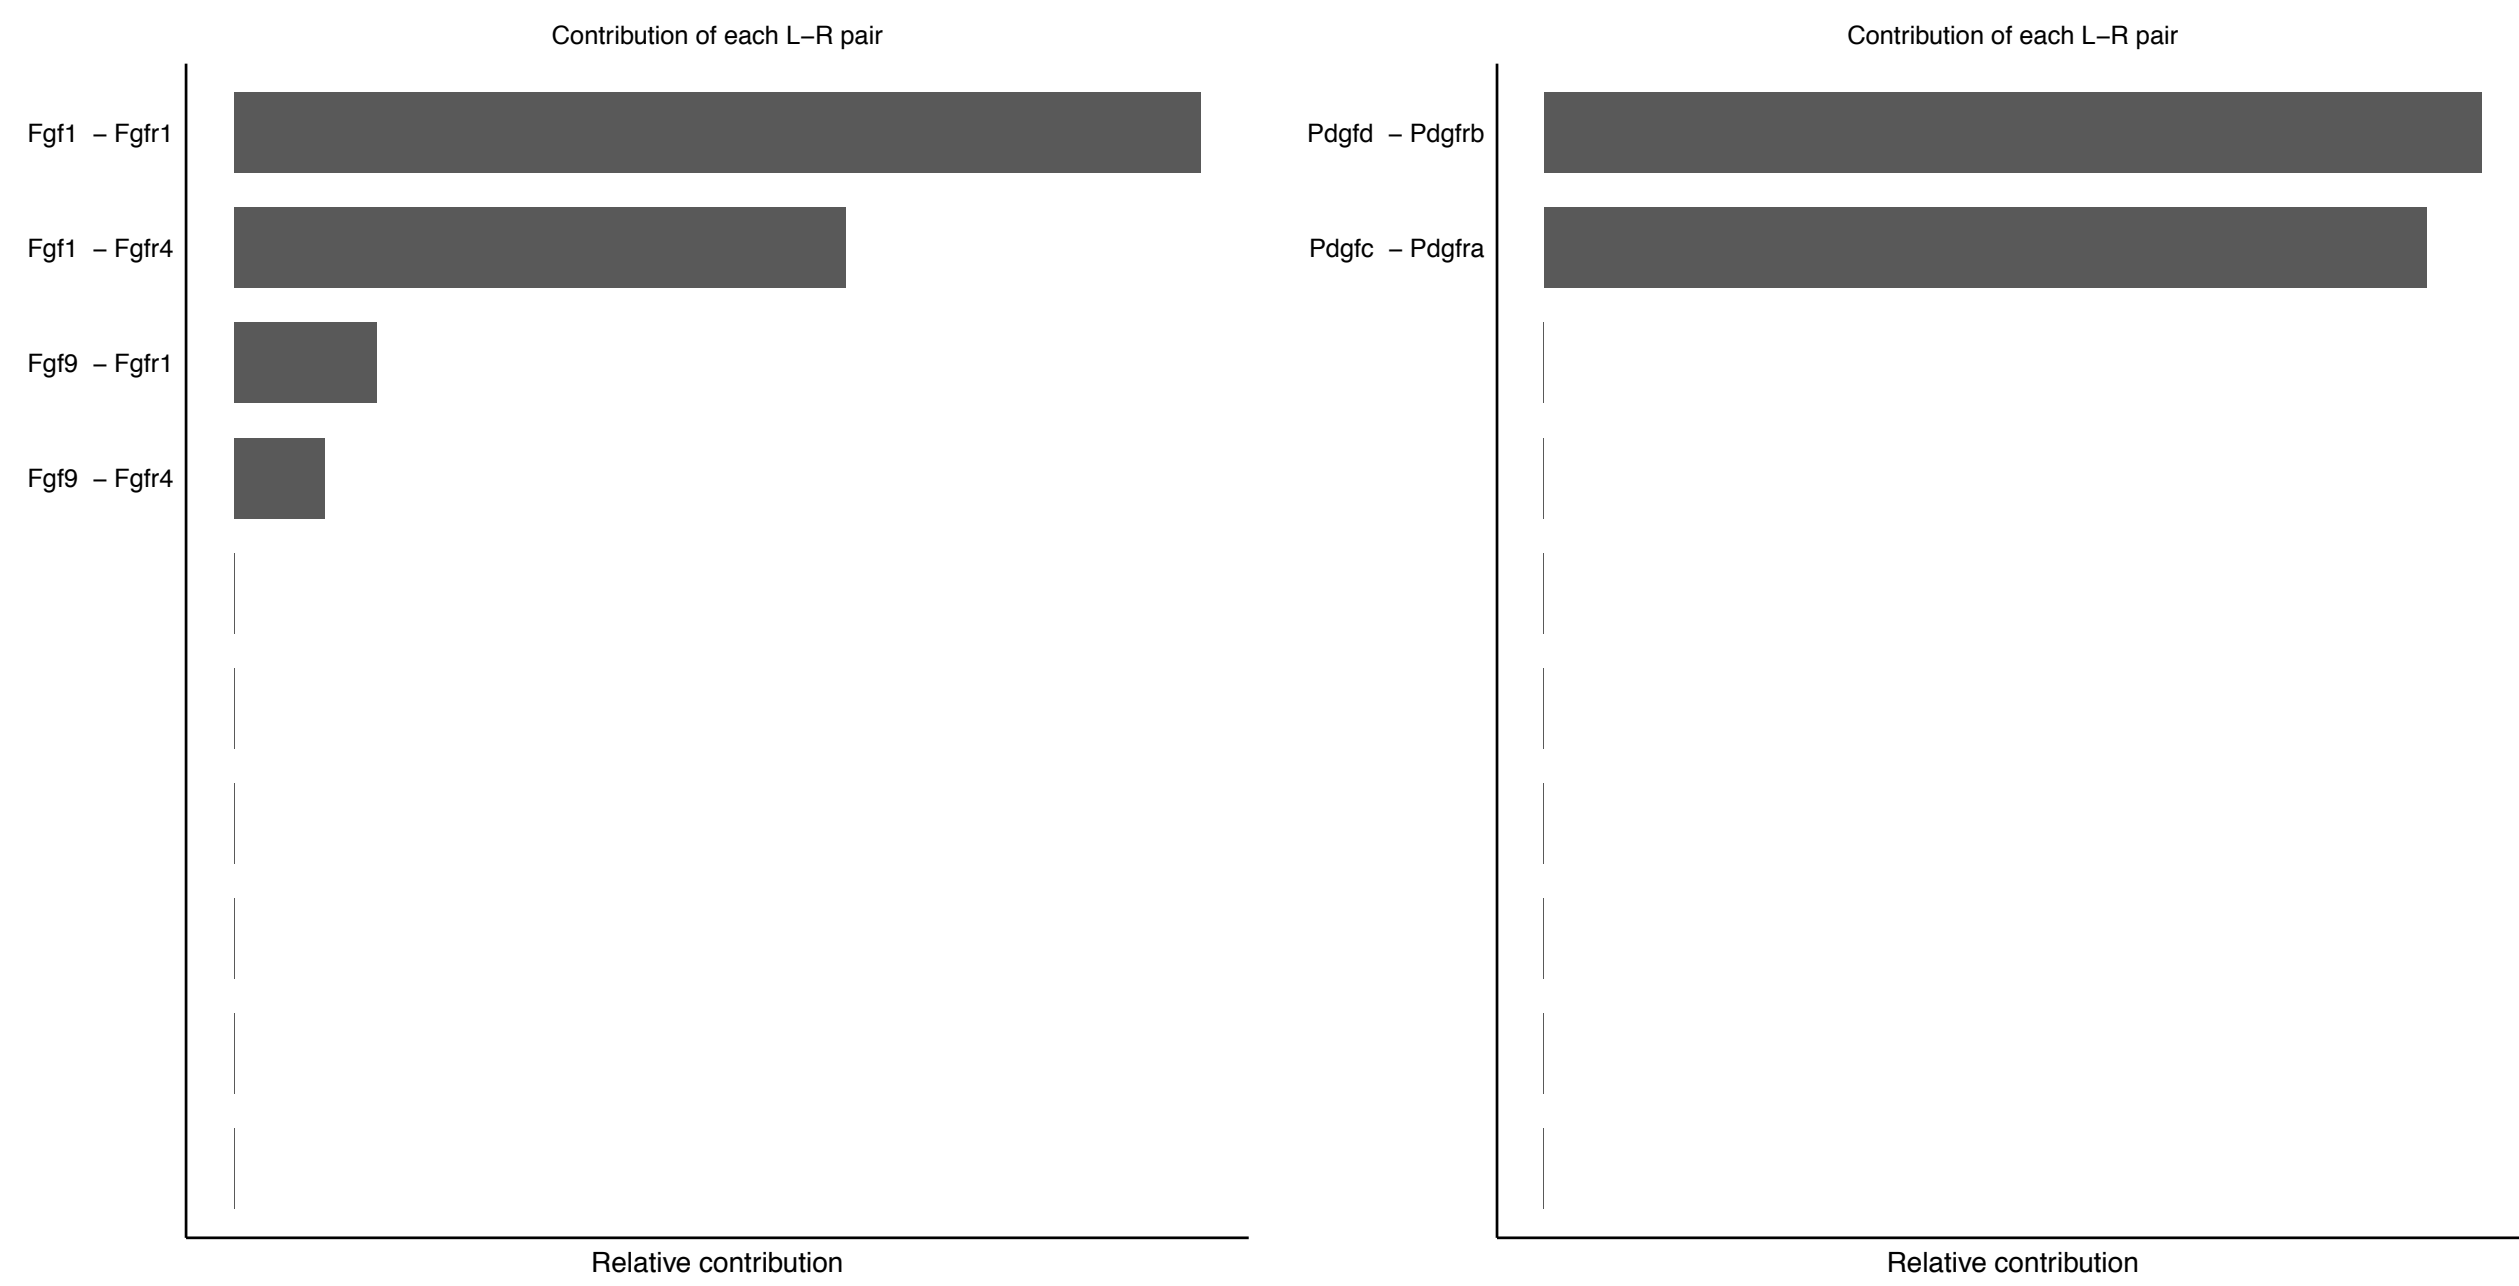**b**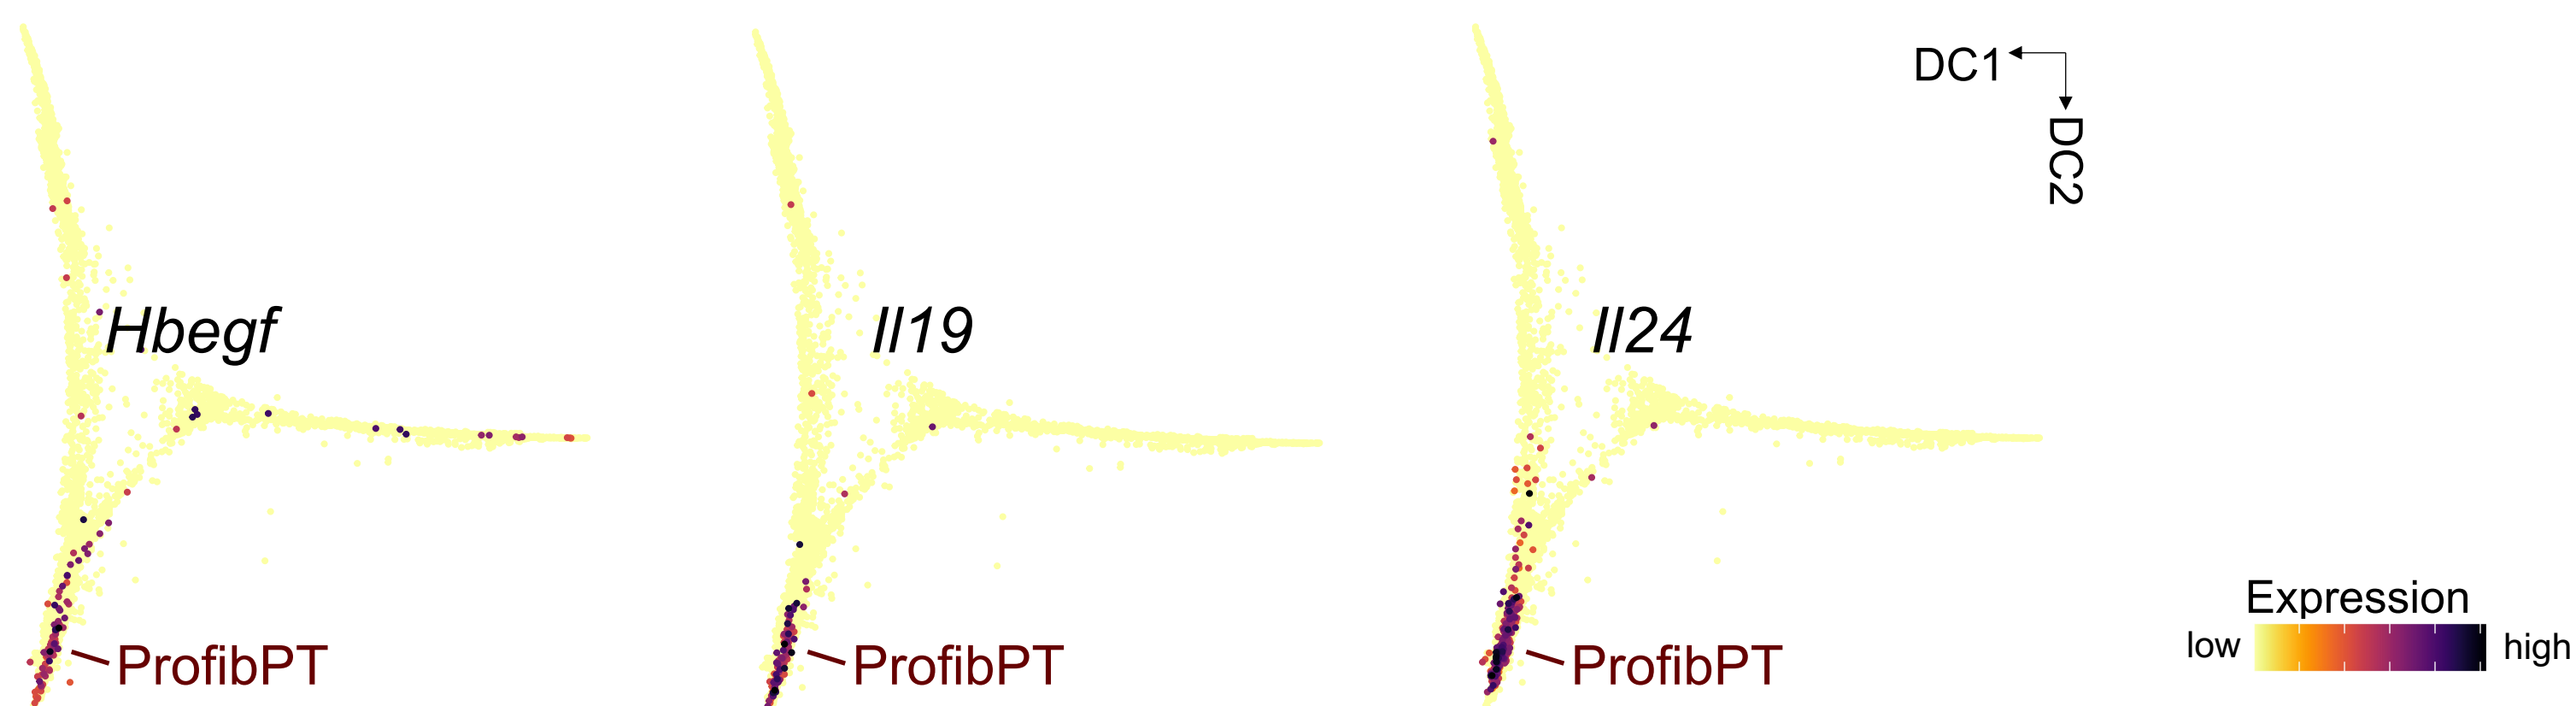**c**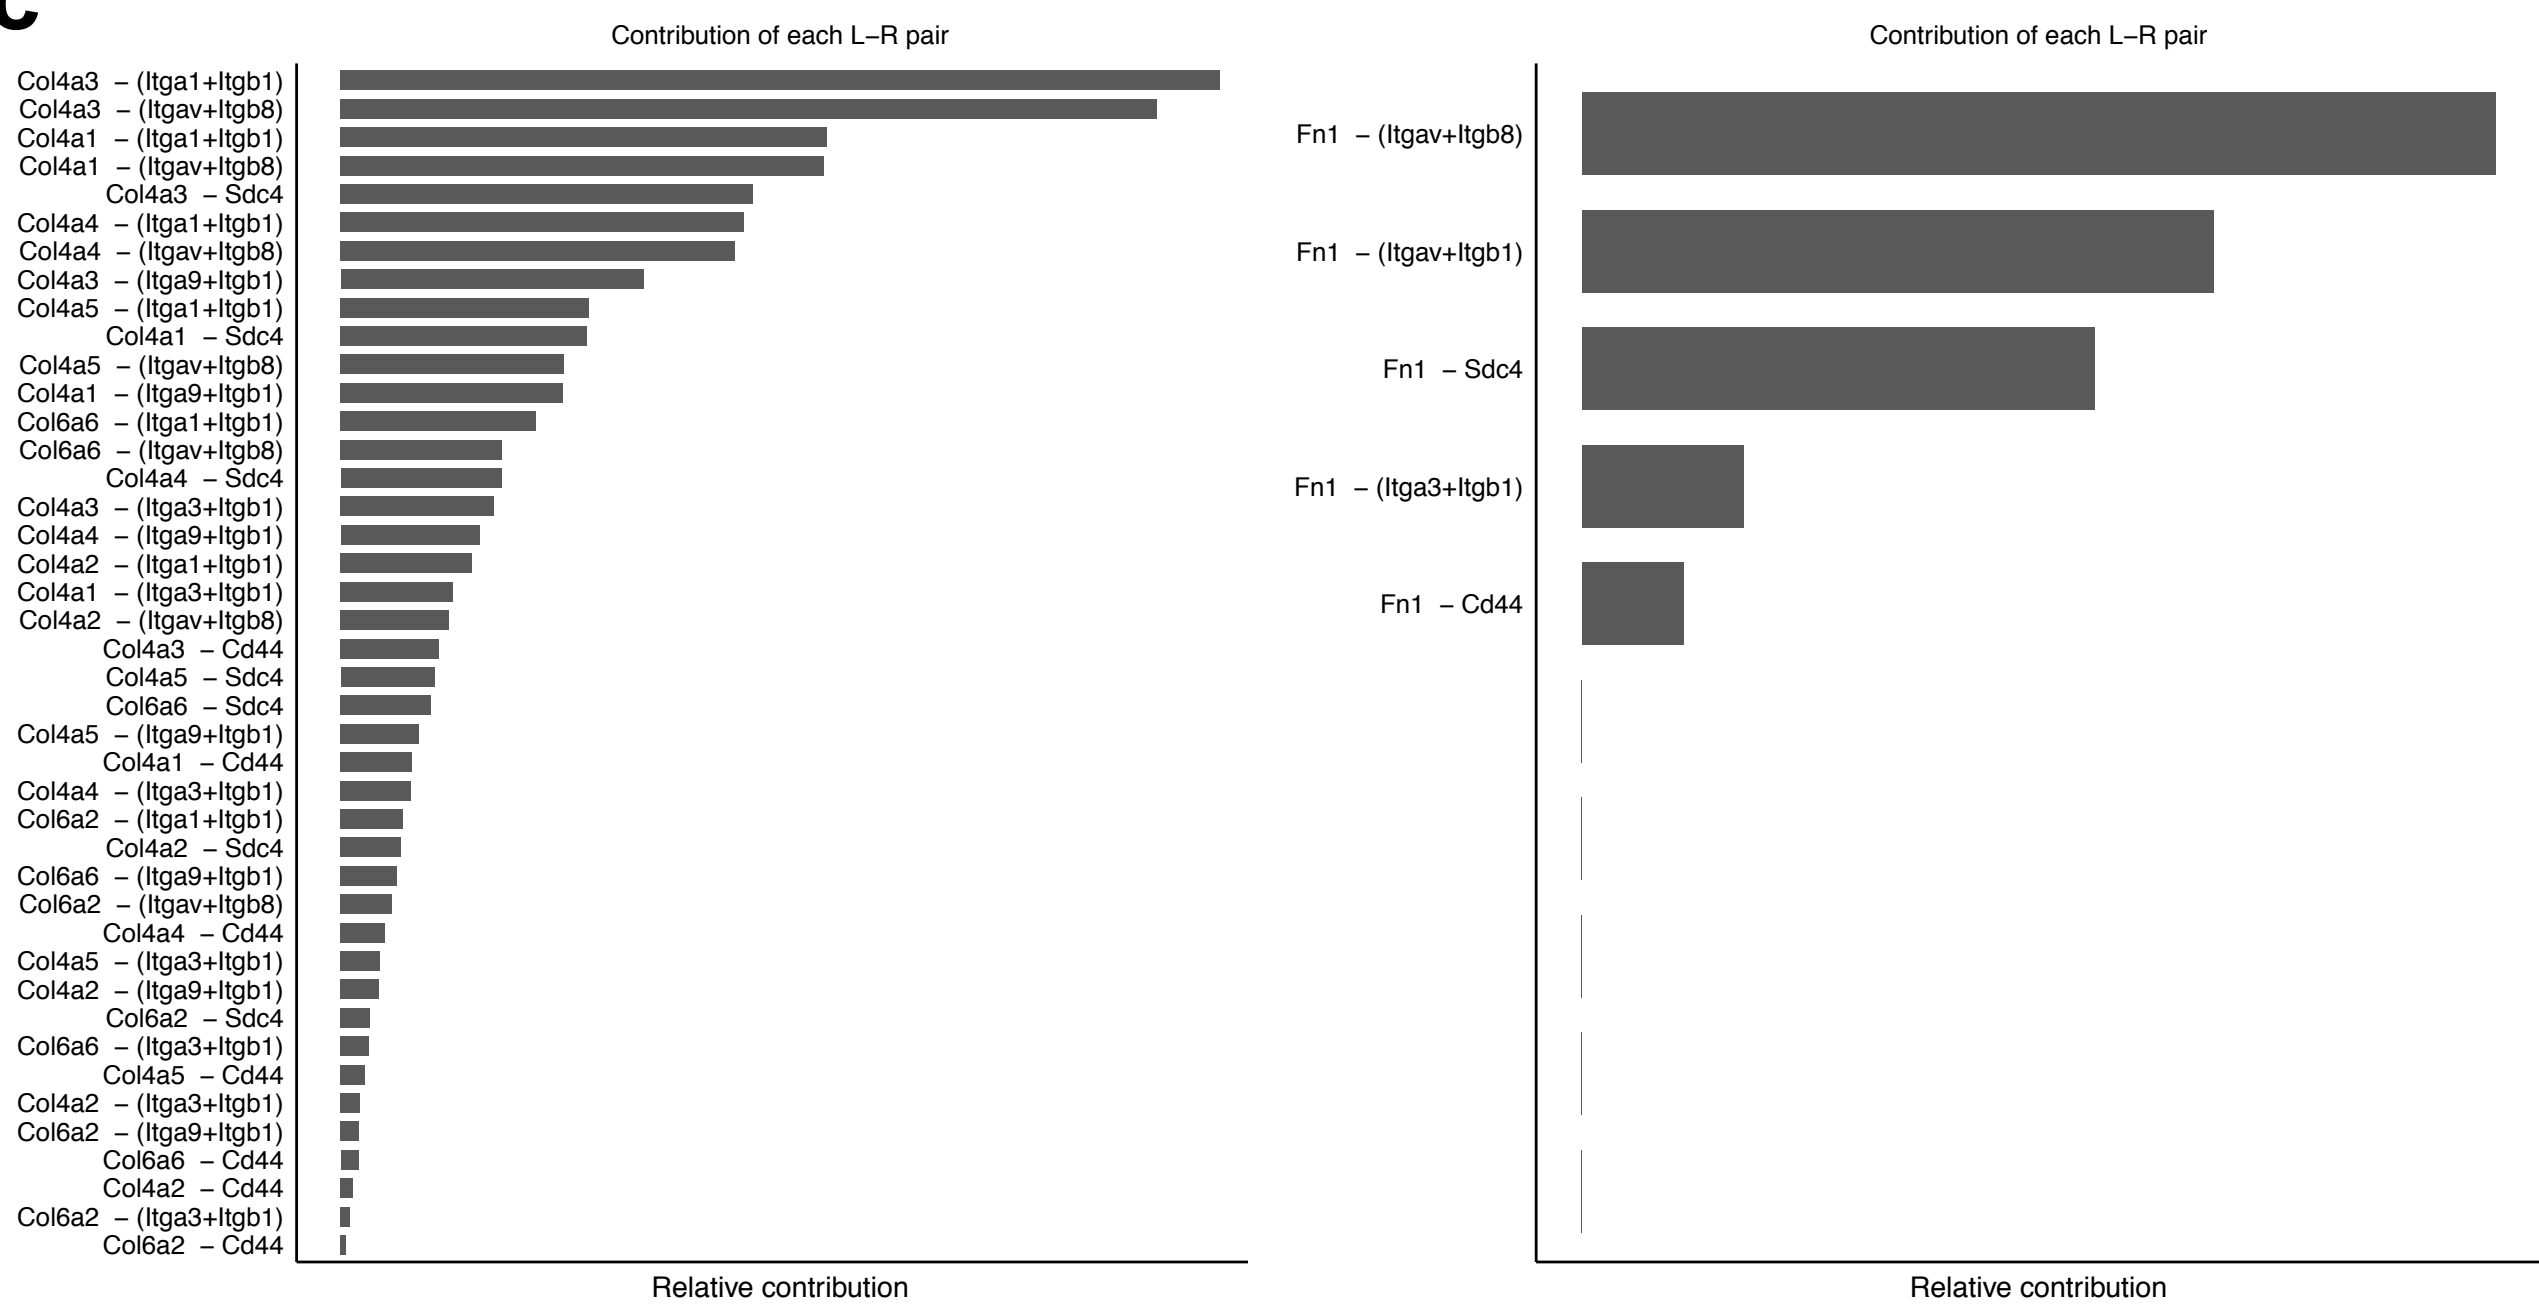**d**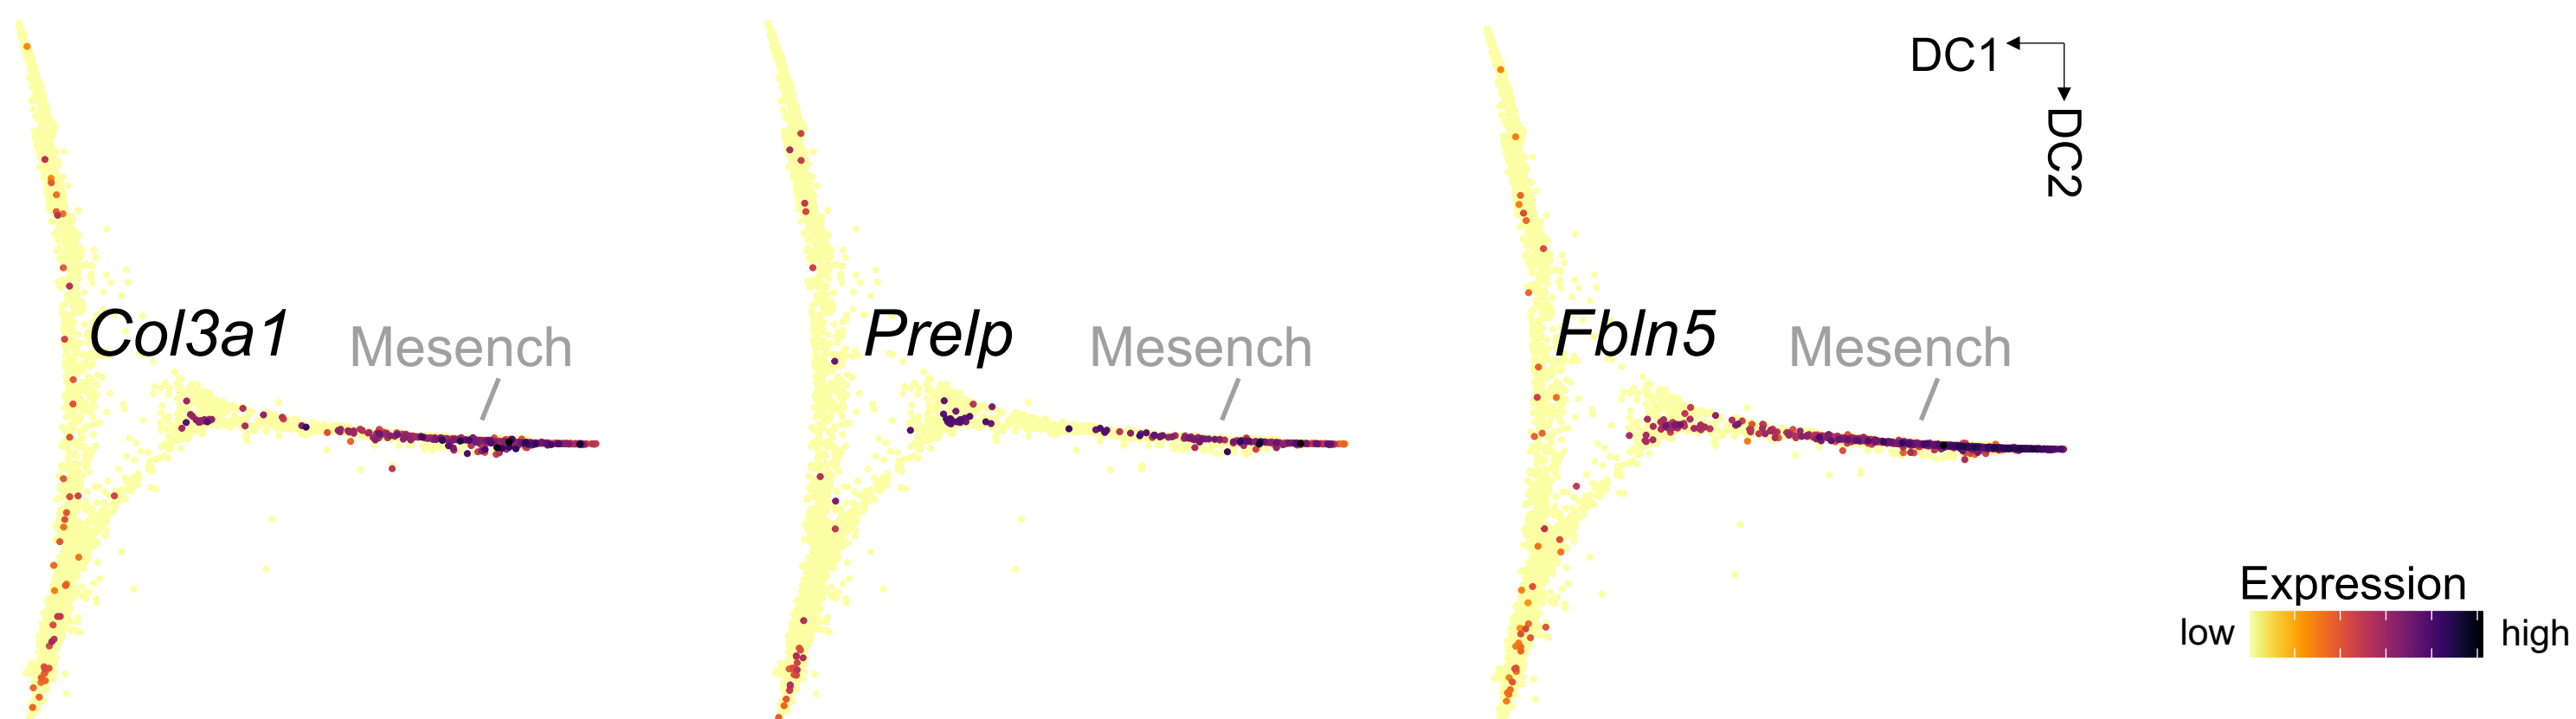



**Figure S11. Secretory and ECM-receptor phenotypes of profibrotic PT and mesenchymal cells, respectively.**

**Related to Figure 5.**

- (a, c) Relative contribution of secreted extracellular matrix (ECM) factors **(a)** and ECM-receptor signaling **(b)**.
- (b, d) Feature plots for representative secreted ECM factor genes (*Hbegf*, *Il19*, *Il24*) **(b)** and representative core matrisome genes (*Col3a1*, *Prelp*, *Fbln5*) **(d)** along the trajectory in diffusion map space, corresponding to **Figs. 5g, j**. ProfibPT, profibrotic PT; Mesench, mesenchymal cell.

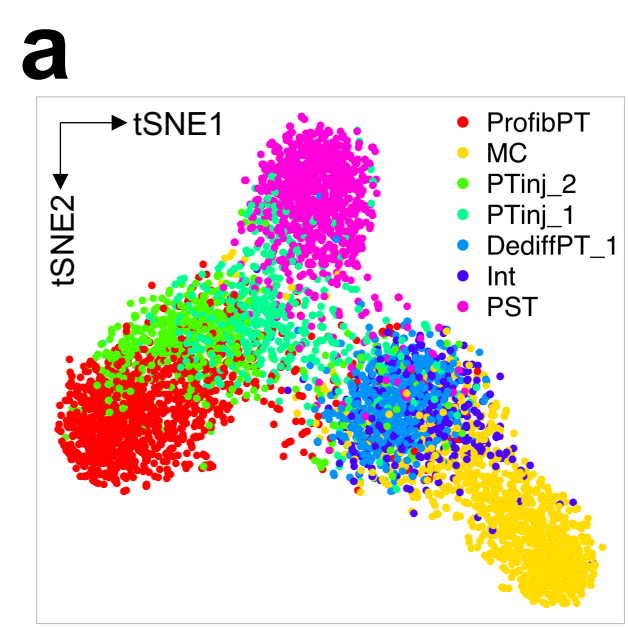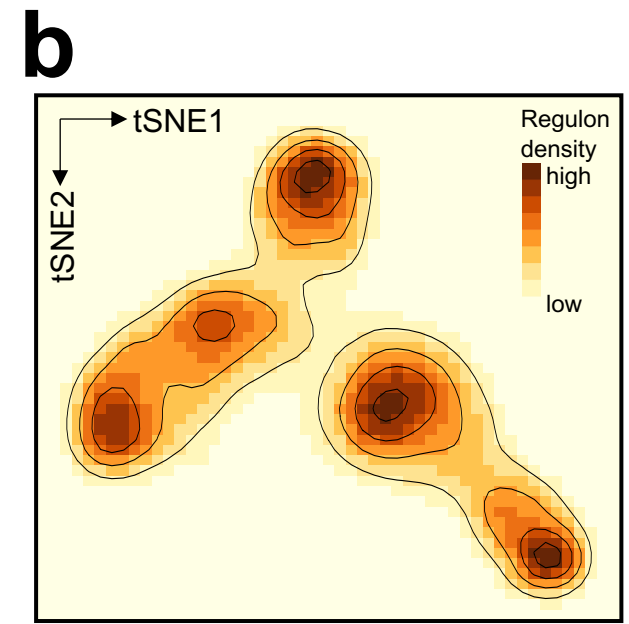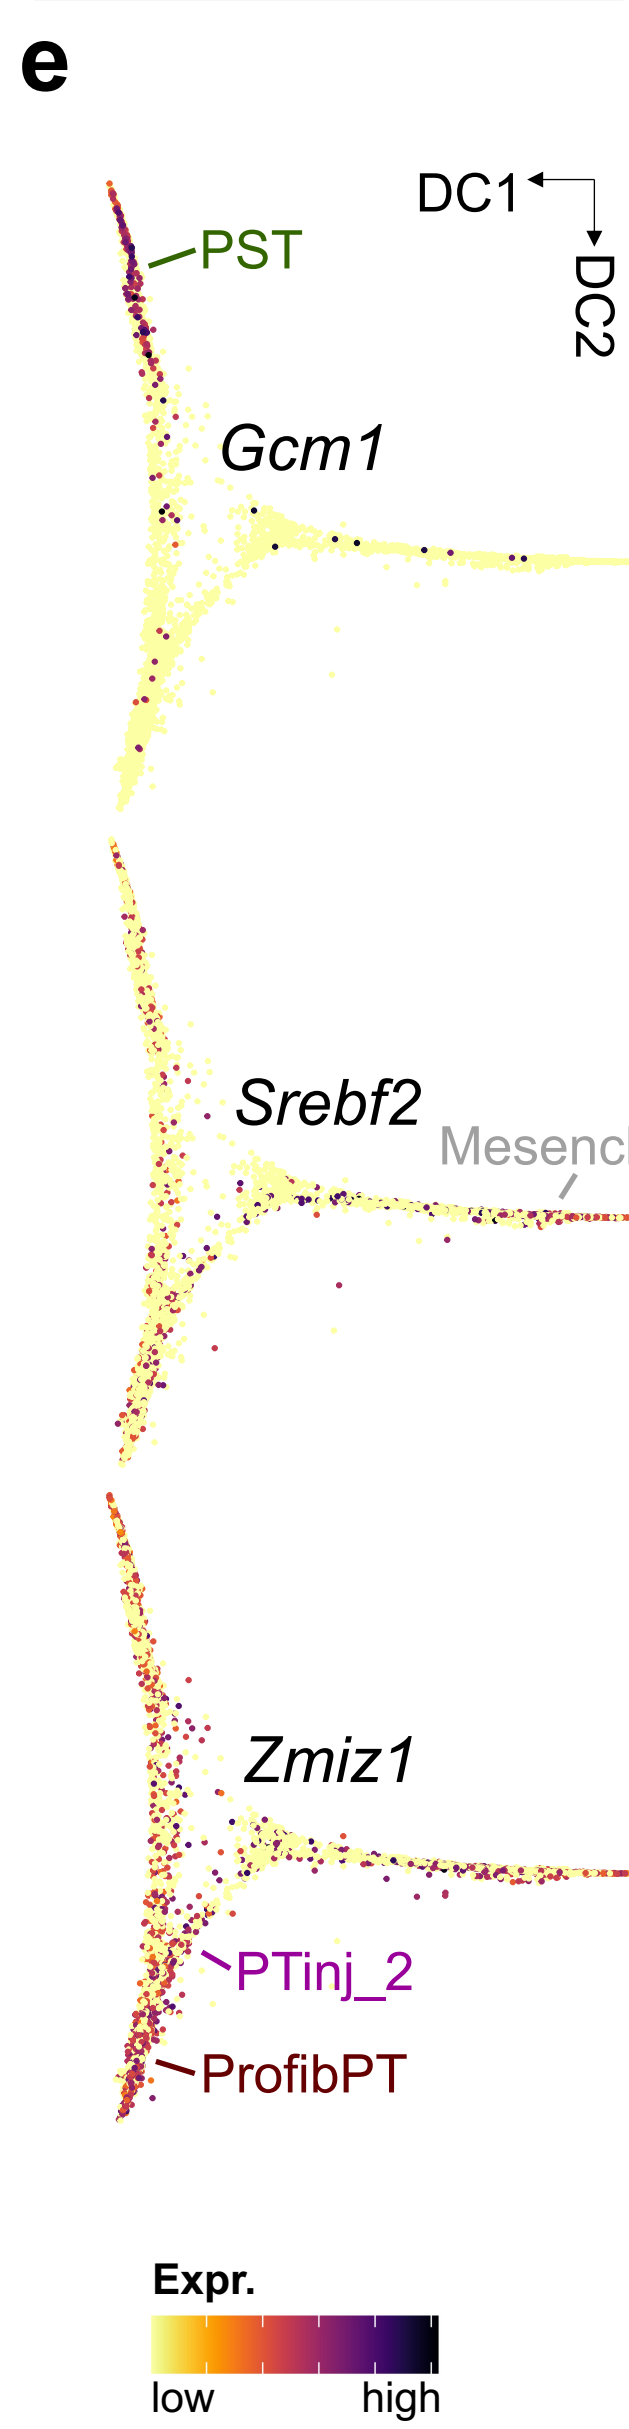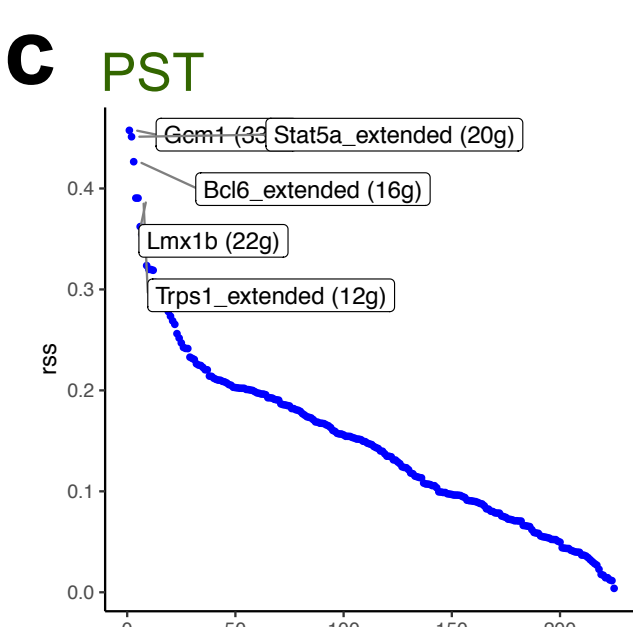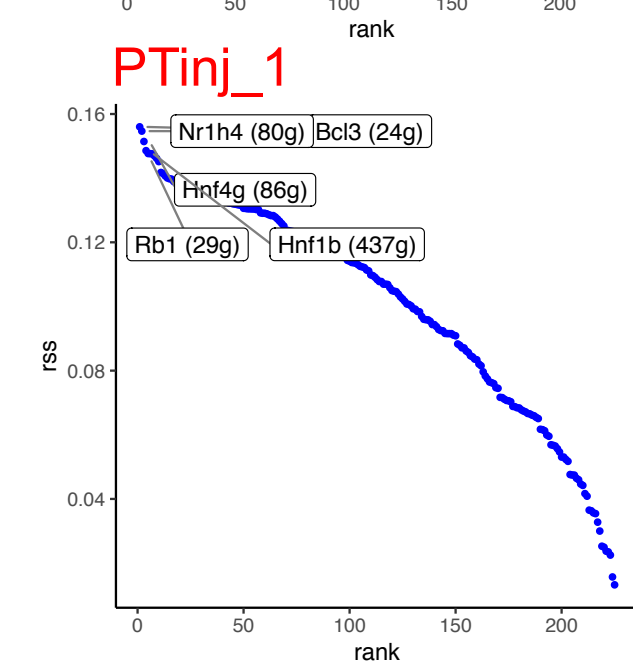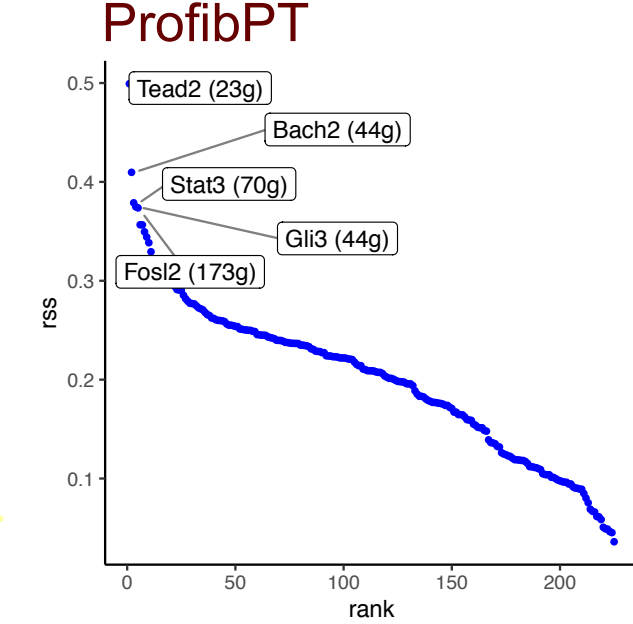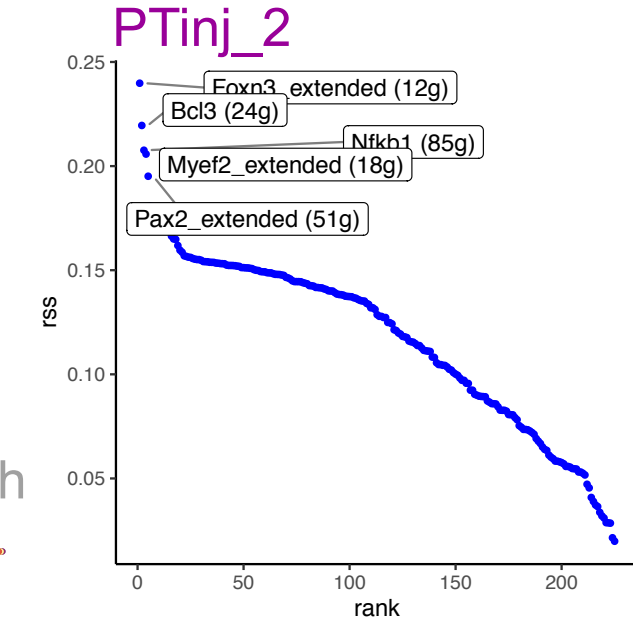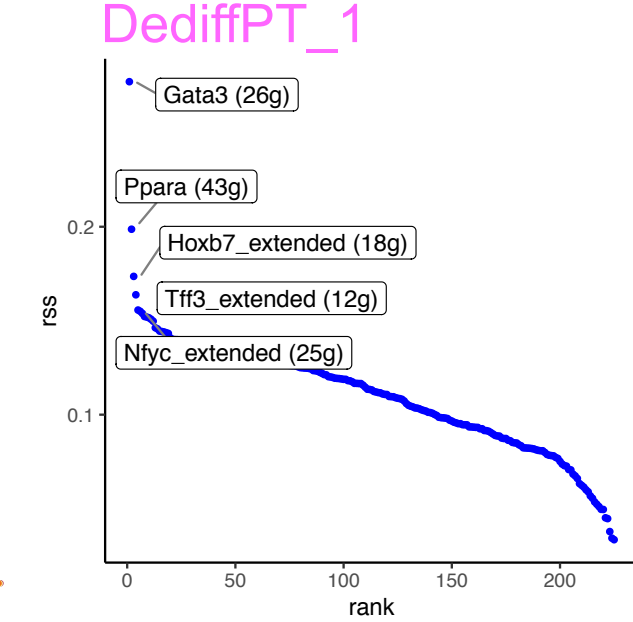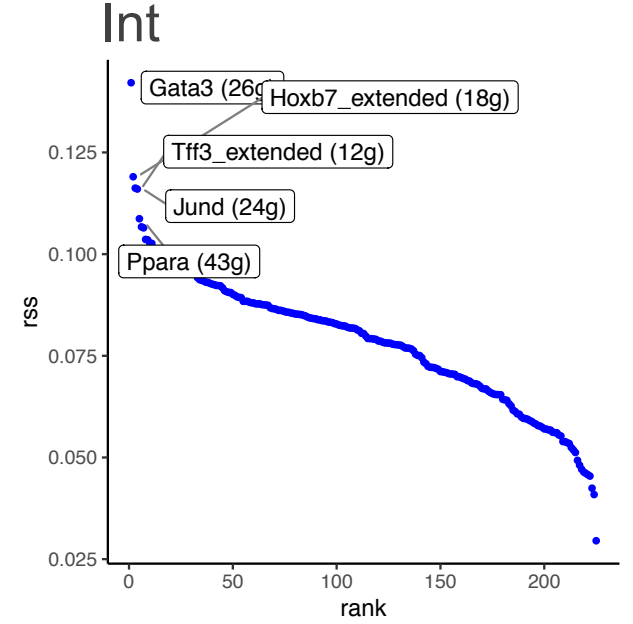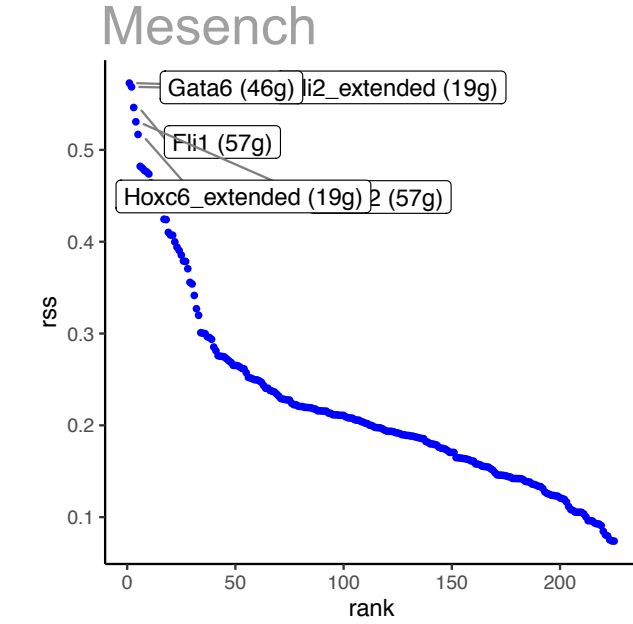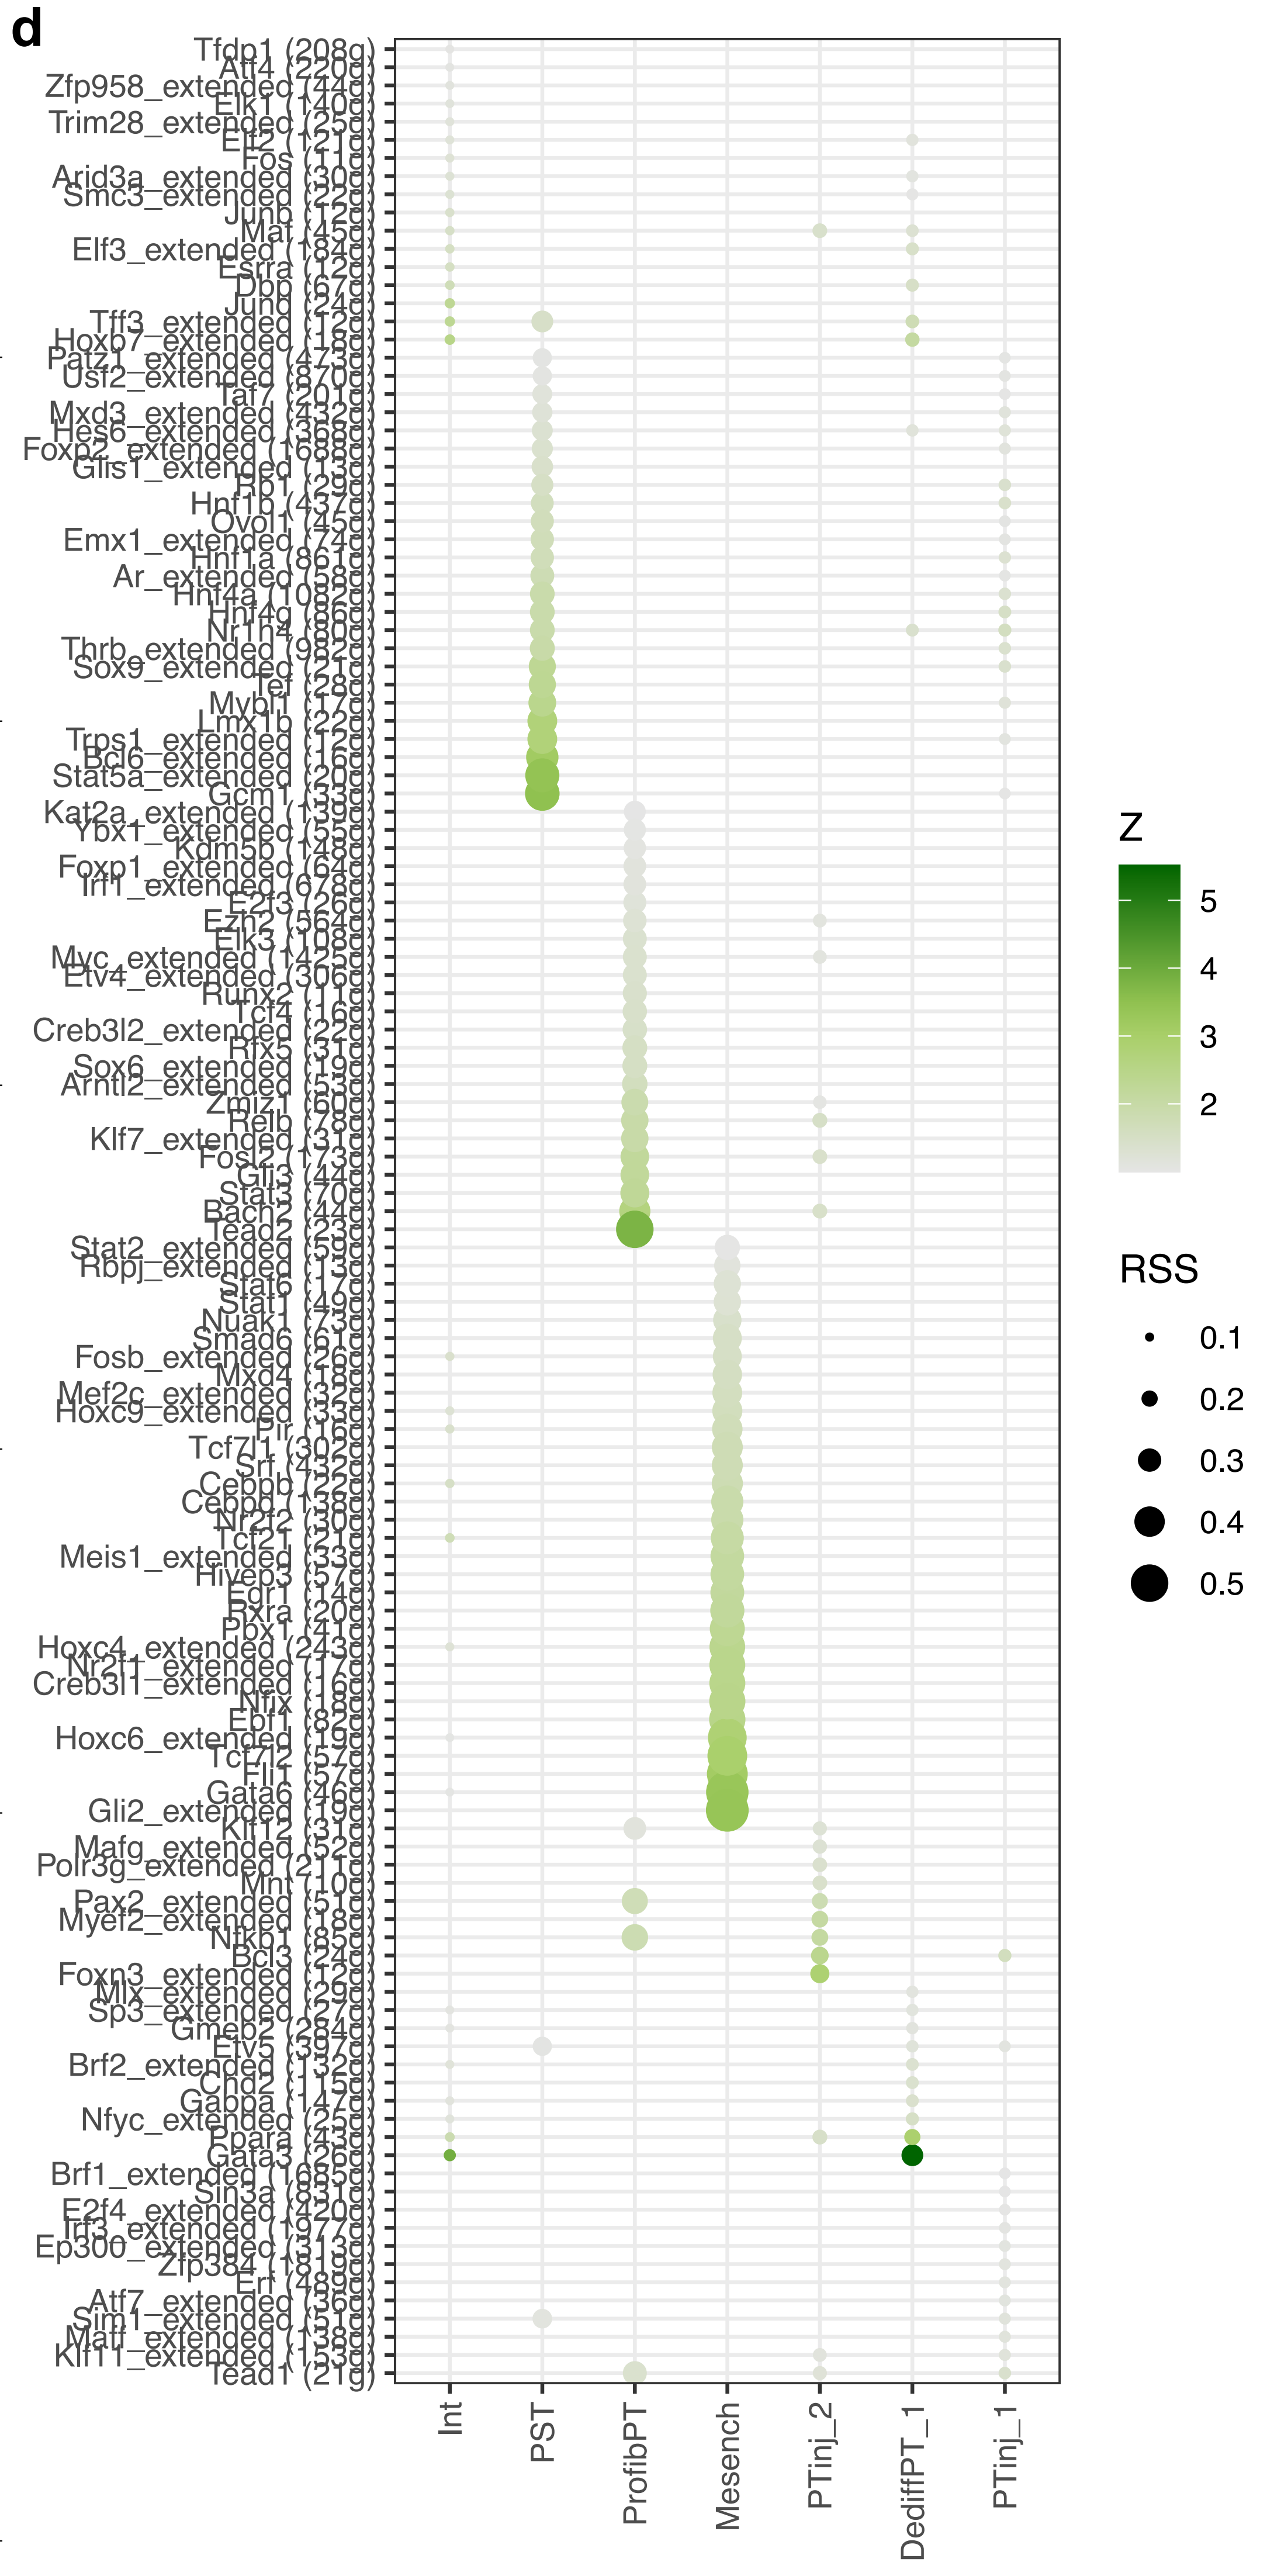

**Figure S12. Gene regulatory network analysis highlights cell type-specific transcription factors driving the PT-to-mesenchymal trajectory and prioritizes cell types of action for sGC modulation. Related to Figure 6.**

- (a) t-distributed stochastic neighbor embedding (t-SNE) reduction plot of regulon-derived clustering of cell types along the PT-Mesench trajectory. PST, proximal straight tubule; PTinj, injured PT; ProfibPT, profibrotic PT; DediffPT, dedifferentiated PT; Int, interstitial cell; Mesench, mesenchymal cell.
- (b) tSNE representation of regulon density as a surrogate for stability of regulon states.
- (c) Regulons ranked according to their specificity scores (rss) for individual cell types along the PT-Mesench trajectory. The top 5 specific regulons per cell type are annotated.
- (d) Dot plot of regulons (rows) according to cell types along the PT-Mesench trajectory (columns). Dot size denotes regulon specificity score (RSS), color denotes z-scored RSS.

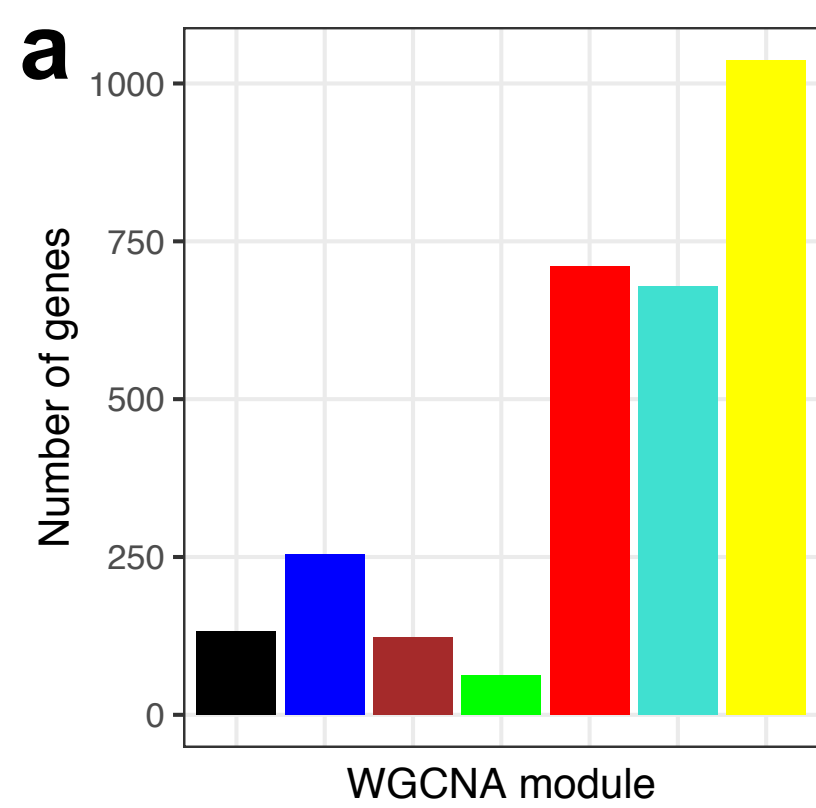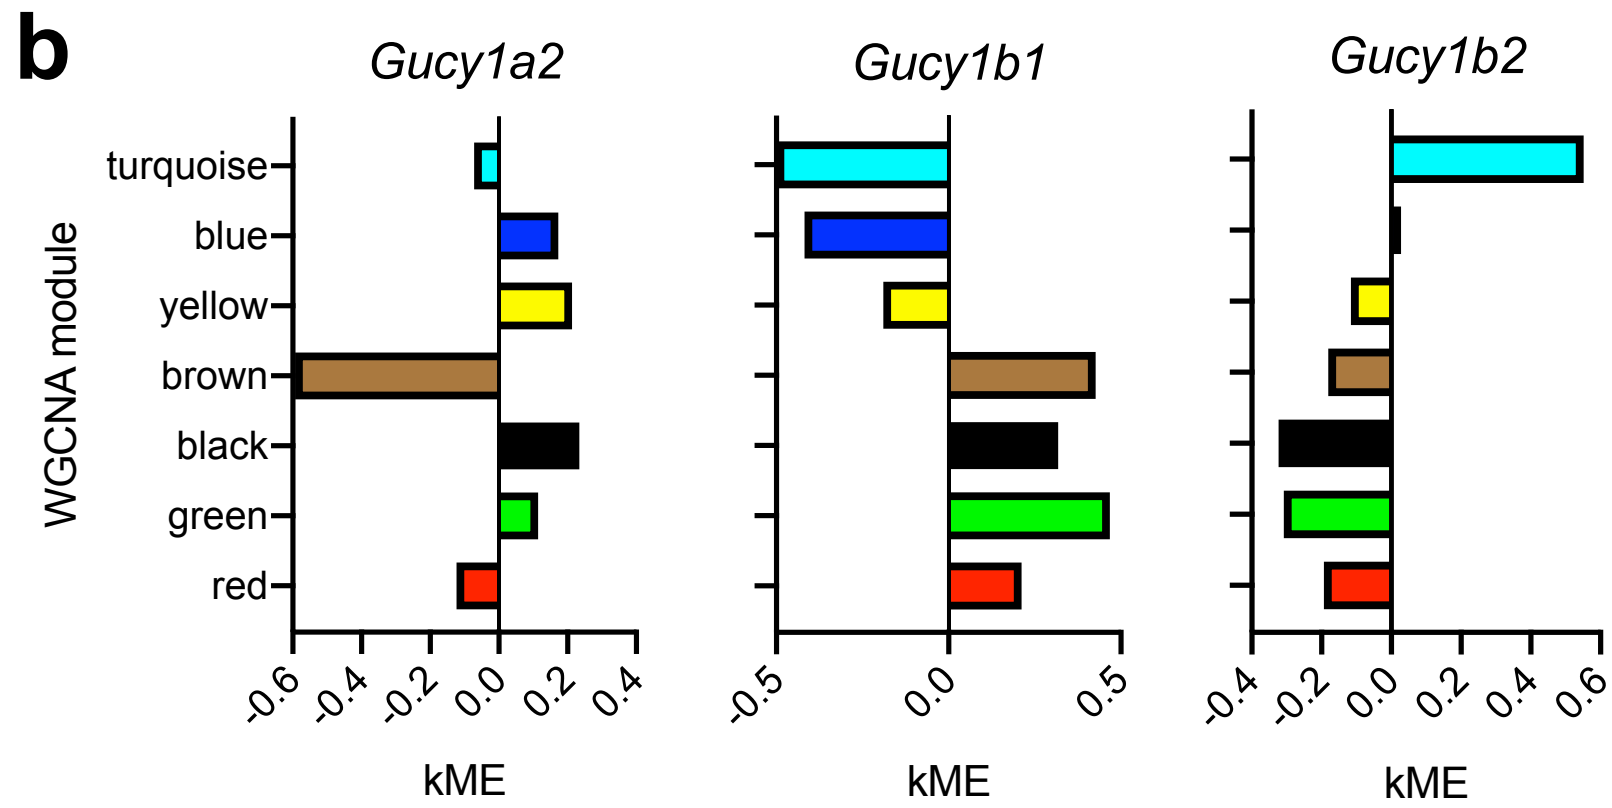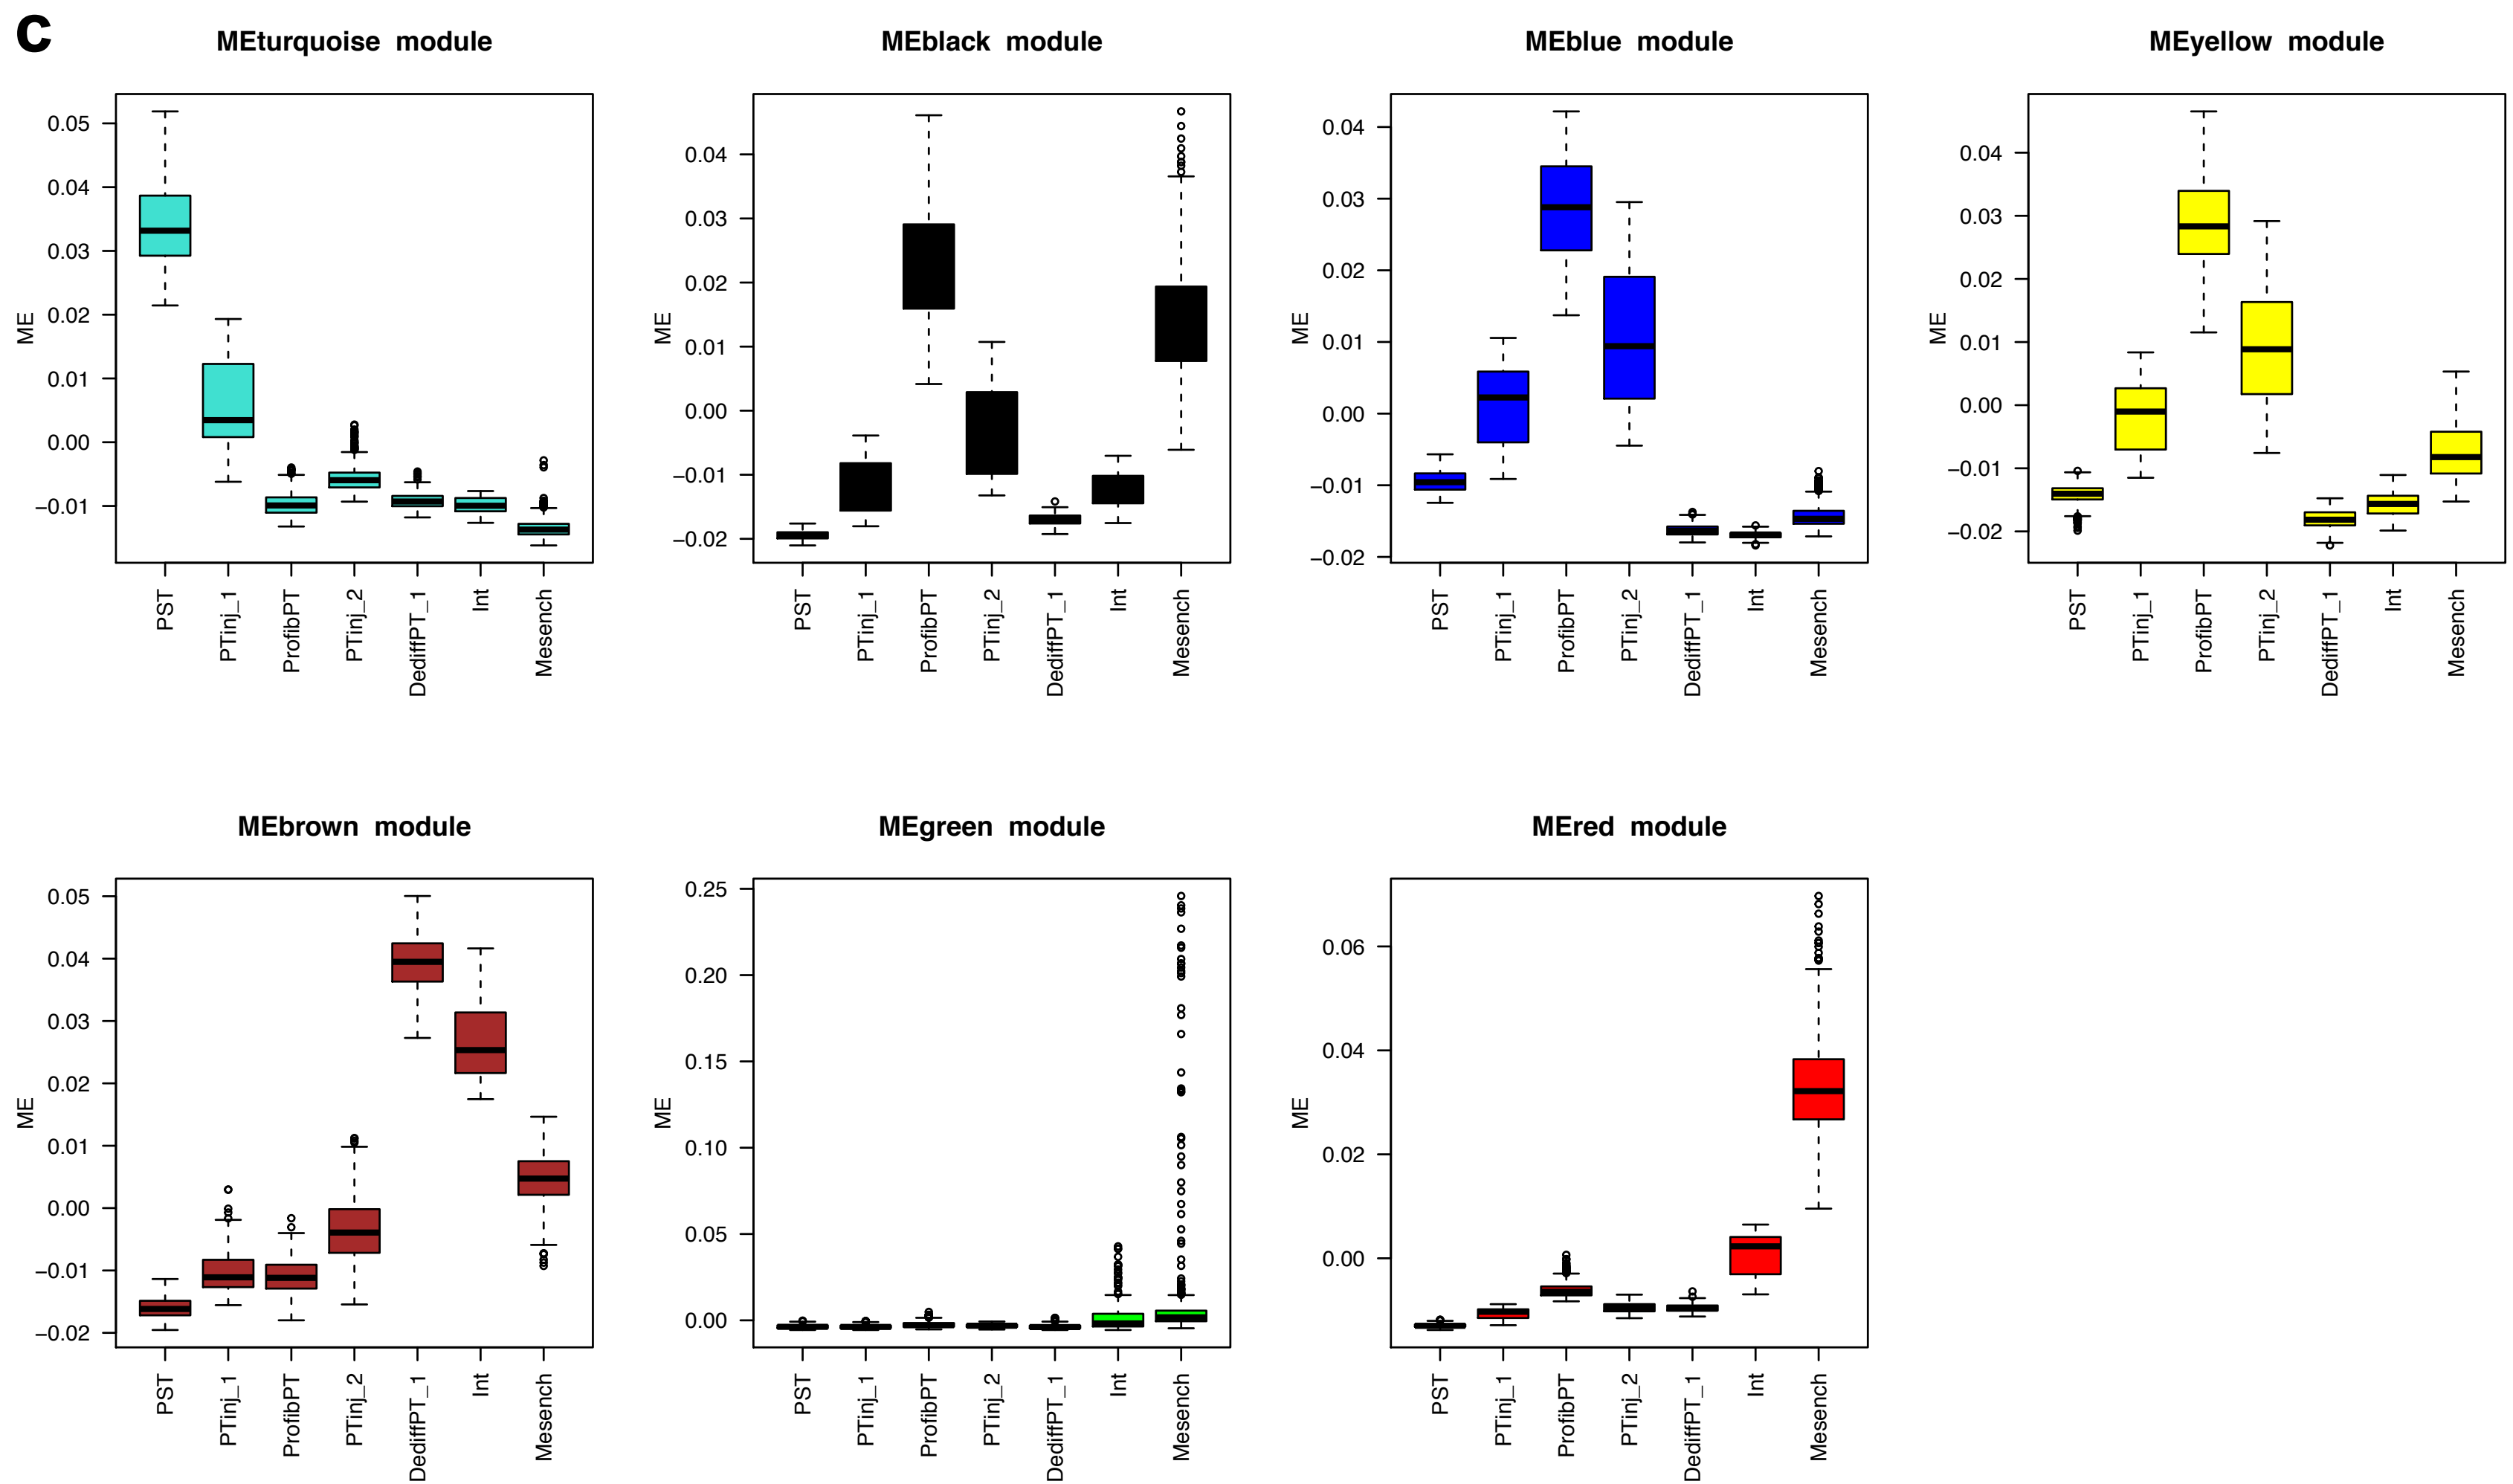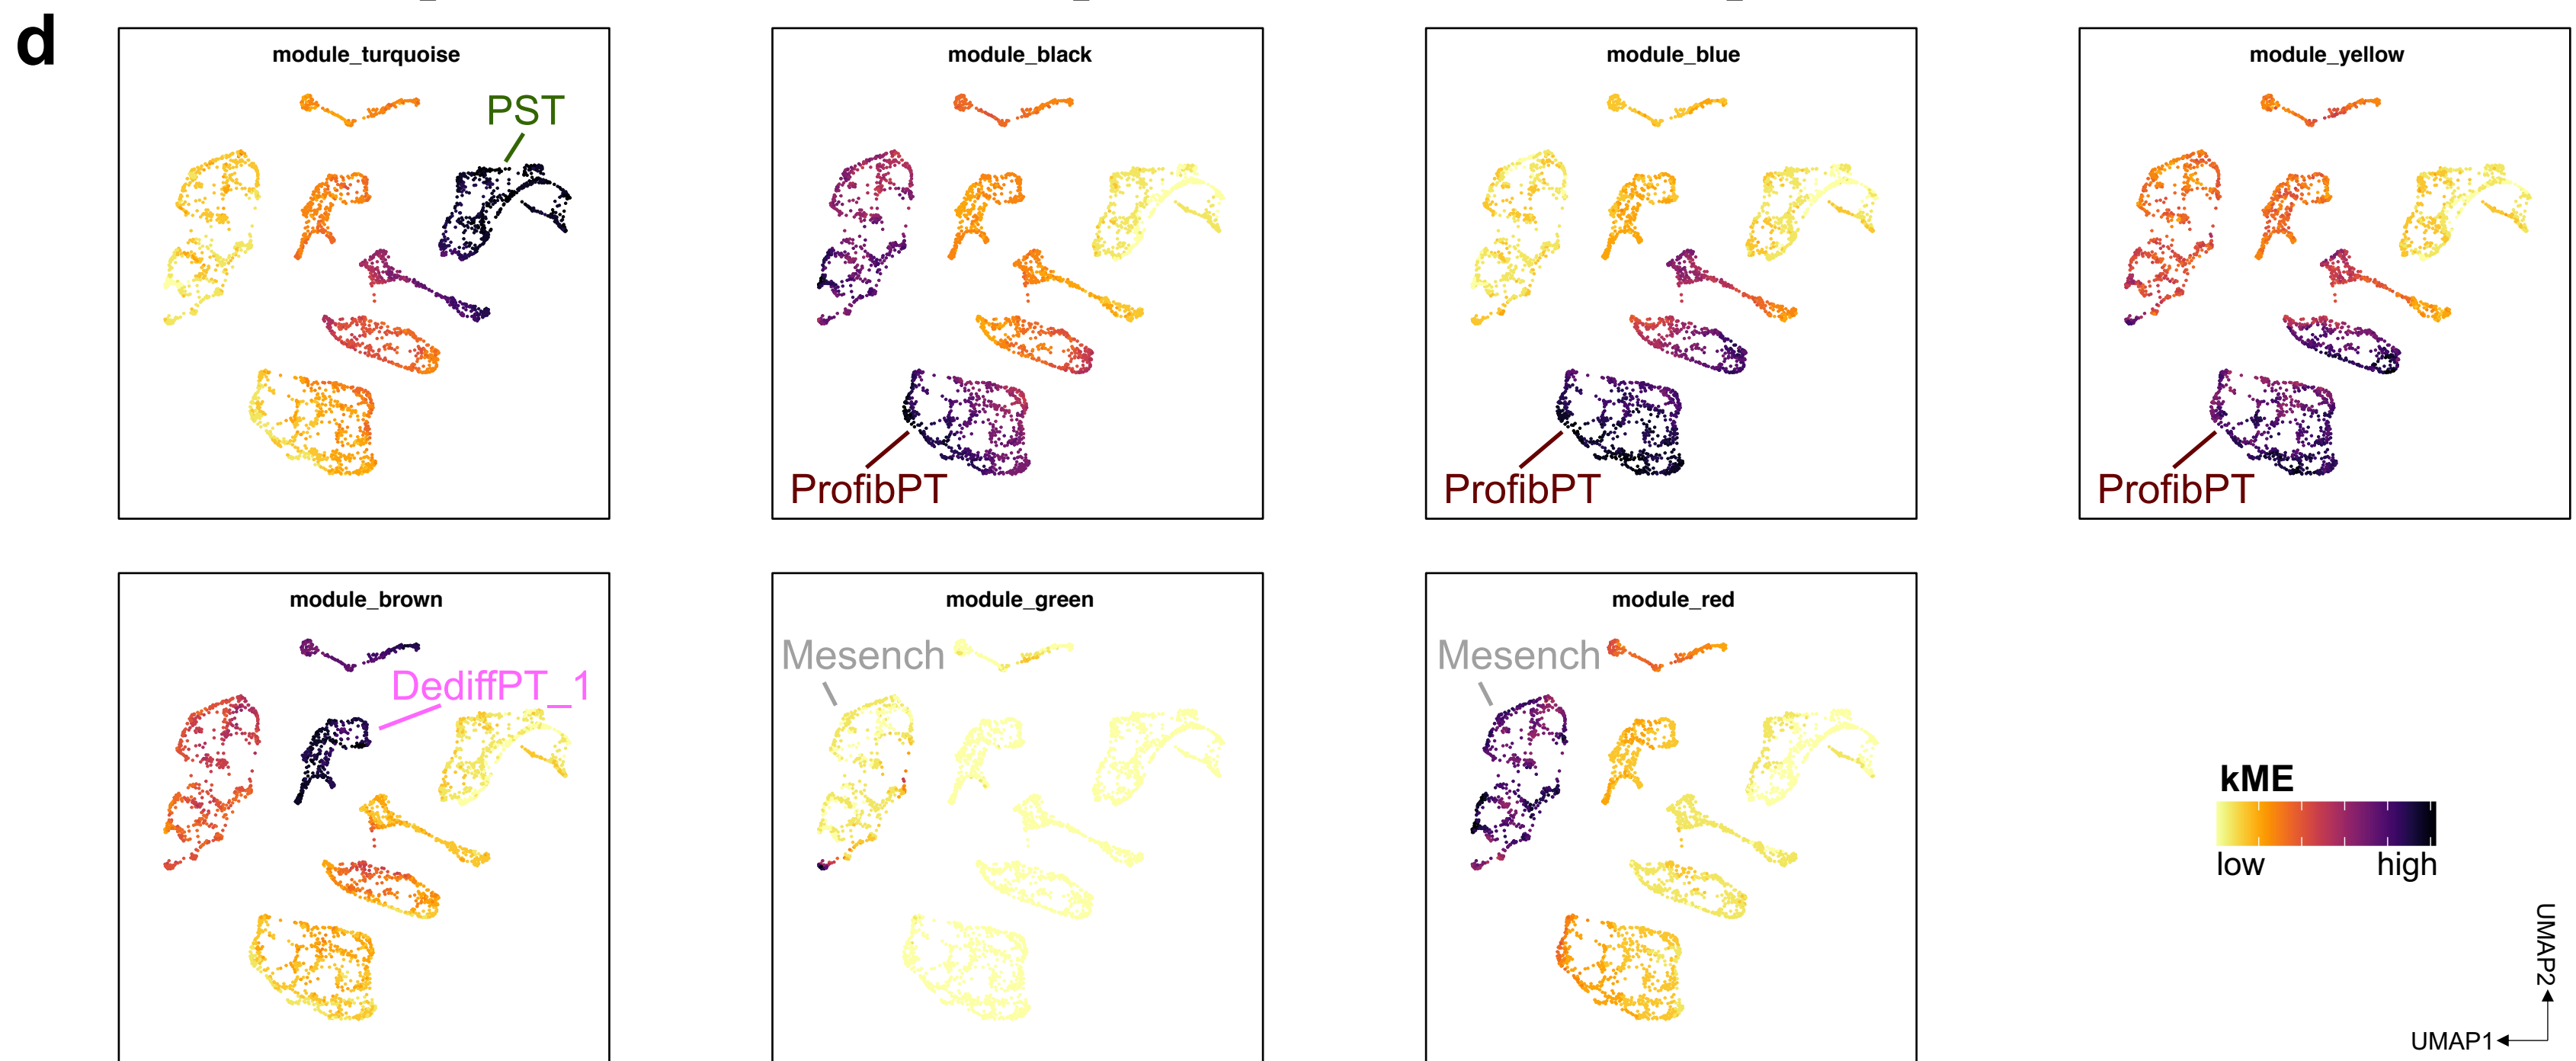

**Figure S13. WGCNA analysis in PT-Mesench trajectory metanuclei. Related to Figure 7.**

- (a) Bar graph depicting the number of genes in WGCNA-derived modules.
- (b) Intramodular connectivity (kME) values of *Gucy1a2*, *Gucy1b1*, and *Gucy1b2*.
- (c) Module eigengene (ME) scores of WGCNA modules displayed as Tukey box plots (outliers denoted as dots outside box plot whiskers) by cell clusters along the PT-Mesench trajectory (n=3,120 metanuclei). PST, proximal straight tubule; PTinj, injured PT; ProfibPT, profibrotic PT; DediffPT, dedifferentiated PT; Int, interstitial cell; Mesench, mesenchymal cell.
- (d) kME values of individual WGCNA modules visualized in UMAP space.

**a**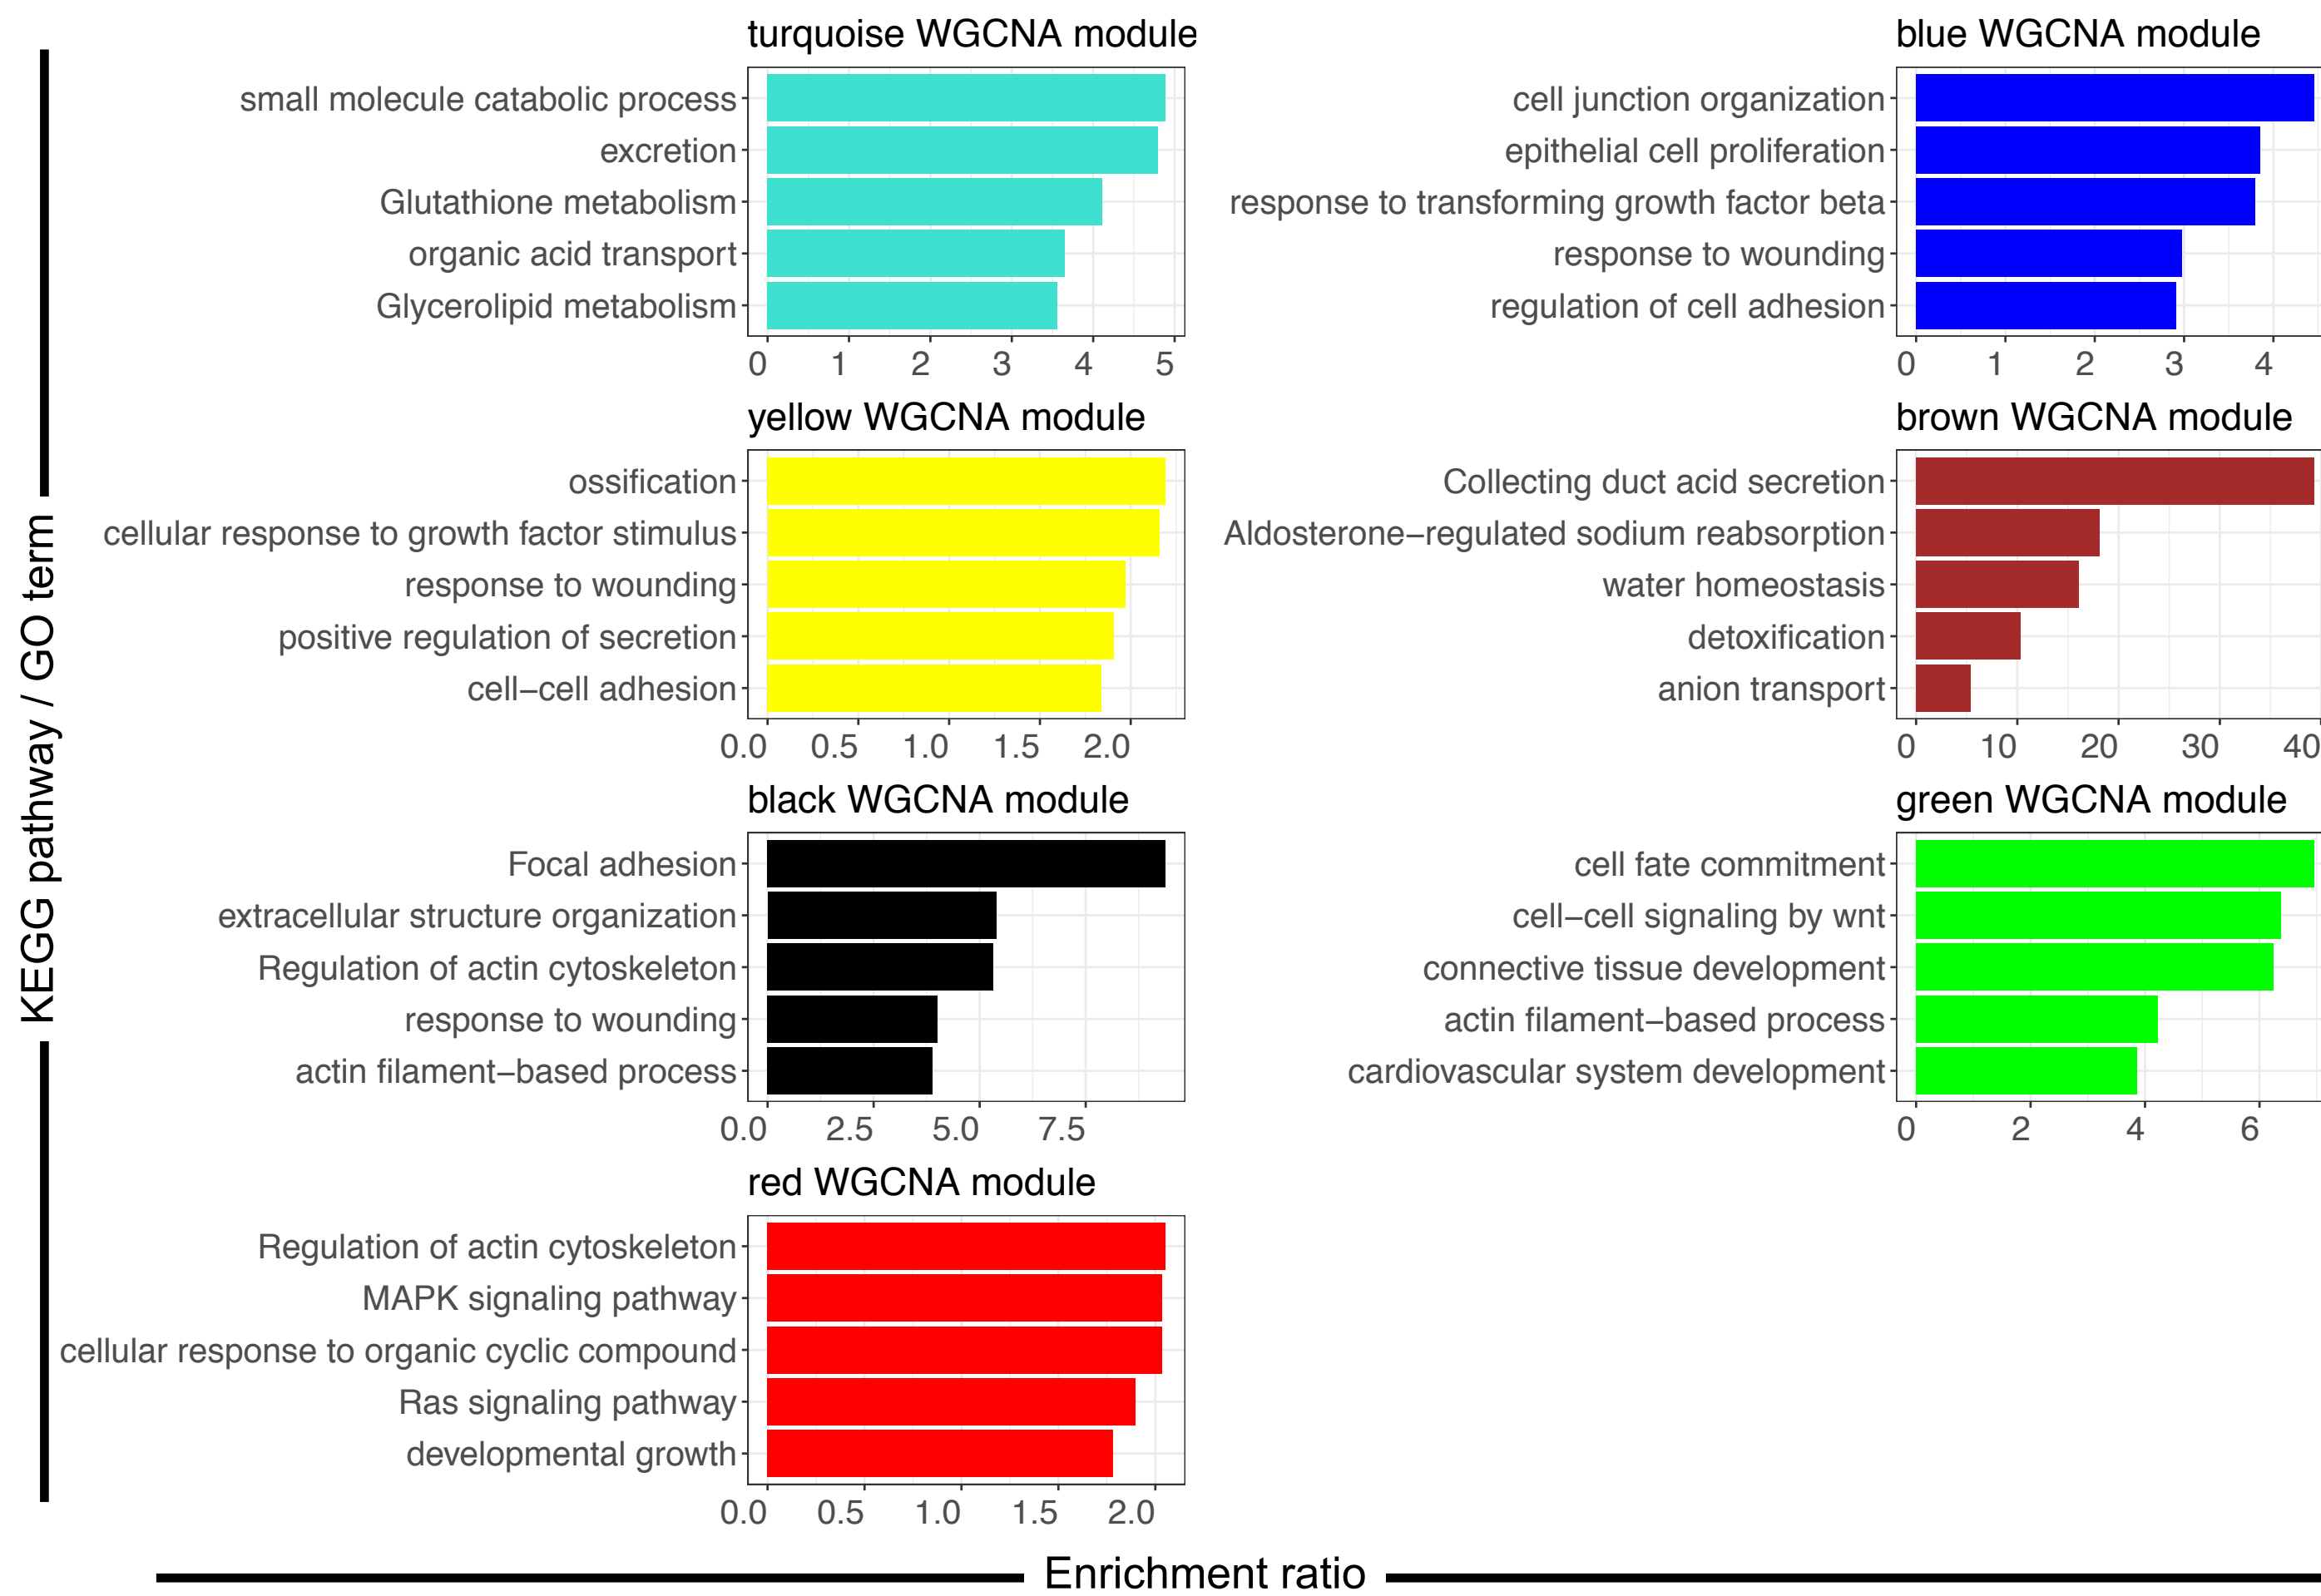**b**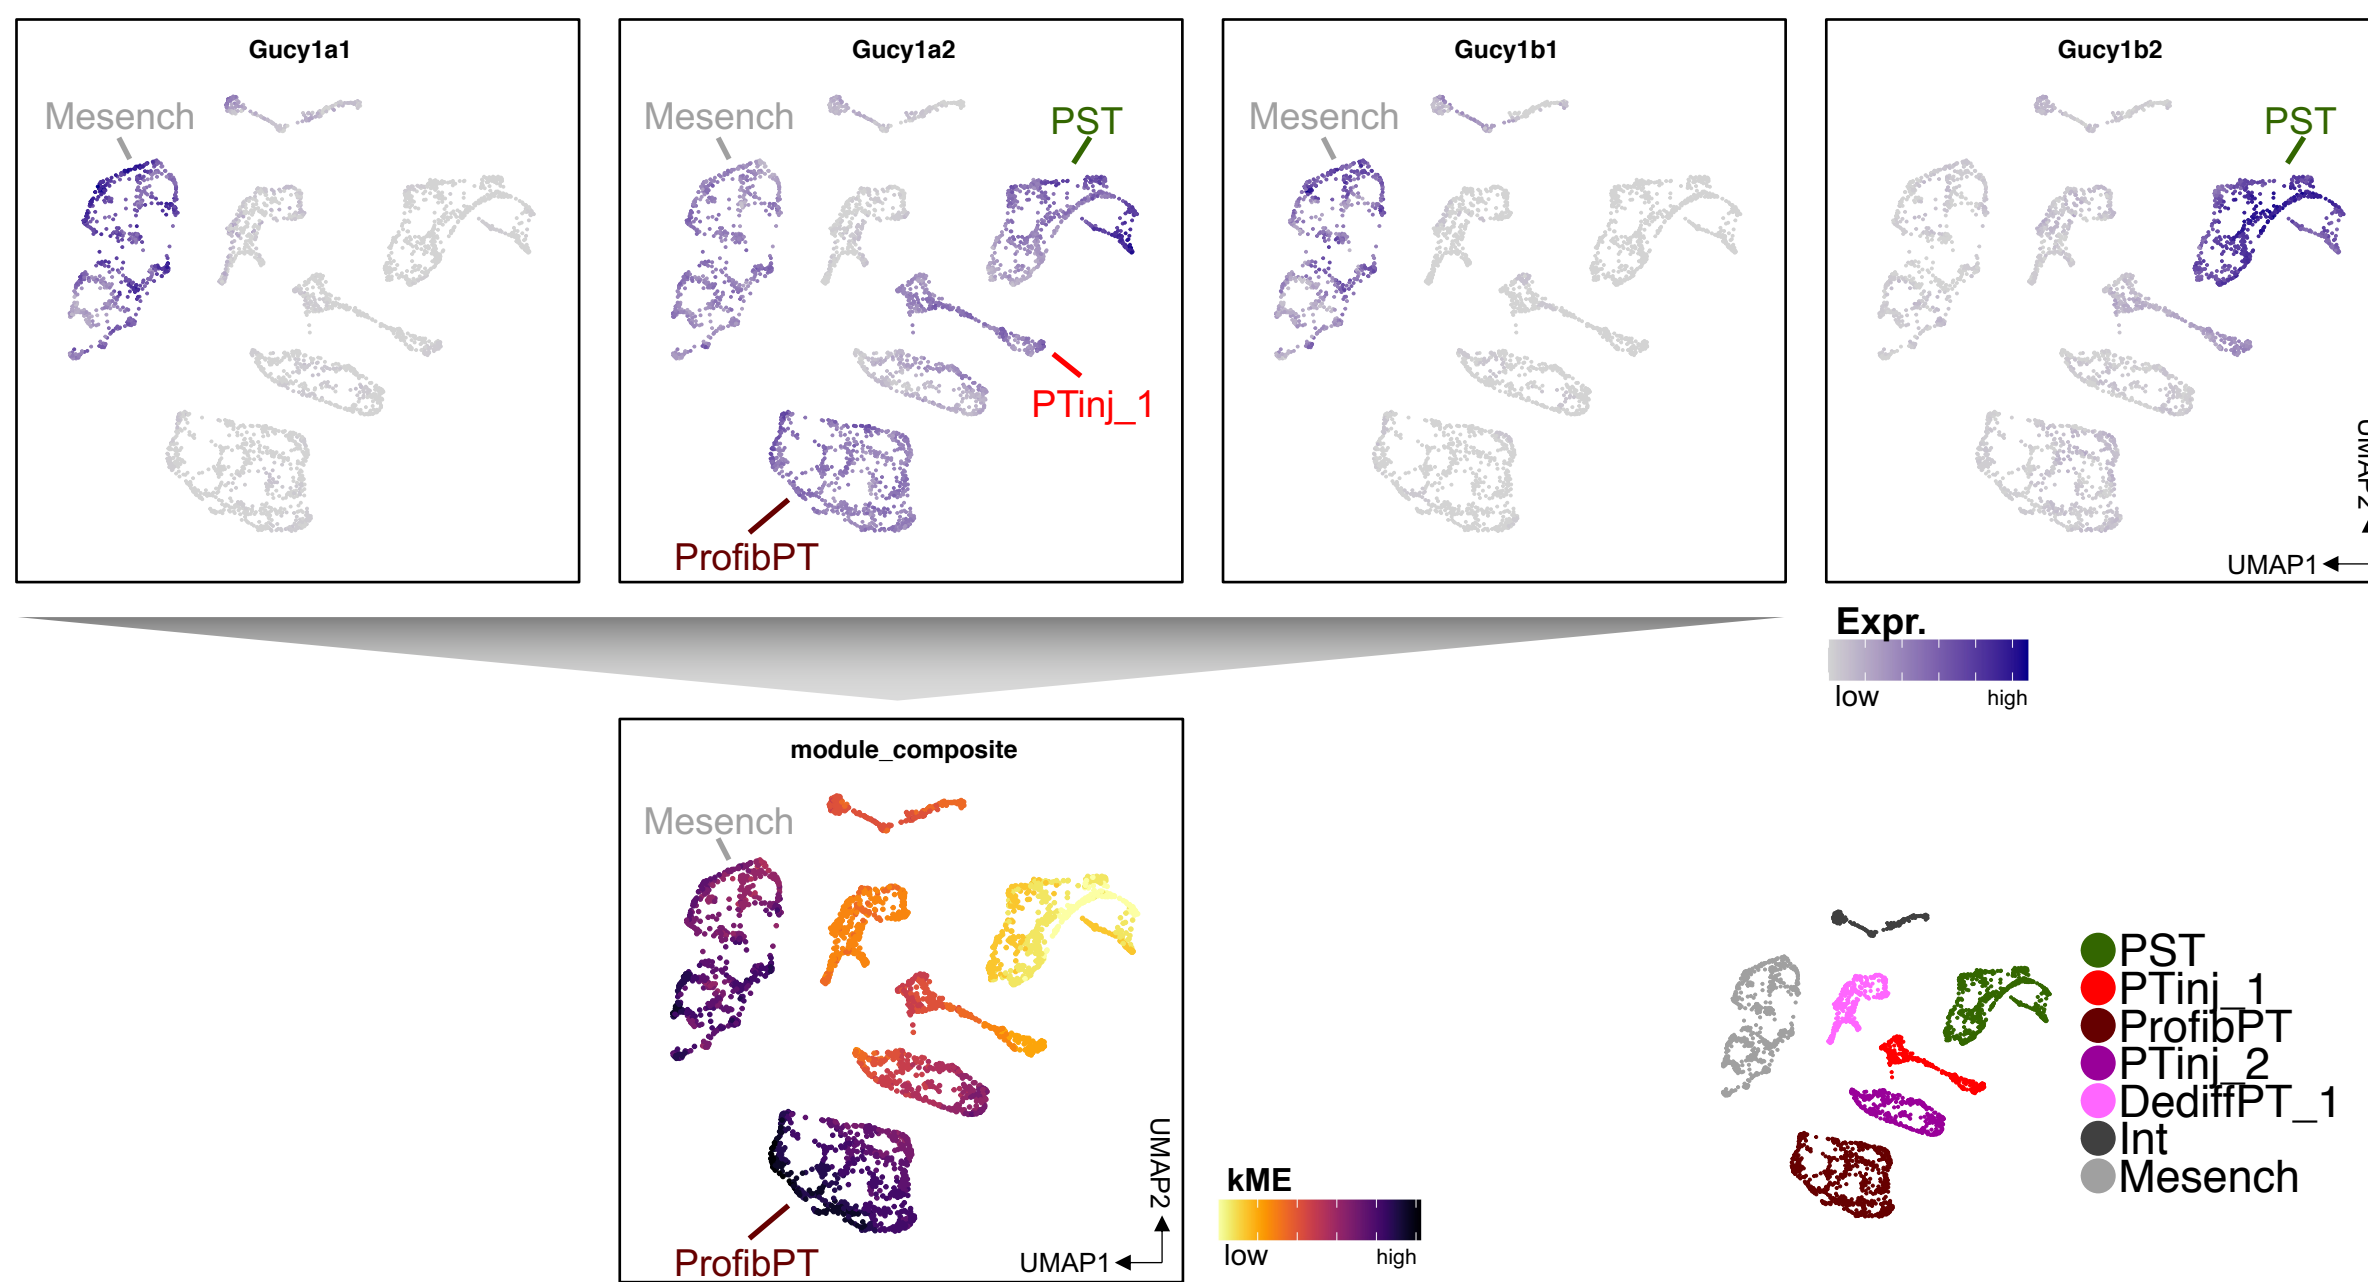**c**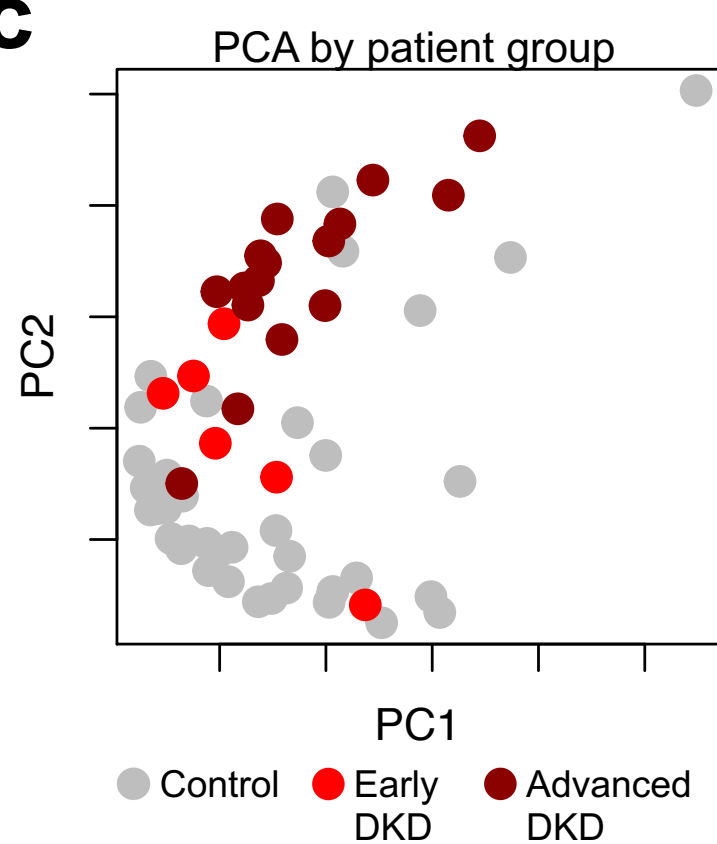**d**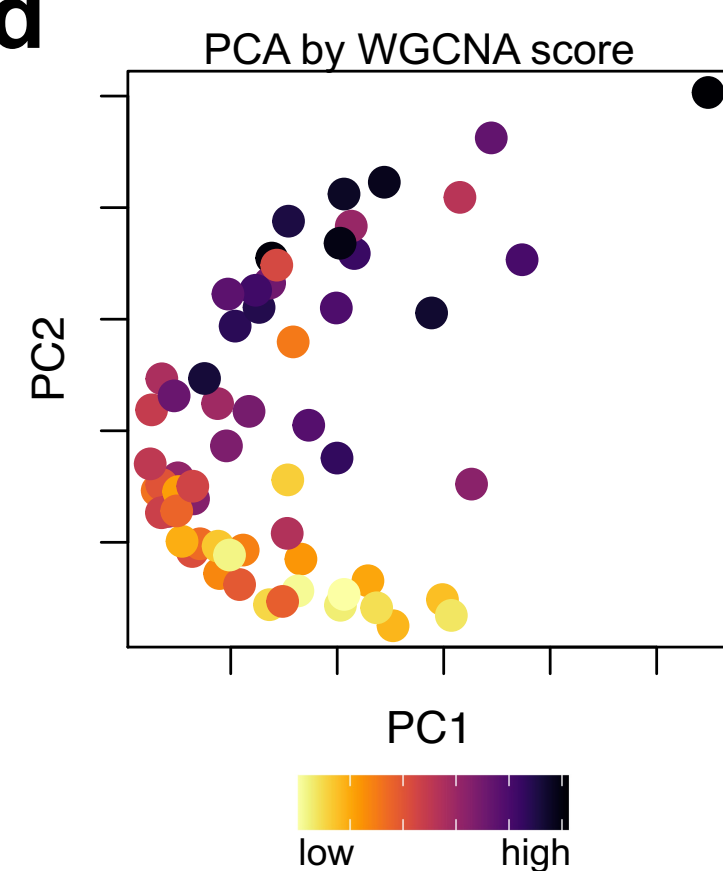**e**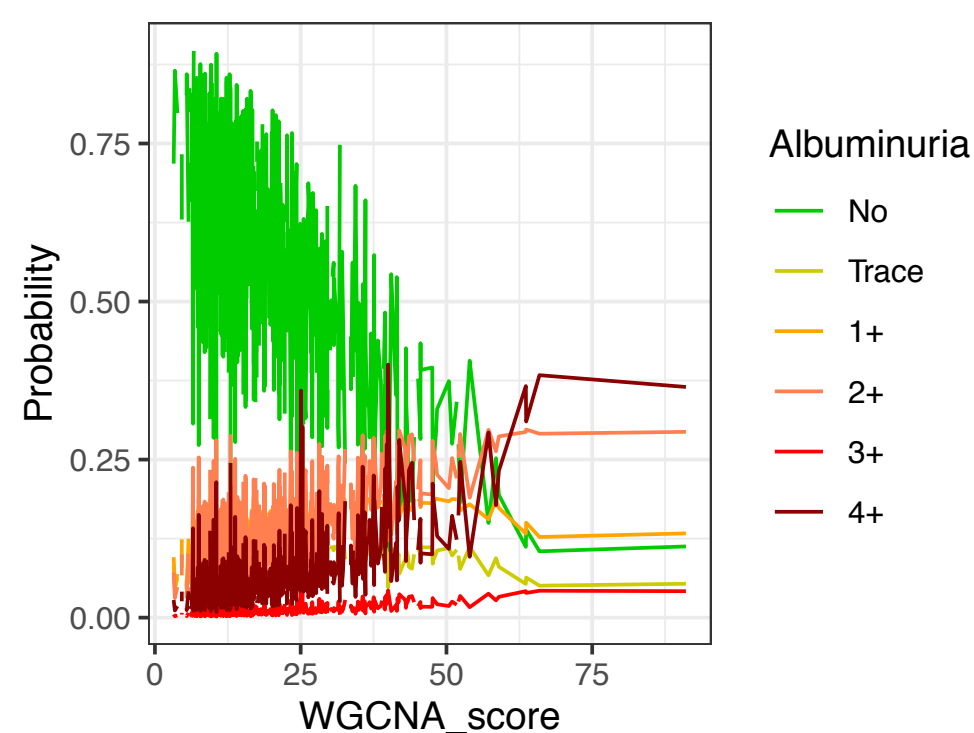**f**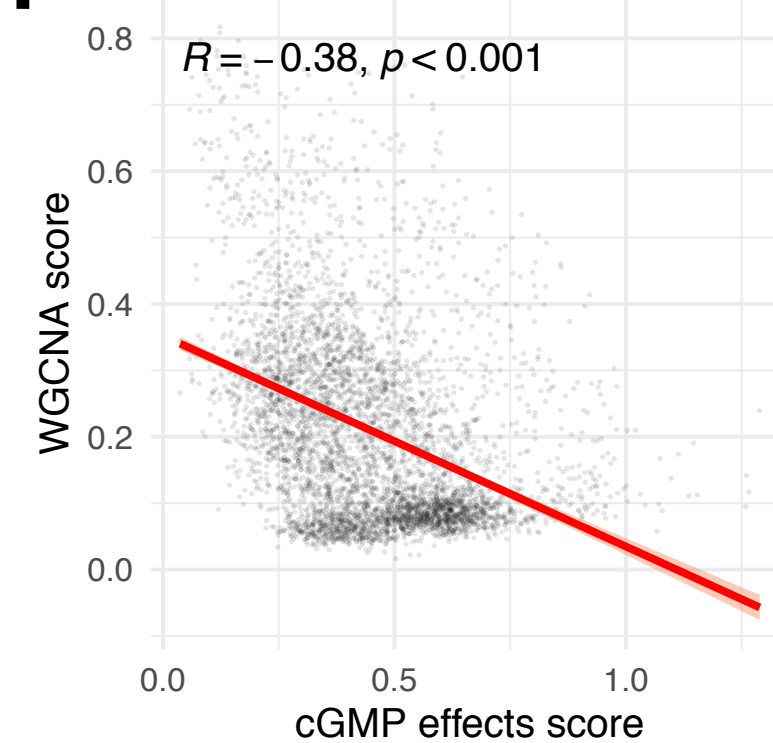

**Figure S14. WGCNA-derived sGC co-expression modules correlate with human DKD outcome variables.**

**Related to Figure 7.**

- (a) Enrichment ratios of top enriched KEGG pathway and GO terms, derived by overrepresentation analysis of WGCNA module genes. The graph is split into subpanels by WGCNA module.
- (b) Expression of sGC genes (*Gucy1a1*, *Gucy1a2*, *Gucy1b1*, *Gucy1b2*) (top) and kME values of composite WGCNA score (bottom) visualized in UMAP space. Insert (bottom right) indicates cell types along the PT-Mesench trajectory. PST, proximal straight tubule; PTinj, injured PT; ProfibPT, profibrotic PT; DediffPT, dedifferentiated PT; Int, interstitial cell; Mesench, mesenchymal cell.
- (c-d) Principal component analysis (PCA) plots stratifying microdissected kidney tubule RNA-seq samples from human individuals with and without DKD by disease severity (c) and by WGCNA score (d).
- (e) Ordinal logistic regression showed that as WGCNA score increased, probability of human subjects to have any form of albuminuria increased and probability to be normoalbuminuric decreased.
- (f) Scatterplot for correlation of WGCNA score (y axis) and REACTOME “cGMP effects” score (x axis); p value is given for linear regression, error bands represent 95% confidence interval.
